# Supplementary material for: Regioselective synthesis of indenones via nickel-catalyzed Larock annulations
Source: Royal Society of Chemistry journal article supplement (doi:10.1039/d1qo00487e), 2021-01-01

Electronic Supplementary Material (ESI) for Organic Chemistry Frontiers.  
This journal is © the Partner Organisations 2021

*Supporting information*

**Regioselective Synthesis of Indenones via Nickel-Catalyzed Larock Annulations**

Feipeng Liu,<sup>‡a</sup> Yongjie Li,<sup>‡a,b</sup> Xuchao Wang,<sup>a</sup> Qing Qiang,<sup>a</sup> Zijuan Yan,<sup>a</sup> Yao Zhang,<sup>b</sup> and Zi-Qiang Rong<sup>\*a,c</sup>

<sup>a</sup>Frontiers Science Center for Flexible Electronics (FSCFE), Shaanxi Institute of Flexible Electronics (SIFE) & Shaanxi Institute of Biomedical Materials and Engineering (SIBME), Northwestern Polytechnical University (NPU), 127 West Youyi Road, Xi'an 710072, P. R. China

<sup>b</sup>College of Chemistry, Liaoning University, Shenyang, 110036, P. R. China

<sup>c</sup>Chongqing Key Laboratory of Natural Product Synthesis and Drug Research, Chongqing 401331, P. R. China

**Table of Content**

|                                                                |    |
|----------------------------------------------------------------|----|
| 1. General Information.....                                    | 2  |
| 2. Optimization of Ni-catalyzed Indenone synthesis.....        | 3  |
| 3. Experimental Procedures and Characterization Data .....     | 4  |
| 3.1. Preparation of aryl triflates (1): .....                  | 4  |
| 3.2. Preparation of alkyne (2):.....                           | 4  |
| 3.3 General Procedure of Ni-Catalyzed Annulation Reaction..... | 4  |
| 4. References .....                                            | 18 |
| 5. NMR Spectra .....                                           | 19 |

## 1. General Information

Unless noted otherwise, all solvents were dried by filtration through a Pure-Solv MD-5 Solvent Purification System (Innovative Technology). Fluorobenzene(Ph-F) was carefully freeze-pump-thawed and dried by 4A molecular sieves(activated at 350 °C for 8h). Reaction temperatures were reported as the temperatures of the bath surrounding vial. Sensitive reagents and solvents were transferred under nitrogen into a nitrogen-filled glovebox with standard techniques. Analytical thin-layer chromatography (TLC) was carried out using 0.2 mm commercial silica gel plates (silica gel 60, F254, Leyan chemical). Vial (26 x 109 mm (15 mL) with PTFE lined cap attached) were purchased from Synthware. High resolution mass spectra (HR-MS) were recorded on an Agilent 6530 LC Q-TOF mass spectrometer using electrospray ionization with fragmentation voltage set at 115 V and processed with an Agilent MassHunter Operating System. Nuclear magnetic resonance spectra ( $^1\text{H}$  NMR,  $^{13}\text{C}$  NMR and  $^{19}\text{F}$  NMR) were recorded with a Bruker DMX 400 (400 MHz,  $^1\text{H}$  at 400 MHz,  $^{13}\text{C}$  at 101 MHz) or Bruker Model DMX 500 (500 MHz,  $^1\text{H}$  at 500 MHz,  $^{13}\text{C}$  at 126 MHz,). Chemical shifts were reported in parts per million (ppm,  $\delta$ ), downfield from tetramethylsilane (TMS,  $\delta=0.00\text{ppm}$ ) and were referenced to residual solvent ( $\text{CDCl}_3$ ,  $\delta=7.26$  ppm ( $^1\text{H}$ ) and 77.00 ppm ( $^{13}\text{C}$ )). All the  $^{19}\text{F}$  chemical shifts were not referenced. Coupling constants were reported in Hertz (Hz). Data for  $^1\text{H}$  NMR spectra were reported as follows: chemical shift (ppm, referenced to protium, s = singlet, d = doublet, t = triplet, q = quartet, quin = quintet, dd = doublet of doublets, td = triplet of doublets, ddd = doublet of doublet of doublets, m = multiplet, coupling constant (Hz), and integration). All other materials were obtained from Rhawn Corporation, Aladdin Bio-Chem Technology or Energy chemical and were used as received.

## 2. Optimization of Ni-catalyzed Indenone synthesis

Table S1 Optimization of Ni-catalyzed annulation reaction between **1a** and **2a**<sup>a</sup>

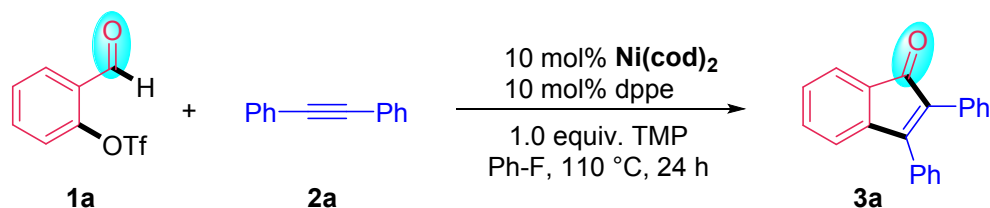

| entry    | Variation from standard conditions                        | yield (%) <sup>b</sup> |
|----------|-----------------------------------------------------------|------------------------|
| <b>1</b> | <b>None</b>                                               | <b>89</b>              |
| 2        | w/o [Ni]                                                  | < 5%                   |
| 3        | w/o ligand                                                | < 5%                   |
| 4        | w/o TMP                                                   | 10                     |
| 5        | 5 mol% Ni(cod) <sub>2</sub>                               | 79%                    |
| 6        | NiBr <sub>2</sub> instead of Ni(cod) <sub>2</sub>         | < 5%                   |
| 7        | Ni(OTf) <sub>2</sub> instead of Ni(cod) <sub>2</sub>      | 6                      |
| 8        | Ni(acac) <sub>2</sub> instead of Ni(cod) <sub>2</sub>     | < 5%                   |
| 9        | NiCl <sub>2</sub> . glyme instead of Ni(cod) <sub>2</sub> | 11                     |
| 10       | IPr instead of dppe                                       | < 5%                   |
| 11       | IMes instead of dppe                                      | < 5%                   |
| 12       | 2,2'-bipyridine instead of dppe                           | < 5%                   |
| 13       | PCy <sub>3</sub> instead of dppe                          | < 5%                   |
| 14       | dppp instead of dppe                                      | 64                     |
| 15       | dppb instead of dppe                                      | 75                     |
| 16       | dcype instead of dppe                                     | 49                     |
| 17       | Xantphos instead of dppe                                  | 8                      |
| 18       | 1,2,2,6,6-pentamethylpiperidine instead of TMP            | 86                     |
| 19       | 1-methylpiperidine instead of TMP                         | 18                     |
| 20       | K <sub>2</sub> CO <sub>3</sub> instead of TMP             | 32                     |
| 21       | toluene instead of Ph-F                                   | 61                     |
| 22       | chlorobenzene instead Ph-F                                | 57                     |
| 23       | THF instead of Ph-F                                       | 5                      |
| 24       | 2-Bromobenzaldehyde instead of <b>1a</b>                  | 29 <sup>c</sup>        |
| 25       | 2-Iodo benzaldehyde instead of <b>1a</b>                  | 54 <sup>c</sup>        |
| 26       | 1,4-dioxane instead of Ph-F                               | 6                      |
| 27       | 0.05 M instead of 0.1 M                                   | 80%                    |
| 28       | 0.2 M instead of 0.1 M                                    | 86%                    |

<sup>a</sup>Reaction condition: **1a**(0.2mmol), **2a** (0.4 mmol), TMP (1.0 equiv.), Ni(cod)<sub>2</sub> catalyst (10 mol%), in Ph-F (2.0 mL) at 110 °C under N<sub>2</sub> for 24 h. <sup>b</sup>Yields was isolated. <sup>c</sup>2-(1,2-diphenylvinyl)benzaldehyde byproduct was founded.

### 3. Experimental Procedures and Characterization Data

#### 3.1. Preparation of aryl triflates (1):

Aryl triflates **1a-1k** and **4** were known compounds and were synthesized according to the reported procedures.<sup>1</sup>

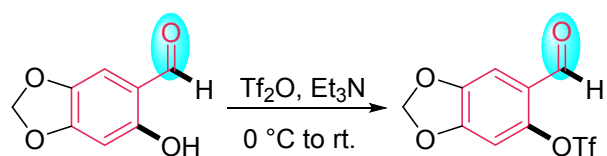

To a solution of salicylaldehyde (830.7 mg, 5.0 mmol) in  $\text{CH}_2\text{Cl}_2$  (15 mL),  $\text{Et}_3\text{N}$  (2.0 mL, 15 mmol) and  $\text{Tf}_2\text{O}$  (1.4 mL, 7.5 mmol) were successively added at  $0\text{ }^\circ\text{C}$ . After being stirred for 3 h at room temperature, the reaction was stopped by adding saturated aqueous  $\text{NaHCO}_3$  at  $0\text{ }^\circ\text{C}$ . The crude product was extracted with  $\text{CH}_2\text{Cl}_2$  and the combined organic extracts were washed with 1 M aqueous HCl, brine, dried over  $\text{Na}_2\text{SO}_4$ , and concentrated in vacuo. The residue was purified by column chromatography (silica gel, PE/EtOAc = 10/1) to give **11** (1.4 g, 91%) as a colorless oil.

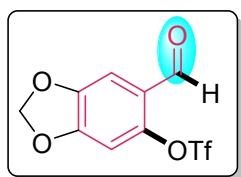

**11**:  $^1\text{H NMR}$  (500 MHz,  $\text{CDCl}_3$ )  $\delta$  10.11 (s, 1H), 7.36 (s, 1H), 6.85 (s, 1H), 6.17 (s, 2H).  $^{13}\text{C NMR}$  (126 MHz,  $\text{CDCl}_3$ )  $\delta$  184.8, 153.5, 148.1, 146.6, 123.4, 118.6 (q,  $J = 320.8$  Hz), 106.9, 103.6, 103.4.  $^{19}\text{F NMR}$  (471 MHz,  $\text{CDCl}_3$ )  $\delta$  -72.7. **HRMS** (ESI): Calculated for  $\text{C}_9\text{H}_6\text{F}_3\text{O}_6\text{S}$  ( $\text{M}+\text{H}^+$ ): 298.9832, found: 298.9825.

#### 3.2. Preparation of alkyne (2):

Alkenes **2** are commercially available from Rhawn Corporation, Aladdin Bio-Chem Technology and Energy chemical, or synthesized according to the reported procedures.<sup>2</sup>

#### 3.3 General Procedure of Ni-Catalyzed Annulation Reaction

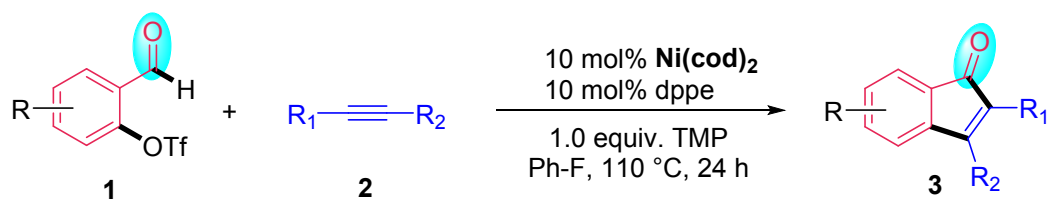

A flame-dried 15.0 mL vial were charged with 2-formylphenyl trifluoromethanesulfonate **1** (0.3 mmol, 1.0 equiv.) and substituted alkyne **2** (0.6 mmol, 2.0 equiv.). The vial was directly transferred into a nitrogen-filled glovebox without caps. Then,  $\text{Ni}(\text{cod})_2$  (8.3 mg, 0.03 mmol, 10 mol%), dppe (12.0 mg, 0.03 mmol, 10 mol%), TMP (42.4 mg, 0.3 mmol, 1.0 equiv.) and 3.0 mL dry Ph-F were added. The vial was tightly sealed, transferred out of glovebox and stirred at 100 °C for 24 hours. After completion of the reaction, the mixture was filtered through a thin pad of silica gel and washed with EtOAc. The solvent was removed *in vacuo* and the residue was purified by flash column chromatography on silica gel to give the desired indenone product.

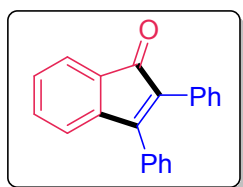

CAS: 1801-42-9

**3a**: Red solid (0.3 mmol scale, 75.3 mg, 89%).  $R_f = 0.35$  (hexane/ethyl acetate = 10:1).  $^1\text{H NMR}$  (400 MHz,  $\text{CDCl}_3$ )  $\delta$  7.59 (d,  $J = 6.8$  Hz, 1H), 7.45 – 7.34 (m, 6H), 7.31 – 7.23 (m, 6H), 7.15 (d,  $J = 7.3$  Hz, 1H).  $^{13}\text{C NMR}$  (101 MHz,  $\text{CDCl}_3$ )  $\delta$  196.5, 155.3, 145.2, 133.4, 132.7, 132.4, 130.7, 130.7, 130.0, 129.3, 128.9, 128.8, 128.5, 128.1, 127.7, 123.0, 121.2. Both the  $^1\text{H NMR}$  and  $^{13}\text{C NMR}$  match the literature reported data.<sup>3</sup>

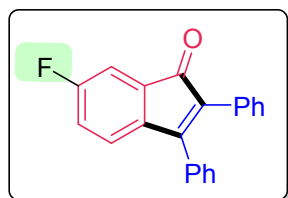

CAS: 1632479-36-7

**3b**: Orange solid (0.3 mmol scale, 87.4 mg, 97%).  $R_f = 0.35$  (hexane/ethyl acetate = 10:1).  $^1\text{H NMR}$  (500 MHz,  $\text{CDCl}_3$ ) 7.40 (m, 3H), 7.36 (m, 2H), 7.28 (dd,  $J = 7.0, 2.4$  Hz, 1H), 7.24 (m, 4H), 7.09 (dd,  $J = 8.0, 4.5$  Hz, 1H), 7.01 (td,  $J = 8.5, 2.4$  Hz, 1H).  $^{13}\text{C NMR}$  (126 MHz,  $\text{CDCl}_3$ )  $\delta$  194.9, 163.7(d,  $J = 250.4$  Hz), 155.4, 140.6(d,  $J = 3.4$  Hz), 133.2(d,  $J = 7.3$  Hz), 132.7(d,  $J = 5.4$  Hz), 132.5, 130.5, 129.9, 129.6, 128.9, 128.4, 128.2, 127.9, 122.4(d,  $J = 8.0$

Hz), 118.6 (d,  $J = 23.0$  Hz), 111.6(d,  $J = 24.8$  Hz). Both the  $^1\text{H}$  NMR and  $^{13}\text{C}$  NMR match the literature reported data.<sup>3</sup>

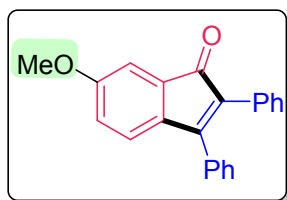

CAS: 70603-19-9

**3c:** Red solid (0.3 mmol scale, 66.5 mg, 71%).  $R_f = 0.30$  (hexane/ethyl acetate = 5:1).  $^1\text{H}$  NMR (500 MHz,  $\text{CDCl}_3$ )  $\delta$  7.38 (m, 6H), 7.26 – 7.18 (m, 5H), 7.02 (d,  $J = 8.0$  Hz, 1H), 6.78 (dd,  $J = 8.0, 2.5$  Hz, 1H), 3.83 (s, 3H).  $^{13}\text{C}$  NMR (126 MHz,  $\text{CDCl}_3$ )  $\delta$  196.2, 161.1, 156.4, 137.0, 133.0, 132.9, 131.4, 131.0, 129.9, 129.4, 128.8, 128.5, 128.1, 127.5, 122.3, 116.3, 110.7, 55.8. Both the  $^1\text{H}$  NMR and  $^{13}\text{C}$  NMR match the literature reported data.<sup>4</sup>

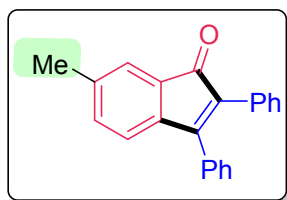

CAS: 34665-58-2

**3d:** Orange solid (0.3 mmol scale, 53.8 mg, 77.3%).  $R_f = 0.40$  (hexane/ethyl acetate = 10:1).  $^1\text{H}$  NMR (500 MHz,  $\text{CDCl}_3$ )  $\delta$  7.56 – 7.32 (m, 6H), 7.28 (d,  $J = 3.9$  Hz, 5H), 7.18 (d,  $J = 7.4$  Hz, 1H), 7.05 (d,  $J = 7.4$  Hz, 1H), 2.41 (s, 3H).  $^{13}\text{C}$  NMR (126 MHz,  $\text{CDCl}_3$ )  $\delta$  196.8, 155.6, 142.4, 139.3, 133.3, 132.9, 131.8, 131.1, 130.9, 129.9, 129.2, 128.7, 128.5, 128.0, 127.6, 124.1, 121.1, 21.4. Both the  $^1\text{H}$  NMR and  $^{13}\text{C}$  NMR match the literature reported data.<sup>3</sup>

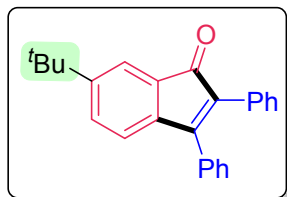

**3e:** Orange solid (0.3 mmol scale, 88.4 mg, 87%). Melting point: 141-143 °C.  $R_f = 0.40$  (hexane/ethyl acetate = 10:1).  $^1\text{H}$  NMR (500 MHz,  $\text{CDCl}_3$ )  $\delta$  7.70 (s, 1H), 7.42 (m, 6H), 7.29 (m, 5H), 7.10 (d,  $J = 7.7$  Hz, 1H), 1.37 (s, 9H).  $^{13}\text{C}$  NMR (126 MHz,  $\text{CDCl}_3$ )  $\delta$  196.9, 155.4, 152.9, 142.4, 132.9, 132.3, 131.0, 130.9, 129.9, 129.5, 129.2, 128.7, 128.5, 128.1, 127.6, 121.0, 120.8, 35.1, 31.1. **HRMS** (ESI): Calculated for  $\text{C}_{25}\text{H}_{23}\text{O}$  ( $\text{M}+\text{H}^+$ ): 339.1743, found: 339.1740.

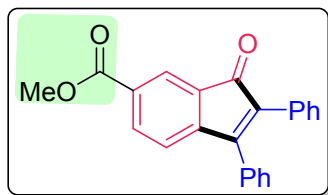

CAS: 2324882-81-5

**3f:** Orange solid (0.3 mmol scale, 67.3 mg, 66%).  $R_f = 0.35$  (hexane/ethyl acetate = 10:1).  $^1\text{H NMR}$  (500 MHz,  $\text{CDCl}_3$ )  $\delta$  8.21 (s, 1H), 8.12 (d,  $J = 7.7$  Hz, 1H), 7.50 – 7.35 (m, 6H), 7.28 (s, 4H), 7.23 (d,  $J = 7.6$  Hz, 1H), 3.94 (s, 3H).  $^{13}\text{C NMR}$  (126 MHz,  $\text{CDCl}_3$ )  $\delta$  195.1, 166.1, 154.4, 149.6, 135.6, 134.6, 132.2, 130.9, 130.8, 130.2, 130.0, 129.6, 128.9, 128.5, 128.2, 128.2, 123.6, 121.0, 52.3. Both the  $^1\text{H NMR}$  and  $^{13}\text{C NMR}$  match the literature reported data.<sup>3</sup>

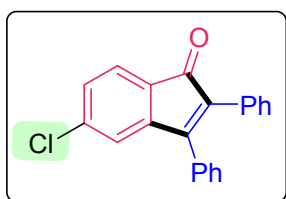

CAS: 855612-26-9

**3g:** Orange solid (0.3 mmol scale, 91.1 mg, 96%).  $R_f = 0.35$  (hexane/ethyl acetate = 10:1).  $^1\text{H NMR}$  (500 MHz,  $\text{CDCl}_3$ )  $\delta$  7.51 (d,  $J = 7.6$  Hz, 1H), 7.46 – 7.41 (m, 3H), 7.36 (dd,  $J = 6.7, 3.0$  Hz, 2H), 7.26 (s, 6H), 7.11 (d,  $J = 1.6$  Hz, 1H).  $^{13}\text{C NMR}$  (101 MHz,  $\text{CDCl}_3$ )  $\delta$  195.0, 154.0, 147.2, 139.7, 133.5, 132.2, 130.3, 130.0, 129.6, 129.0, 128.9, 128.5, 128.4, 128.13, 128.06, 123.9, 122.0. Both the  $^1\text{H NMR}$  and  $^{13}\text{C NMR}$  match the literature reported data.<sup>3</sup>

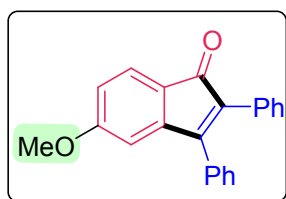

CAS: 65908-33-0

**3h:** Orange solid (0.3 mmol scale, 62.9 mg, 67%).  $R_f = 0.30$  (hexane/ethyl acetate = 5:1).  $^1\text{H NMR}$  (500 MHz,  $\text{CDCl}_3$ )  $\delta$  7.58 (d,  $J = 7.8$  Hz, 1H), 7.43 (dt,  $J = 6.0, 2.6$  Hz, 3H), 7.39 (dd,  $J = 6.8, 3.0$  Hz, 2H), 7.28 (mz, 5H), 6.73 (d,  $J = 2.1$  Hz, 1H), 6.70 (dd,  $J = 7.9, 2.2$  Hz, 1H), 3.86 (s, 3H).  $^{13}\text{C NMR}$  (126 MHz,  $\text{CDCl}_3$ )  $\delta$  195.0, 164.4, 153.1, 147.9, 133.8, 132.7, 130.8, 130.0, 129.1, 128.8, 128.5, 128.0, 127.7, 124.9, 123.4, 110.4, 110.3, 55.7. Both the  $^1\text{H NMR}$  and  $^{13}\text{C NMR}$  match the literature reported data.<sup>5</sup>

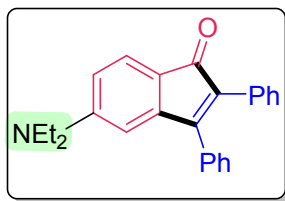

CAS: 1924649-77-3

**3i:** Red solid (0.3 mmol scale, 76.3 mg, 72%).  $R_f = 0.25$  (hexane/ethyl acetate = 3:1).  $^1\text{H NMR}$  (500 MHz,  $\text{CDCl}_3$ )  $\delta$  7.51 (d,  $J = 8.3$  Hz, 1H), 7.47 – 7.34 (m, 5H), 7.34 – 7.21 (m, 5H), 6.47 (d,  $J = 2.3$  Hz, 1H), 6.38 (dd,  $J = 8.3, 2.3$  Hz, 1H), 3.42 (q,  $J = 7.1$  Hz, 4H), 1.21 (t,  $J = 7.1$  Hz, 6H).  $^{13}\text{C NMR}$  (126 MHz,  $\text{CDCl}_3$ )  $\delta$  194.4, 152.0, 151.7, 148.5, 134.3, 133.2, 131.5, 130.0, 128.6, 128.6, 127.8, 127.3, 125.6, 117.1, 107.5, 106.2, 44.9, 12.6. Both the  $^1\text{H NMR}$  and  $^{13}\text{C NMR}$  match the literature reported data.<sup>5</sup>

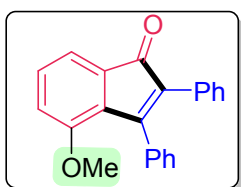

CAS: 70603-18-8

**3j:** Orange solid (0.3 mmol scale, 74.0 mg, 79%).  $R_f = 0.35$  (hexane/ethyl acetate = 5:1).  $^1\text{H NMR}$  (500 MHz,  $\text{CDCl}_3$ )  $\delta$  7.36 (m, 5H), 7.32 – 7.27 (m, 2H), 7.22 (m, 3H), 7.18 (m, 2H), 7.01 (dd,  $J = 7.0, 2.3$  Hz, 1H), 3.61 (s, 3H).  $^{13}\text{C NMR}$  (126 MHz,  $\text{CDCl}_3$ )  $\delta$  196.5, 157.0, 154.0, 134.9, 132.6, 132.2, 131.0, 130.9, 130.1, 128.6, 128.3, 127.8, 127.5, 127.3, 119.6, 116.0, 55.7. Both the  $^1\text{H NMR}$  and  $^{13}\text{C NMR}$  match the literature reported data.<sup>6</sup>

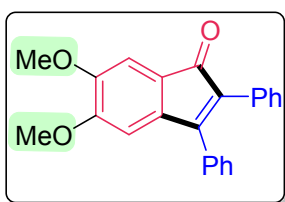

CAS: 1629016-39-2

**3k:** Red solid (0.3 mmol scale, 72.9 mg, 71%).  $R_f = 0.25$  (hexane/ethyl acetate = 3:1).  $^1\text{H NMR}$  (500 MHz,  $\text{CDCl}_3$ )  $\delta$  7.46 – 7.34 (m, 5H), 7.26 – 7.20 (m, 6H), 6.68 (s, 1H), 3.93 (s, 3H), 3.87 (s, 3H).  $^{13}\text{C NMR}$  (126 MHz,  $\text{CDCl}_3$ )  $\delta$  196.0, 154.0, 152.7, 149.1, 139.6, 132.9, 131.3, 130.9, 129.8, 129.2, 128.8, 128.3, 128.0, 127.4, 123.0, 107.6, 105.9, 56.4, 56.3. Both the  $^1\text{H NMR}$  and  $^{13}\text{C NMR}$  match the literature reported data.<sup>7</sup>



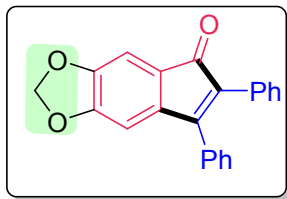

CAS: 1300636-00-3

**3l:** Red solid (0.3 mmol scale, 75.4 mg, 77%).  $R_f = 0.35$  (hexane/ethyl acetate = 3:1).  $^1\text{H NMR}$  (500 MHz,  $\text{CDCl}_3$ )  $\delta$  7.4 (m, 3H), 7.33 (m, 2H), 7.23 (m, 5H), 7.08 (s, 1H), 6.64 (s, 1H), 6.01 (s, 2H).  $^{13}\text{C NMR}$  (126 MHz,  $\text{CDCl}_3$ )  $\delta$  195.1, 153.7, 151.6, 147.7, 141.8, 132.7, 131.4, 130.8, 129.8, 129.2, 128.8, 128.4, 128.0, 127.5, 124.7, 105.2, 104.0, 102.1. Both the  $^1\text{H NMR}$  and  $^{13}\text{C NMR}$  match the literature reported data.<sup>7</sup>

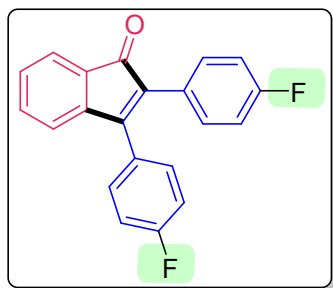

CAS: 1264166-21-3

**3m:** Orange solid (0.3 mmol scale, 83.1 mg, 87%).  $R_f = 0.30$  (hexane/ethyl acetate = 10:1).  $^1\text{H NMR}$  (500 MHz,  $\text{CDCl}_3$ )  $\delta$  7.58 (d,  $J = 7.0$  Hz, 1H), 7.42 – 7.34 (m, 3H), 7.30 (t,  $J = 7.4$  Hz, 1H), 7.12 (t,  $J = 8.8$  Hz, 3H), 7.01 – 6.93 (m, 2H).  $^{13}\text{C NMR}$  (126 MHz,  $\text{CDCl}_3$ )  $\delta$  196.2, 163.1 (d,  $J = 250.6$  Hz), 162.4 (d,  $J = 248.7$  Hz), 154.1, 144.9, 133.6, 131.7 (d,  $J = 8.2$  Hz), 131.5, 130.5 (d,  $J = 8.2$  Hz), 129.1, 128.5 (d,  $J = 3.6$  Hz), 126.5 (d,  $J = 3.6$  Hz), 123.1, 121.1, 116.2 (d,  $J = 21.6$  Hz), 115.4, 115.3 (d,  $J = 21.9$  Hz). Both the  $^1\text{H NMR}$  and  $^{13}\text{C NMR}$  match the literature reported data.<sup>4</sup>

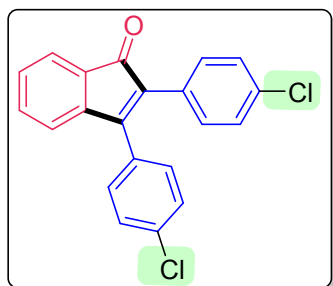

CAS: 96286-65-6

**3n:** Orange solid (0.3 mmol scale, 100.8 mg, 96%).  $R_f = 0.15$  (hexane/ethyl acetate = 3:1).  $^1\text{H NMR}$  (500 MHz,  $\text{CDCl}_3$ )  $\delta$  7.62 (d,  $J = 7.0$  Hz, 1H), 7.50 – 7.39 (m, 3H), 7.39 – 7.31 (m, 3H), 7.30 – 7.27 (m, 2H), 7.25 – 7.20 (m,

2H), 7.14 (d,  $J = 7.3$  Hz, 1H).  $^{13}\text{C NMR}$  (126 MHz,  $\text{CDCl}_3$ )  $\delta$  195.8, 154.3, 144.6, 135.5, 134.0, 133.7, 131.5, 131.2, 130.8, 130.5, 129.8, 129.3, 128.5, 123.3, 121.2. Both the  $^1\text{H NMR}$  and  $^{13}\text{C NMR}$  match the literature reported data.<sup>8</sup>

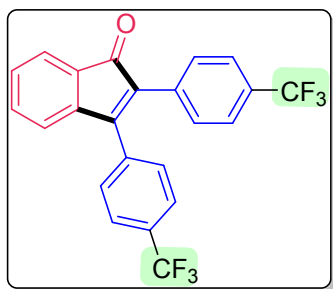

CAS: 1198576-71-4

**3o:** Yellow solid (0.3 mmol scale, 101.6 mg, 81%).  $R_f = 0.30$  (hexane/ethyl acetate = 5:1).  $^1\text{H NMR}$  (500 MHz,  $\text{CDCl}_3$ )  $\delta$  7.72 (d,  $J = 7.7$  Hz, 1H), 7.64 (d,  $J = 6.8$  Hz, 1H), 7.53 (dd,  $J = 18.5, 8.0$  Hz, 4H), 7.43 (td,  $J = 7.5, 2.4$  Hz, 1H), 7.36 (d,  $J = 7.8$  Hz, 3H), 7.12 (d,  $J = 7.1$  Hz, 1H).  $^{13}\text{C NMR}$  (126 MHz,  $\text{CDCl}_3$ )  $\delta$  195.3, 155.0, 144.3, 136.0, 133.9, 133.8, 131.7 (q,  $J = 21.6$  Hz), 130.2, 130.19 (q,  $J = 21.6$  Hz), 130.15, 129.9, 129.8, 128.8, 126.1 (q,  $J = 3.9$  Hz), 125.2 (q,  $J = 3.7$  Hz), 124.0 (q,  $J = 272.6$  Hz), 123.7 (q,  $J = 272.9$  Hz), 123.6, 121.4. Both the  $^1\text{H NMR}$ ,  $^{13}\text{C NMR}$  and  $^{19}\text{F NMR}$  match the literature reported data.<sup>4</sup>

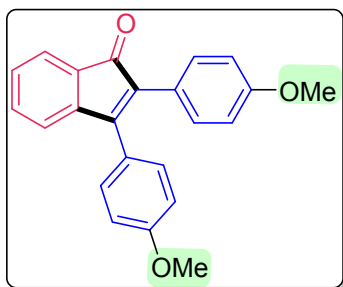

CAS: 41099-25-6

**3p:** Red solid (0.3 mmol scale, 80.3 mg, 78%).  $R_f = 0.20$  (hexane/ethyl acetate = 5:1).  $^1\text{H NMR}$  (500 MHz,  $\text{CDCl}_3$ )  $\delta$  7.57 (d,  $J = 7.0$  Hz, 1H), 7.37 (m, 3H), 7.28 (m, 3H), 7.19 (d,  $J = 7.2$  Hz, 1H), 6.96 (d,  $J = 8.2$  Hz, 2H), 6.84 (d,  $J = 8.3$  Hz, 2H), 3.88 (s, 3H), 3.82 (s, 3H).  $^{13}\text{C NMR}$  (126 MHz,  $\text{CDCl}_3$ )  $\delta$  196.8, 154.8, 145.4, 139.3, 137.5, 133.3, 132.0, 130.9, 129.8, 129.4, 128.8, 128.7, 128.5, 127.9, 122.7, 121.1, 21.5, 21.3. Both the  $^1\text{H NMR}$  and  $^{13}\text{C NMR}$  match the literature reported data.<sup>3</sup>

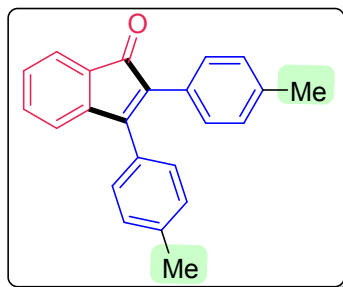

CAS: 41099-26-7

**3q:** Orange solid (0.3 mmol scale, 66.4 mg, 71%).  $R_f = 0.30$  (hexane/ethyl acetate = 10:1).  $^1\text{H NMR}$  (500 MHz,  $\text{CDCl}_3$ )  $\delta$  7.59 (d,  $J = 7.0$  Hz, 1H), 7.38 (t,  $J = 7.5$  Hz, 1H), 7.34 – 7.27 (m, 3H), 7.25 (d,  $J = 7.8$  Hz, 2H), 7.23 – 7.16 (m, 3H), 7.11 (d,  $J = 7.8$  Hz, 2H), 2.43 (s, 3H), 2.35 (s, 3H).  $^{13}\text{C NMR}$  (101 MHz,  $\text{CDCl}_3$ )  $\delta$  196.8, 154.8, 145.4, 139.3, 137.5, 133.3, 132.0, 130.9, 129.8, 129.4, 128.8, 128.7, 128.6, 127.9, 122.8, 121.1, 21.5, 21.3. Both the  $^1\text{H NMR}$  and  $^{13}\text{C NMR}$  match the literature reported data.<sup>3</sup>

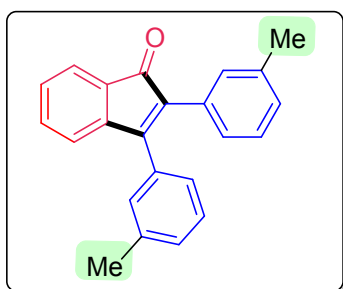

CAS: 112818-89-0

**3r:** Orange solid (0.3 mmol scale, 68.0 mg, 73%).  $R_f = 0.30$  (hexane/ethyl acetate = 10:1).  $^1\text{H NMR}$  (500 MHz,  $\text{CDCl}_3$ )  $\delta$  7.61 (d,  $J = 7.0$  Hz, 1H), 7.40 (t,  $J = 7.4$  Hz, 1H), 7.35 – 7.15 (m, 8H), 7.07 (m, 2H), 2.39 (s, 3H), 2.32 (s, 3H).  $^{13}\text{C NMR}$  (126 MHz,  $\text{CDCl}_3$ )  $\delta$  196.6, 155.4, 145.4, 138.3, 137.5, 133.3, 132.7, 132.3, 130.8, 130.7, 130.6, 130.0, 128.8, 128.6, 128.5, 127.8, 127.0, 125.6, 122.8, 121.2, 21.4 (s). Both the  $^1\text{H NMR}$  and  $^{13}\text{C NMR}$  match the literature reported data.<sup>7</sup>

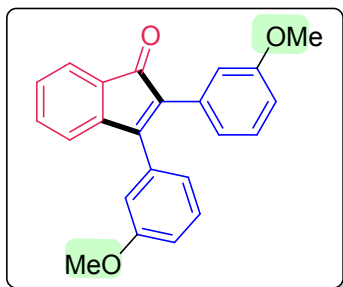

CAS: 1264166-23-5

**3s:** Red solid (0.3 mmol scale, 78.1 mg, 76%).  $R_f = 0.30$  (hexane/ethyl acetate = 5:1).  $^1\text{H NMR}$  (500 MHz,  $\text{CDCl}_3$ )  $\delta$  7.61 (d,  $J = 6.8$  Hz, 1H), 7.40 (t,  $J = 7.3$  Hz, 1H), 7.36 – 7.14 (m, 8H), 7.09 (d,  $J = 7.3$  Hz, 1H), 7.05 (d,  $J = 7.4$  Hz, 1H), 2.39 (s, 3H), 2.32 (s, 3H).  $^{13}\text{C NMR}$  (126 MHz,  $\text{CDCl}_3$ )  $\delta$  196.3, 159.7, 159.1, 155.4, 145.1, 134.0, 133.5, 132.2, 131.9, 130.7, 129.9, 129.01, 128.96, 122.9, 122.4, 121.3, 120.8, 115.1, 114.9, 114.0, 113.7, 55.2, 55.0. Both the  $^1\text{H NMR}$  and  $^{13}\text{C NMR}$  match the literature reported data.<sup>3</sup>

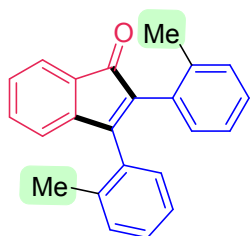

CAS: 1380243-16-2

**3t:** Orange oil (0.3 mmol scale, 36.4 mg, 39%).  $R_f = 0.30$  (hexane/ethyl acetate = 10:1).  $^1\text{H NMR}$  (500 MHz,  $\text{CDCl}_3$ )  $\delta$  7.61 (d,  $J = 6.9$  Hz, 1H), 7.37 (t,  $J = 7.4$  Hz, 1H), 7.32-7.25 (m, 2H), 7.27 – 7.12 (m, 5H), 7.07 (t,  $J = 6.8$  Hz, 1H), 6.96 (d,  $J = 7.6$  Hz, 1H), 6.90 (d,  $J = 7.1$  Hz, 1H), 2.17 (s, 3H), 2.11 (s, 3H).  $^{13}\text{C NMR}$  (101 MHz,  $\text{CDCl}_3$ )  $\delta$  196.3, 157.6, 145.9, 137.1, 135.9, 135.8, 133.5, 131.0, 130.7, 130.6, 130.3, 128.9, 128.9, 128.2, 125.8, 125.4, 122.9, 121.5, 20.7, 20.2. Both the  $^1\text{H NMR}$  and  $^{13}\text{C NMR}$  match the literature reported data.<sup>9</sup>

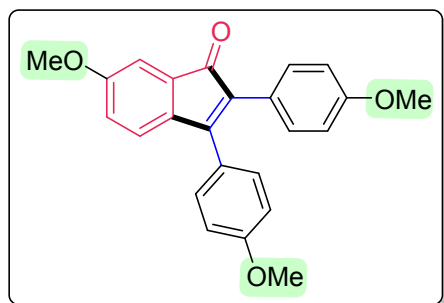

CAS: 114095-38-4

**3u:** Orange solid (0.3 mmol scale, 83.8 mg, 75%).  $R_f = 0.15$  (hexane/ethyl acetate = 3:1).  $^1\text{H NMR}$  (500 MHz,  $\text{CDCl}_3$ )  $\delta$  7.34 (d,  $J = 8.1$  Hz, 2H), 7.20 (d,  $J = 8.1$  Hz, 2H), 7.15 (s, 1H), 7.05 (d,  $J = 7.9$  Hz, 1H), 6.92 (d,  $J = 8.1$  Hz, 2H), 6.81 (d,  $J = 8.1$  Hz, 2H), 6.77 (d,  $J = 8.1$  Hz, 1H), 3.84 (s, 6H), 3.78 (s, 3H).  $^{13}\text{C NMR}$  (126 MHz,  $\text{CDCl}_3$ )  $\delta$  196.5, 160.8, 160.3, 158.8, 154.8, 137.1, 133.2, 131.1, 130.2, 130.1, 125.3, 123.7, 121.9, 116.1, 114.1, 113.6, 110.3, 55.8, 55.3, 55.1. Both the  $^1\text{H NMR}$  and  $^{13}\text{C NMR}$  match the literature reported data.<sup>7</sup>

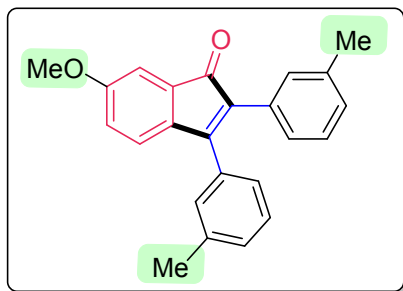

CAS: 2241766-18-5

**3v:** Orange solid (0.3 mmol scale, 87.8 mg, 86%).  $R_f = 0.35$  (hexane/ethyl acetate = 5:1).  $^1\text{H NMR}$  (500 MHz,  $\text{CDCl}_3$ )  $\delta$  7.32 – 7.28 (m, 1H), 7.26 – 7.23 (m, 2H), 7.21 (d,  $J = 2.5$  Hz, 1H), 7.19 – 7.16 (m, 2H), 7.14 (d,  $J = 7.6$  Hz, 1H), 7.07 (dd,  $J = 7.8, 4.3$  Hz, 2H), 7.03 (d,  $J = 7.6$  Hz, 1H), 6.82 (dd,  $J = 8.0, 2.5$  Hz, 1H), 3.87 (s, 3H), 2.38 (s, 3H), 2.31 (s, 3H).  $^{13}\text{C NMR}$  (126 MHz,  $\text{CDCl}_3$ )  $\delta$  196.3, 160.9, 156.4, 138.2, 137.4, 137.0, 132.9, 132.9, 131.3, 130.9, 130.4, 130.0, 128.7, 128.5, 128.2, 127.8, 126.8, 125.6, 122.2, 116.1, 110.5, 55.7, 21.4. Both the  $^1\text{H NMR}$  and  $^{13}\text{C NMR}$  match the literature reported data.<sup>7</sup>

$^{13}\text{C NMR}$  (126 MHz,  $\text{CDCl}_3$ )

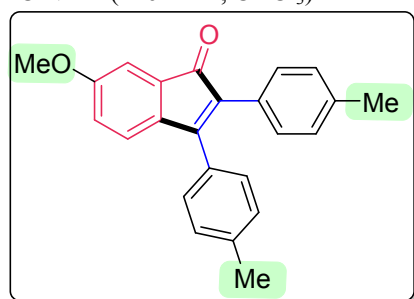

CAS: 2241766-17-4

**3w:** Red solid (0.3 mmol scale, 79.7 mg, 71%).  $R_f = 0.35$  (hexane/ethyl acetate = 5:1).  $^1\text{H NMR}$  (500 MHz,  $\text{CDCl}_3$ )  $\delta$  7.34 – 7.30 (m, 2H), 7.27 – 7.17 (m, 5H), 7.11 (d,  $J = 8.0$  Hz, 2H), 7.07 (d,  $J = 8.0$  Hz, 1H), 6.81 (dd,  $J = 8.0, 2.5$  Hz, 1H), 3.87 (s, 3H), 2.43 (s, 3H), 2.35 (s, 3H).  $^{13}\text{C NMR}$  (126 MHz,  $\text{CDCl}_3$ )  $\delta$  196.4, 160.8, 155.8, 139.3, 137.1, 137.1, 133.1, 131.0, 130.0, 129.6, 129.6, 128.8, 128.4, 128.2, 122.0, 116.1, 110.4, 55.7, 21.5, 21.3. Both the  $^1\text{H NMR}$  and  $^{13}\text{C NMR}$  match the literature reported data.<sup>7</sup>

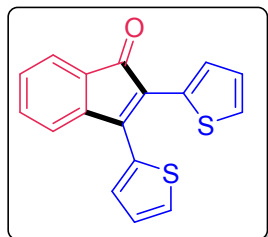

CAS: 131269-31-3

**3x:** Red solid (0.3 mmol scale, 60.0 mg, 68%).  $R_f = 0.25$  (hexane/ethyl acetate = 10:1).  $^1\text{H NMR}$  (500 MHz,  $\text{CDCl}_3$ )  $\delta$  7.58 (dd,  $J = 5.1, 1.2$  Hz, 1H), 7.54 (d,  $J = 7.1$  Hz, 1H), 7.48 (dd,  $J = 3.7, 1.1$  Hz, 1H), 7.41 – 7.32 (m, 3H), 7.28 – 7.19 (m, 3H), 7.02 (dd,  $J = 5.1, 3.7$  Hz, 1H).  $^{13}\text{C NMR}$  (126 MHz,  $\text{CDCl}_3$ )  $\delta$  195.0, 146.0, 145.6, 133.9, 133.1, 132.0, 130.1, 129.3, 129.1, 128.9, 128.8, 127.9, 127.7, 127.3, 127.0, 123.0, 121.3. Both the  $^1\text{H NMR}$  and  $^{13}\text{C NMR}$  match the literature reported data.<sup>8</sup>

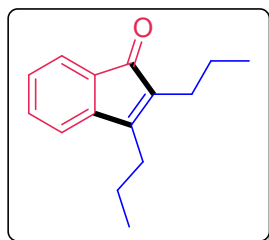

CAS: 147730-15-2

**3y:** Yellow oil (0.3 mmol scale, 34.7 mg, 54%).  $R_f = 0.35$  (hexane/ethyl acetate = 10:1).  $^1\text{H NMR}$  (500 MHz,  $\text{CDCl}_3$ )  $\delta$  7.39 (d,  $J = 7.1$  Hz, 1H), 7.36 – 7.30 (m, 1H), 7.20 – 7.14 (m, 1H), 7.05 (d,  $J = 7.4$  Hz, 1H), 2.54 (t,  $J = 7.6$  Hz, 3H), 2.26 (t,  $J = 7.6$  Hz, 3H), 1.67 (q,  $J = 7.1$  Hz, 2H), 1.52 (q,  $J = 7.3$  Hz, 2H), 1.06 (t,  $J = 7.3$  Hz, 3H), 0.96 (t,  $J = 7.3$  Hz, 3H).  $^{13}\text{C NMR}$  (126 MHz,  $\text{CDCl}_3$ )  $\delta$  198.6, 157.7, 145.7, 134.8, 133.1, 131.1, 127.9, 121.7, 119.0, 28.3, 24.9, 22.5, 21.2, 14.4, 14.2. Both the  $^1\text{H NMR}$  and  $^{13}\text{C NMR}$  match the literature reported data.<sup>3</sup>

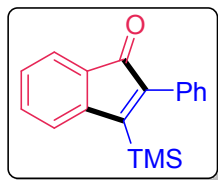

CAS: 182224-30-2

**3z:** Orange solid (0.3 mmol scale, 56.1 mg, 67%).  $R_f = 0.35$  (hexane/ethyl acetate = 10:1).  $^1\text{H NMR}$  (500 MHz,  $\text{CDCl}_3$ )  $\delta$  7.58 (d,  $J = 7.1$  Hz, 1H), 7.50 – 7.43 (m, 4H), 7.37 – 7.27 (m, 4H).  $^{13}\text{C NMR}$  (126 MHz,  $\text{CDCl}_3$ )  $\delta$  197.7, 156.8, 148.6, 147.9, 134.0, 133.3, 130.0, 129.7, 128.2, 129.0, 128.0, 123.14, 123.11. Both the  $^1\text{H NMR}$  and  $^{13}\text{C NMR}$  match the literature reported data.<sup>8</sup>

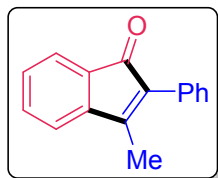

CAS: 10408-73-8

**3aa:** Orange oil (0.3 mmol scale, 45.0 mg, 68%).  $R_f = 0.30$  (hexane/ethyl acetate = 10:1).  $^1\text{H NMR}$  (500 MHz,  $\text{CDCl}_3$ )  $\delta$  7.49 (d,  $J = 7.1$  Hz, 1H), 7.47 – 7.38 (m, 5H), 7.36 – 7.32 (m, 1H), 7.28 – 7.24 (m, 1H), 7.16 (d,  $J = 7.2$  Hz, 1H), 2.32 (s, 3H).  $^{13}\text{C NMR}$  (126 MHz,  $\text{CDCl}_3$ )  $\delta$  196.4, 154.6, 145.9, 133.6, 133.4, 131.2, 130.4, 129.5, 128.9, 128.3, 127.7, 122.1, 119.4, 12.6 (major:minor 5.8:1). Both the  $^1\text{H NMR}$  and  $^{13}\text{C NMR}$  match the literature reported data.<sup>10</sup>

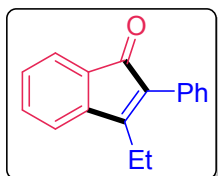

CAS: 13304-50-2

**3ab:** Orange solid (0.3 mmol scale, 42.7 mg, 61%).  $R_f = 0.35$  (hexane/ethyl acetate = 10:1).  $^1\text{H NMR}$  (500 MHz,  $\text{CDCl}_3$ )  $\delta$  7.54 (d,  $J = 7.1$  Hz, 1H), 7.43 (m, 6H), 7.29 (t,  $J = 7.4$  Hz, 1H), 7.23 (d,  $J = 7.3$  Hz, 1H), 2.76 (q,  $J = 7.4$  Hz, 2H), 1.36 (t,  $J = 7.5$  Hz, 3H).  $^{13}\text{C NMR}$  (126 MHz,  $\text{CDCl}_3$ )  $\delta$  196.8, 159.9, 144.9, 133.5, 132.8, 131.2, 130.8, 129.3, 128.7, 128.3, 127.7, 122.3, 119.8, 20.0, 12.8 (major:minor 14:1). Both the  $^1\text{H NMR}$  and  $^{13}\text{C NMR}$  match the literature reported data.<sup>11</sup>

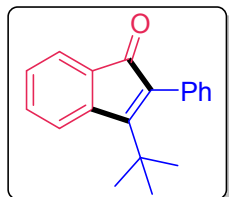

**3ac:** Yellow solid (0.3 mmol scale, 42.5 mg, 54%). Melting point: 124–126 °C.  $R_f = 0.30$  (hexane/ethyl acetate = 10:1).  $^1\text{H NMR}$  (500 MHz,  $\text{CDCl}_3$ )  $\delta$  7.57 – 7.53 (m, 2H), 7.43 (td,  $J = 7.7, 1.3$  Hz, 1H), 7.41 – 7.34 (m, 3H), 7.29 – 7.24 (m, 1H), 7.21 – 7.17 (m, 2H), 1.33 (s, 9H).  $^{13}\text{C NMR}$  (126 MHz,  $\text{CDCl}_3$ )  $\delta$  198.0, 164.3, 145.1, 134.2, 133.9, 133.2, 131.4, 130.2, 128.0, 127.5, 127.4, 123.9, 122.4, 36.2, 30.4. **HRMS** (ESI): Calculated for  $\text{C}_{19}\text{H}_{19}\text{O}$  ( $\text{M}+\text{H}^+$ ): 263.1430, found: 263.1429.

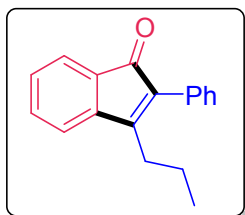

CAS: 13304-58-0

**3ad:** Yellow oil (0.3 mmol scale, 52.9 mg, 71%).  $R_f = 0.40$  (hexane/ethyl acetate = 10:1).  $^1\text{H NMR}$  (500 MHz,  $\text{CDCl}_3$ )  $\delta$  7.49 (d,  $J = 7.1$  Hz, 1H), 7.46 – 7.32 (m, 6H), 7.28 – 7.22 (m, 1H), 7.18 (d,  $J = 7.2$  Hz, 1H), 2.73 – 2.63 (m, 2H), 1.77 – 1.68 (m, 2H), 1.02 (t,  $J = 7.4$  Hz, 3H).  $^{13}\text{C NMR}$  (126 MHz,  $\text{CDCl}_3$ )  $\delta$  196.7, 158.6, 145.2, 133.49, 133.46, 131.3, 130.7, 129.4, 128.7, 128.3, 127.7, 122.3, 119.9, 28.8, 21.6, 14.5. Both the  $^1\text{H NMR}$  and  $^{13}\text{C NMR}$  match the literature reported data.<sup>12</sup>

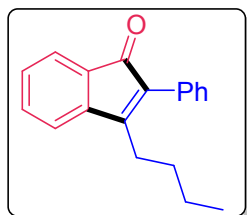

CAS: 5041-48-5

**3ae:** Orange oil (0.3 mmol scale, 61.4 mg, 78%).  $R_f = 0.35$  (hexane/ethyl acetate = 10:1).  $^1\text{H NMR}$  (500 MHz,  $\text{CDCl}_3$ )  $\delta$  7.53 (d,  $J = 7.0$  Hz, 1H), 7.49 – 7.35 (m, 6H), 7.28 (td,  $J = 7.3, 0.9$  Hz, 1H), 7.22 (d,  $J = 7.2$  Hz, 1H), 2.74 (t,  $J = 7.9$  Hz, 2H), 1.78 – 1.67 (m, 2H), 1.48 (dt,  $J = 14.9, 7.4$  Hz, 2H), 0.96 (t,  $J = 7.3$  Hz, 3H).  $^{13}\text{C NMR}$  (126 MHz,  $\text{CDCl}_3$ )  $\delta$  196.7, 158.9, 145.2, 133.5, 133.3, 131.3, 130.7, 129.4, 128.7, 128.3, 127.7, 122.3, 119.9, 30.3, 26.5, 23.0, 13.8. Both the  $^1\text{H NMR}$  and  $^{13}\text{C NMR}$  match the literature reported data.<sup>13</sup>

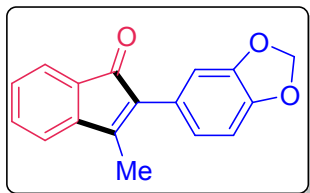

**3af:** Red solid (0.3 mmol scale, 57.9 mg, 73%). Melting point: 121-123 °C.  $R_f = 0.35$  (hexane/ethyl acetate = 3:1).  $^1\text{H NMR}$  (500 MHz,  $\text{CDCl}_3$ )  $\delta$  7.49 (d,  $J = 7.0$  Hz, 1H), 7.43 (td,  $J = 7.5, 1.2$  Hz, 1H), 7.29 – 7.24 (m, 1H), 7.16 (d,  $J = 7.2$  Hz, 1H), 6.95 (t,  $J = 1.0$  Hz, 1H), 6.92 (t,  $J = 1.3$  Hz, 2H), 6.01 (s, 2H), 2.32 (s, 3H).  $^{13}\text{C NMR}$  (126 MHz,  $\text{CDCl}_3$ )  $\delta$  196.5, 153.7, 147.5, 147.2, 145.9, 133.6, 133.0, 130.3, 128.7, 124.9, 123.5, 122.1, 119.3, 109.9, 108.3, 101.1, 12.6. **HRMS** (ESI): Calculated for  $\text{C}_{17}\text{H}_{13}\text{O}_3$  ( $\text{M}+\text{H}^+$ ): 265.0859, found: 265.0859.



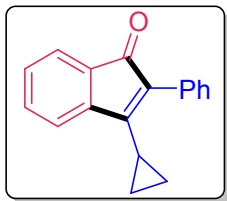

CAS: 2139334-97-5

**3ag:** Orange oil (0.3 mmol scale, 48.0 mg, 65%).  $R_f = 0.35$  (hexane/ethyl acetate = 10:1).  $^1\text{H NMR}$  (500 MHz,  $\text{CDCl}_3$ )  $\delta$  7.67 – 7.42 (m, 5H), 7.38 (m, 2H), 7.27 (td,  $J = 7.6, 2.6$  Hz, 1H), 7.18 (dd,  $J = 7.4, 2.7$  Hz, 1H), 2.18 – 2.12 (m, 1H), 1.21 – 0.97 (m, 4H).  $^{13}\text{C NMR}$  (126 MHz,  $\text{CDCl}_3$ )  $\delta$  196.3, 159.6, 144.1, 133.8, 133.4, 131.2, 131.1, 129.9, 128.7, 128.0, 127.6, 122.2, 120.5, 11.3, 8.1. Both the  $^1\text{H NMR}$  and  $^{13}\text{C NMR}$  match the literature reported data.<sup>14</sup>

### 3.4 Synthesis of Estrone-derived indenone

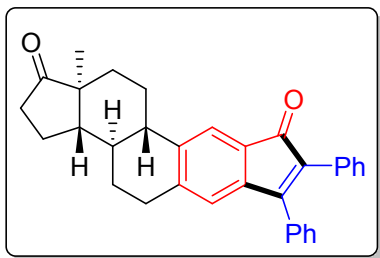

A flame-dried 15.0 mL vial were charged with **4** which was prepared from estrone according to the reported procedure (0.3 mmol, 120.6 mg, 1.0 equiv.) and diphenylacetylene **2a** (0.6 mmol, 106.8mg, 2.0 equiv). The vial was directly transferred into a nitrogen-filled glovebox without caps. Then,  $\text{Ni}(\text{cod})_2$  (8.3 mg, 0.03 mmol, 10 mol%),  $\text{dppe}$  (12.0 mg, 0.03 mmol, 10 mol%),  $\text{TMP}$  (42.4 mg, 0.3 mmol, 1.0 equiv.) and 3.0 mL dry Ph-F were added. The vial was tightly sealed, transferred out of glovebox and stirred at 100 °C for 24 hours. After completion of the reaction, the mixture was filtered through a thin pad of silica gel and washed with EtOAc. The solvent was removed *in vacuo* and the residue was purified by flash column chromatography on silica gel to give the desired indenone **5**.

**5:** Red solid (0.3 mmol scale, 114.0 mg, 83%).  $R_f = 0.30$  (hexane/ethyl acetate = 3:1). Melting point: 231-233 °C.  $^1\text{H NMR}$  (500 MHz,  $\text{CDCl}_3$ )  $\delta$  7.59 (s, 1H), 7.41 (m, 5H), 7.32 – 7.22 (m, 5H), 6.87 (s, 1H), 2.90 (dd,  $J = 9.2, 4.2$  Hz, 2H), 2.59 – 2.48 (m, 2H), 2.32 (t,  $J = 8.9$  Hz, 1H), 2.25 – 2.13 (m, 1H), 2.12 – 1.98 (m, 3H), 1.73 – 1.47 (m, 6H), 0.95 (s, 3H).  $^{13}\text{C NMR}$  (126 MHz,  $\text{CDCl}_3$ )  $\delta$  196.4, 155.0, 142.7, 142.4, 140.4, 132.9, 132.6, 130.91, 129.88, 129.1,

128.8, 128.7, 128.4, 128.0, 127.6, 122.3, 120.7, 50.3, 47.9, 44.5, 38.0, 35.8, 31.5, 30.3, 26.1, 25.8, 21.5, 13.8.

**HRMS** (ESI): Calculated for  $C_{33}H_{31}O_2$  ( $M+H^+$ ): 459.2319, found: 459.2319.

#### 4. References

- (1) Yu, Y.; Chakraborty, P.; Song, J.; Zhu, L.; Li, C.; Huang, X. *Nat. Commun.* **2020**, *11*, 461.
- (2) Dooley, J. D.; Reddy Chidipudi, S.; Lam, H. W. *J. Am. Chem. Soc.* **2013**, *135*, 10829-10836.
- (3) Song, J.; Sun, H.; Sun, W.; Fan, Y.; Li, C.; Wang, H.; Xiao, K.; Qian, Y. S. *Adv. Synth. Catal.* **2019**, *361*, 5521-5527.
- (4) Li, B.-J.; Wang, H.-Y.; Zhu, Q.-L.; Shi, Z.-J. *Angew. Chem. Int. Ed.* **2012**, *51*, 3948-3952.
- (5) Yu, W.; Zhang, W.; Liu, Z.; Zhang, Y. *Chem. Commun.* **2016**, *52*, 6837-6840.
- (6) Pletnev, A. A.; Tian, Q.; Larock, R. C. *J. Org. Chem.* **2002**, *67*, 9276-9287.
- (7) Ramesh, K.; Satyanarayana, G. *Eur. J. Org. Chem.* **2018**, *2018*, 4135-4146.
- (8) Qi, Z.; Wang, M.; Li, X. *Org. Lett.* **2013**, *15*, 5440-5443.
- (9) Yu, X.; Geng, S.; Liu, G.; Guo, W.; Wang, J. *J. Organomet. Chem.* **2019**, *879*, 139-143.
- (10) Chen, S.; Yu, J.; Jiang, Y.; Chen, F.; Cheng. *J. Org. Lett.* **2013**, *15*, 4754-4757.
- (11) Guo, W.; Wu, S.; Wang, T.; Xie, Q.; Duan, Y.; Luo, S.; Wang, J.; Yu, X. *Org. Chem. Front.* **2018**, *5*, 1613-1621.
- (12) Ueda, M.; Ueno, T.; Suyama, Y.; Ryu, I. *Chem. Commun.* **2016**, *52*, 13237-13240.
- (13) Morimoto, T.; Yamasaki, K.; Hirano, A.; Tsutsumi, K.; Kagawa, N.; Kakiuchi, K.; Harada, Y.; Fukumoto, Y.; Chatani, N.; Nishioka, T. *Org. Lett.* **2009**, *11*, 1777-1780.
- (14) Ren, H.; Miao, M.; Xu, H.; Luo, Y.; Jin, M.; Chen, Z.; Xu, J.; Ren, H. *Synthesis.* **2018**, *50*, 349-360.

## 5. NMR Spectra

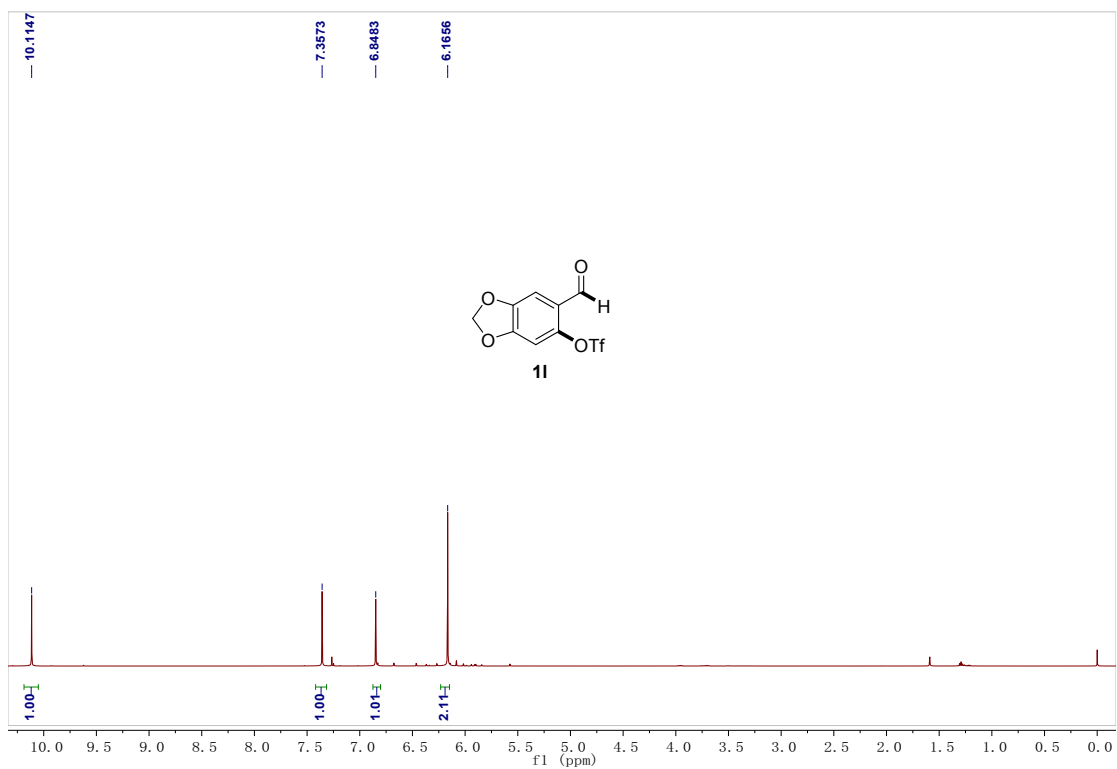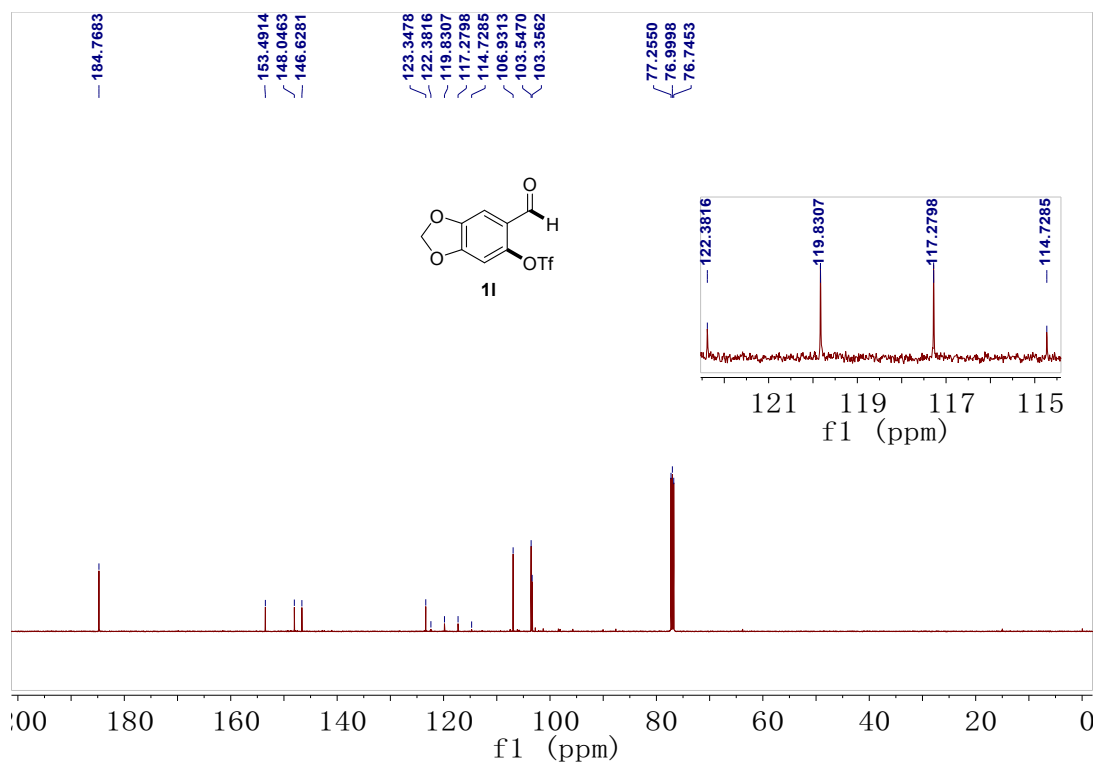

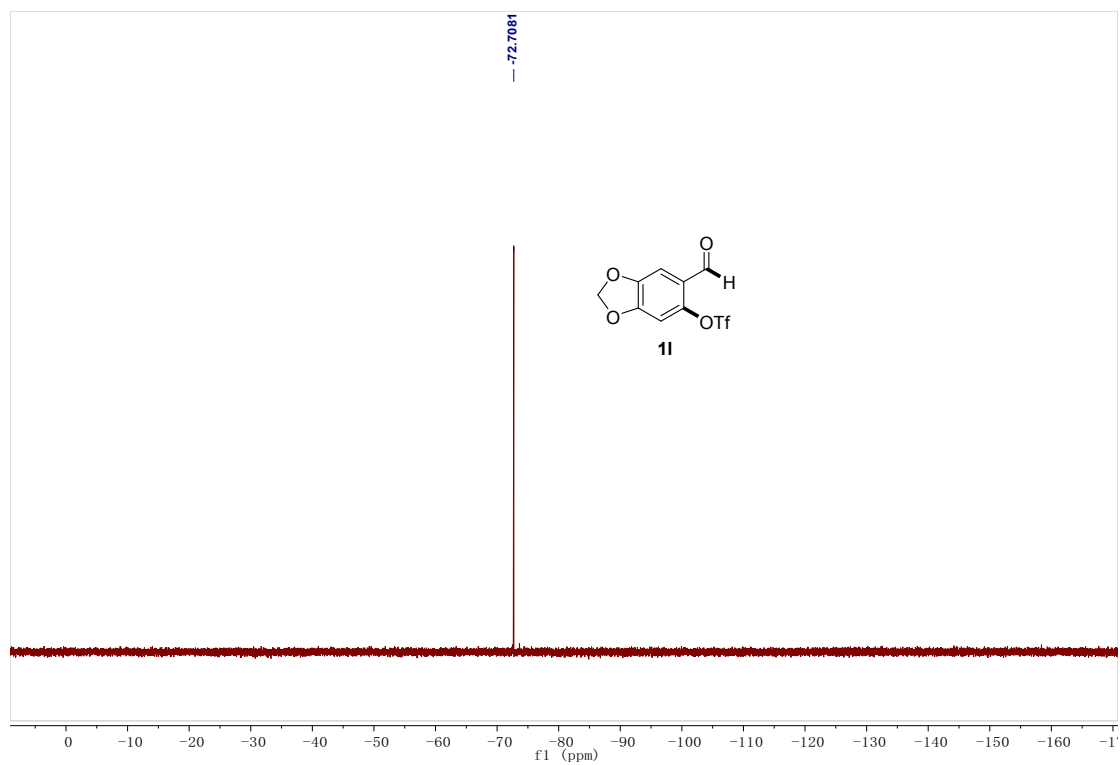

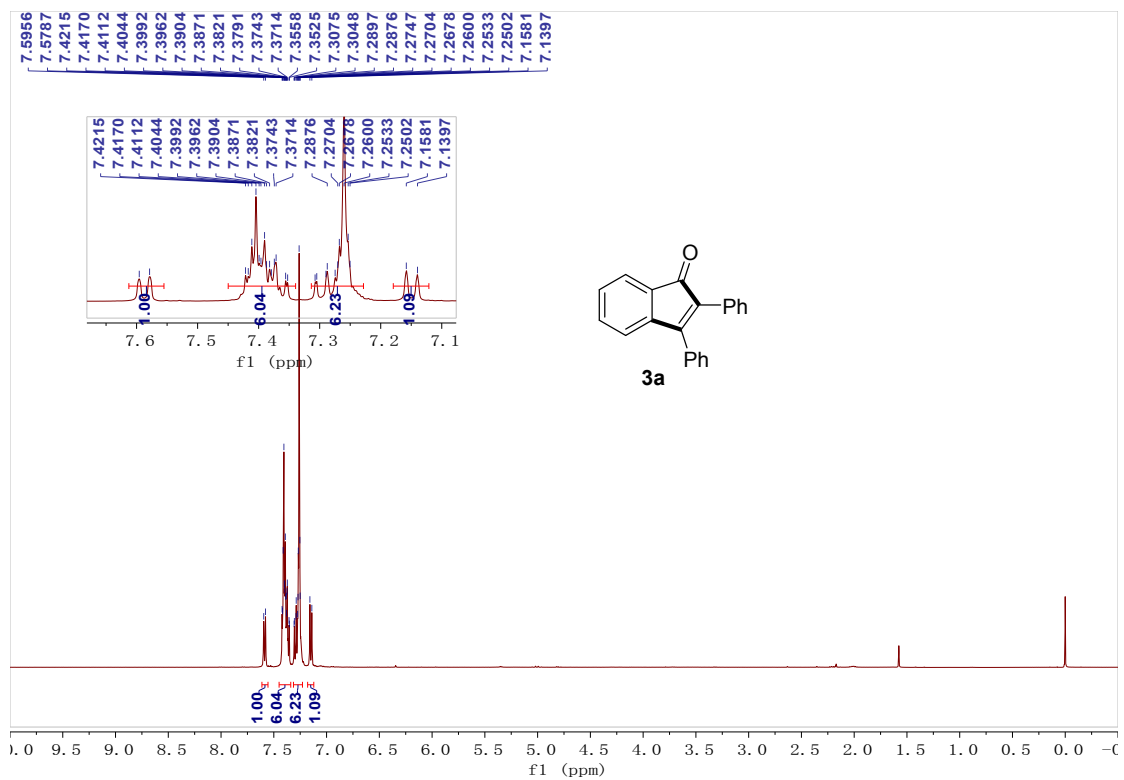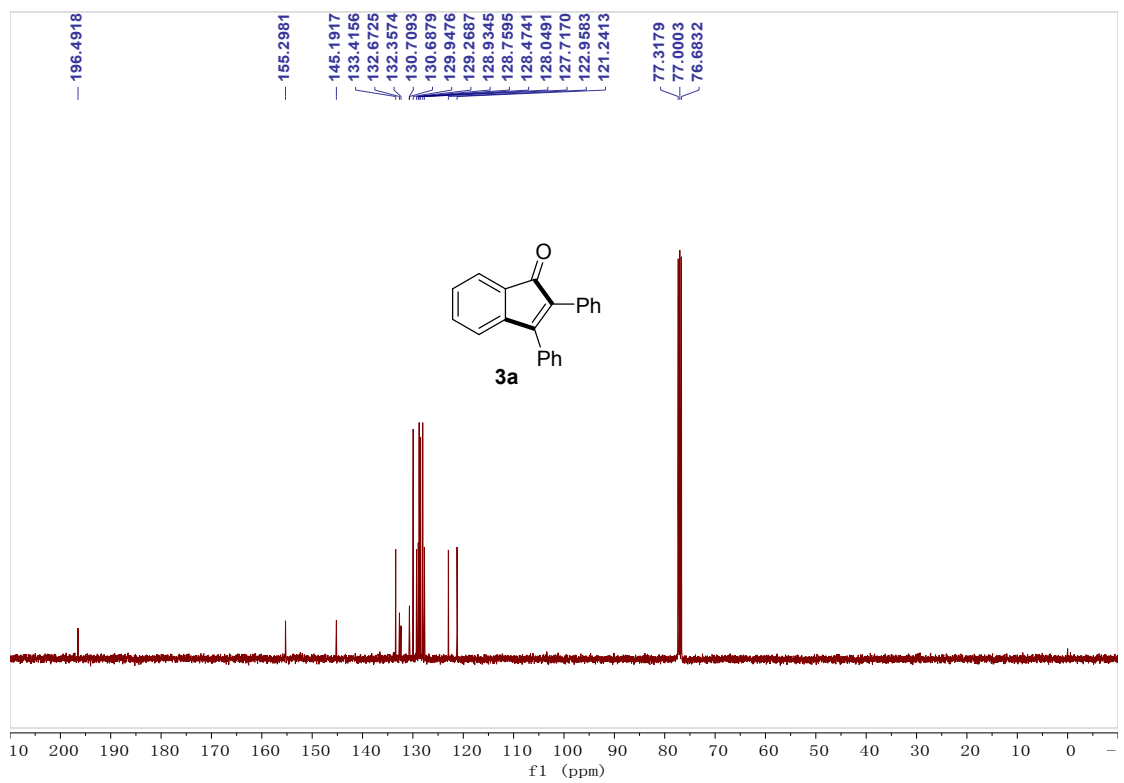

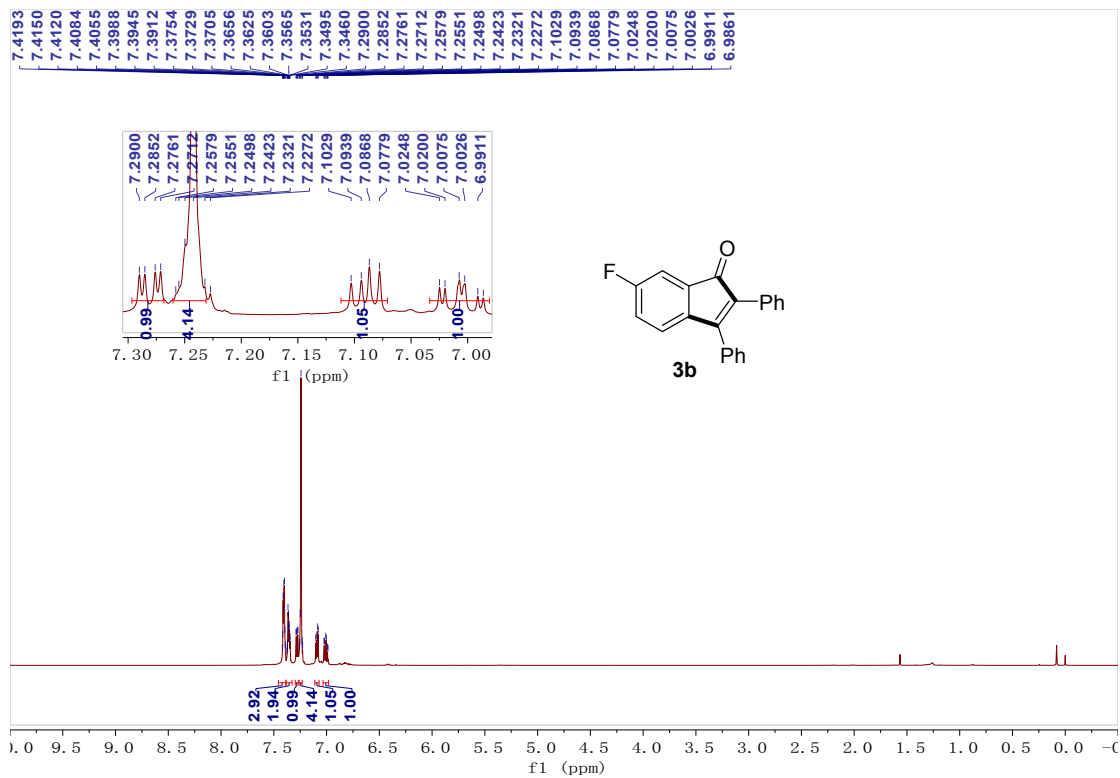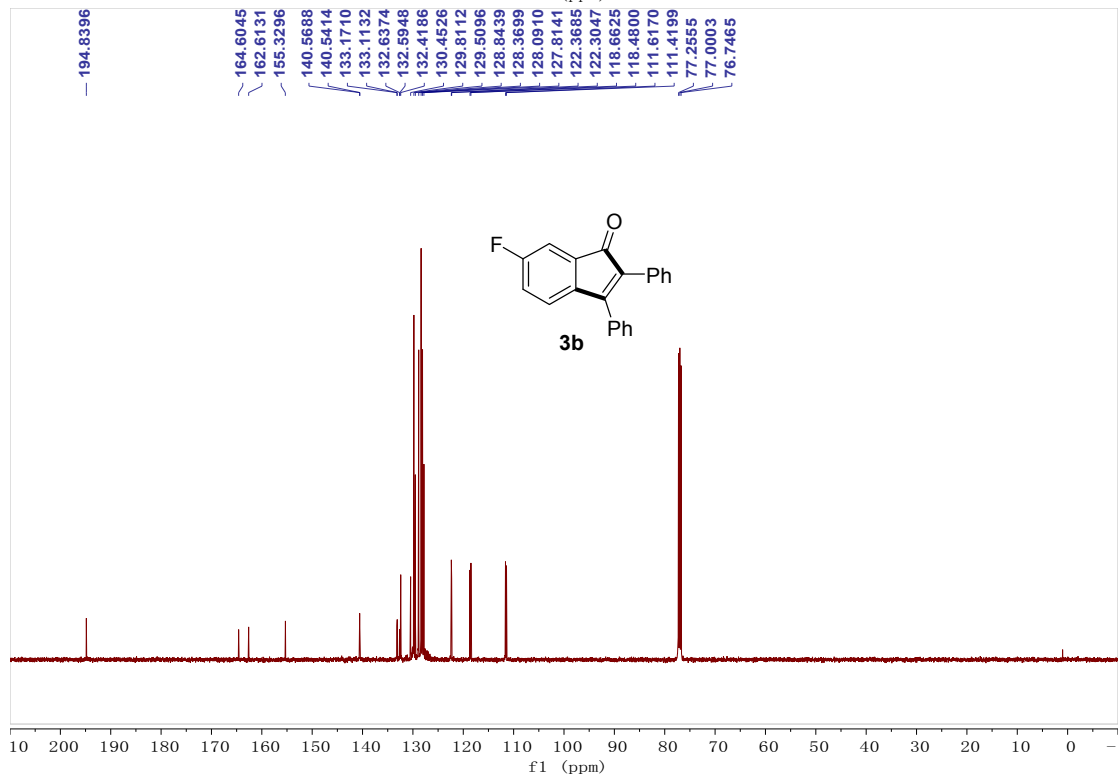

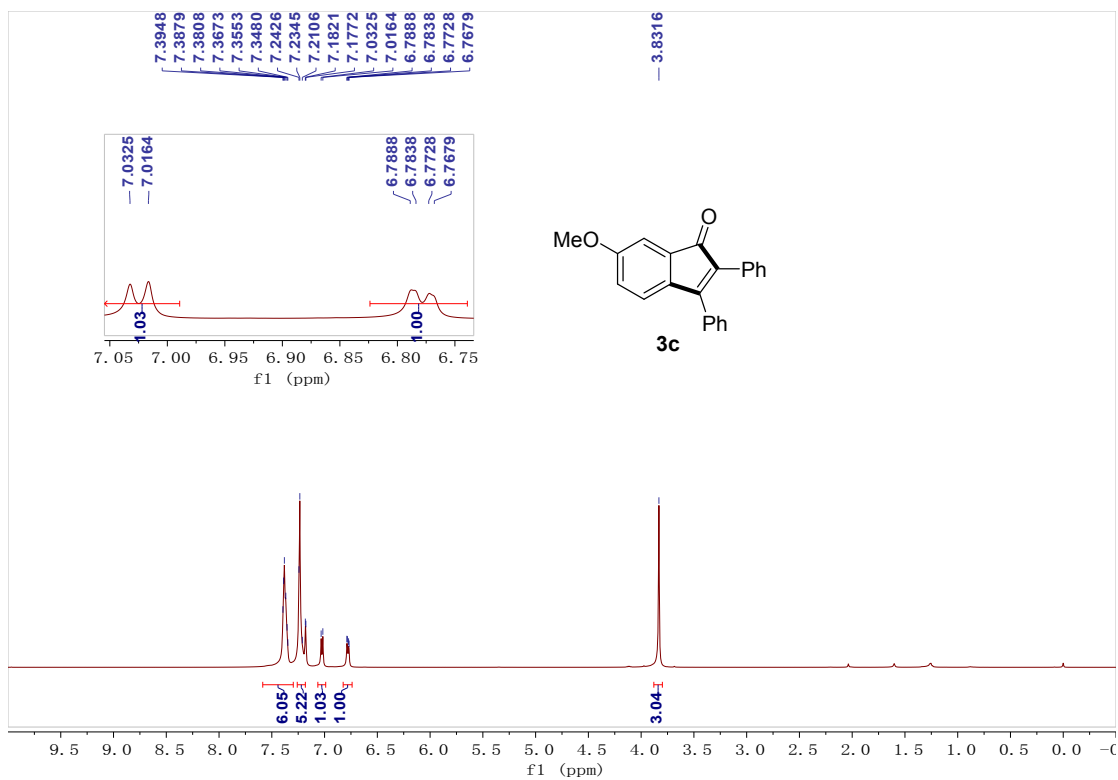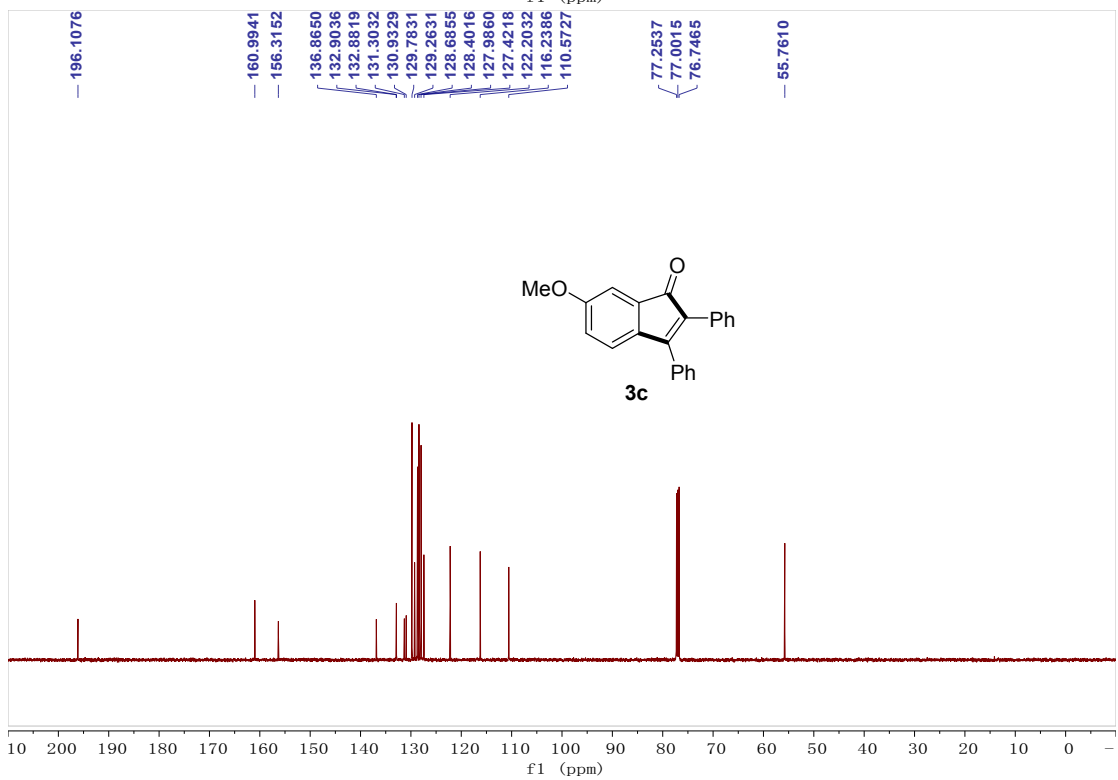

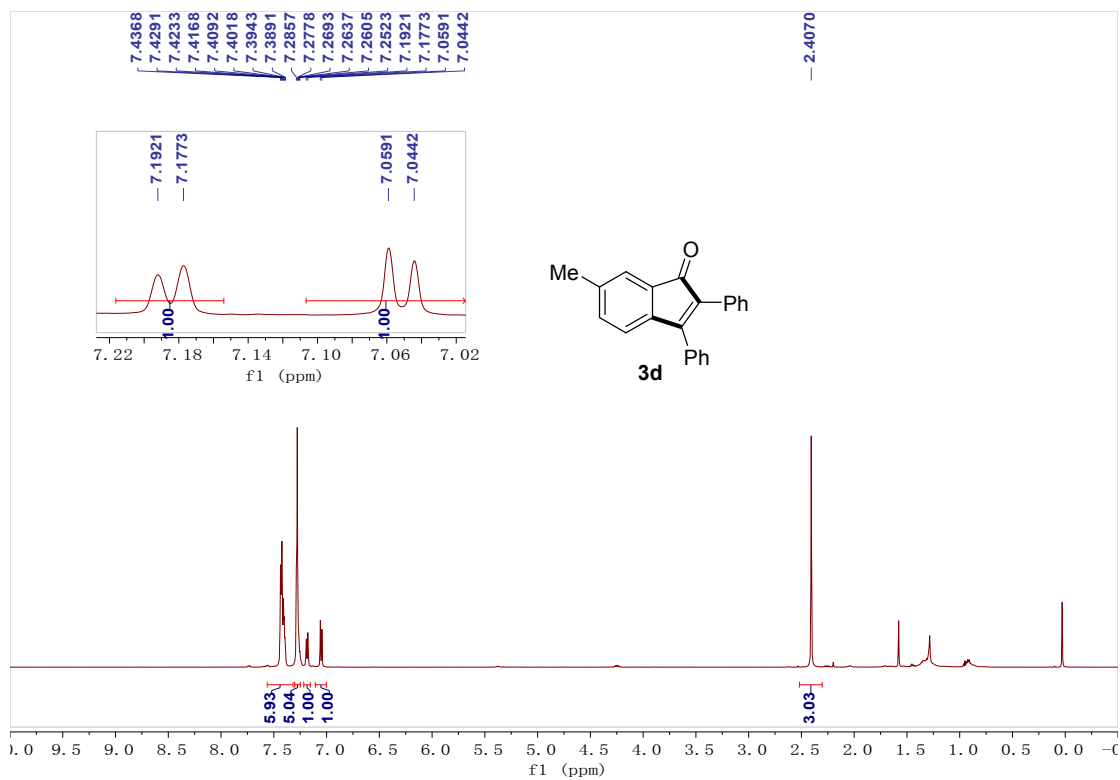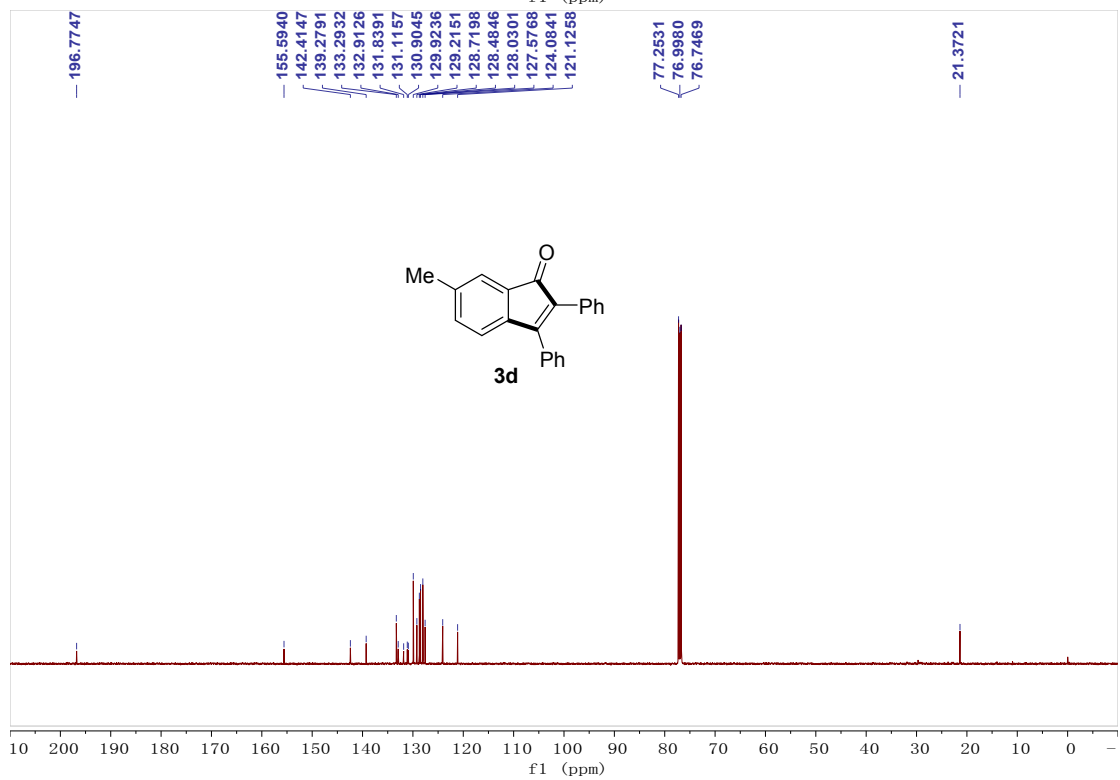



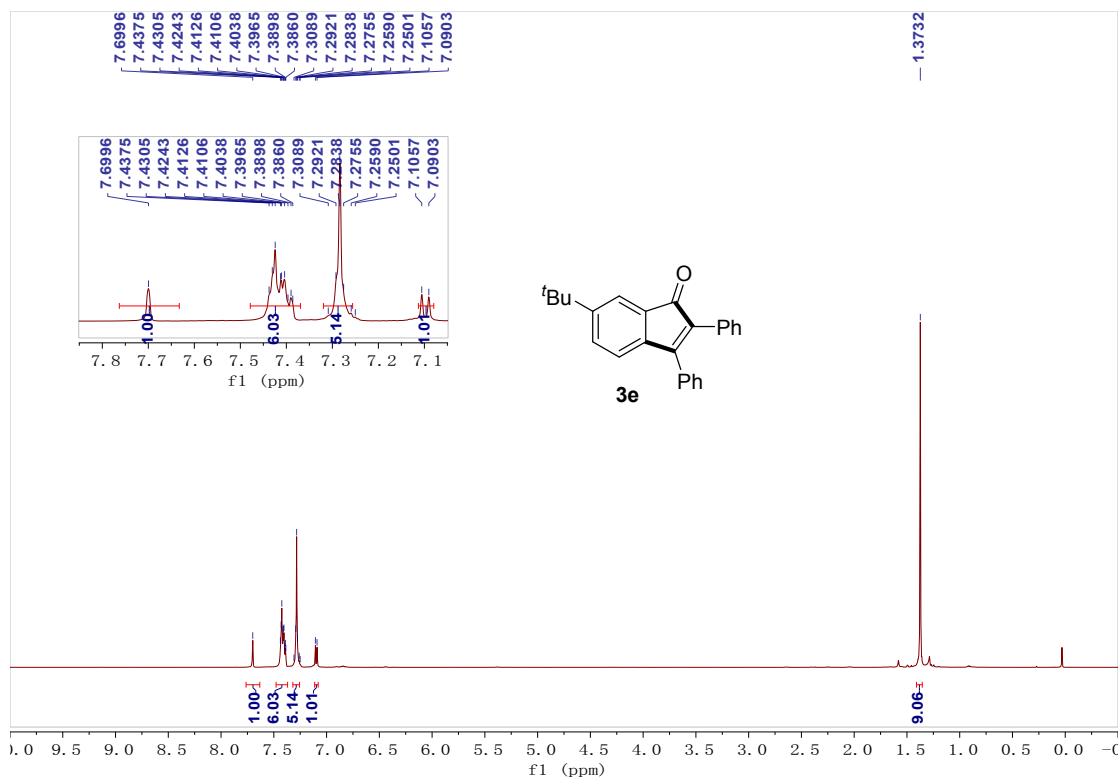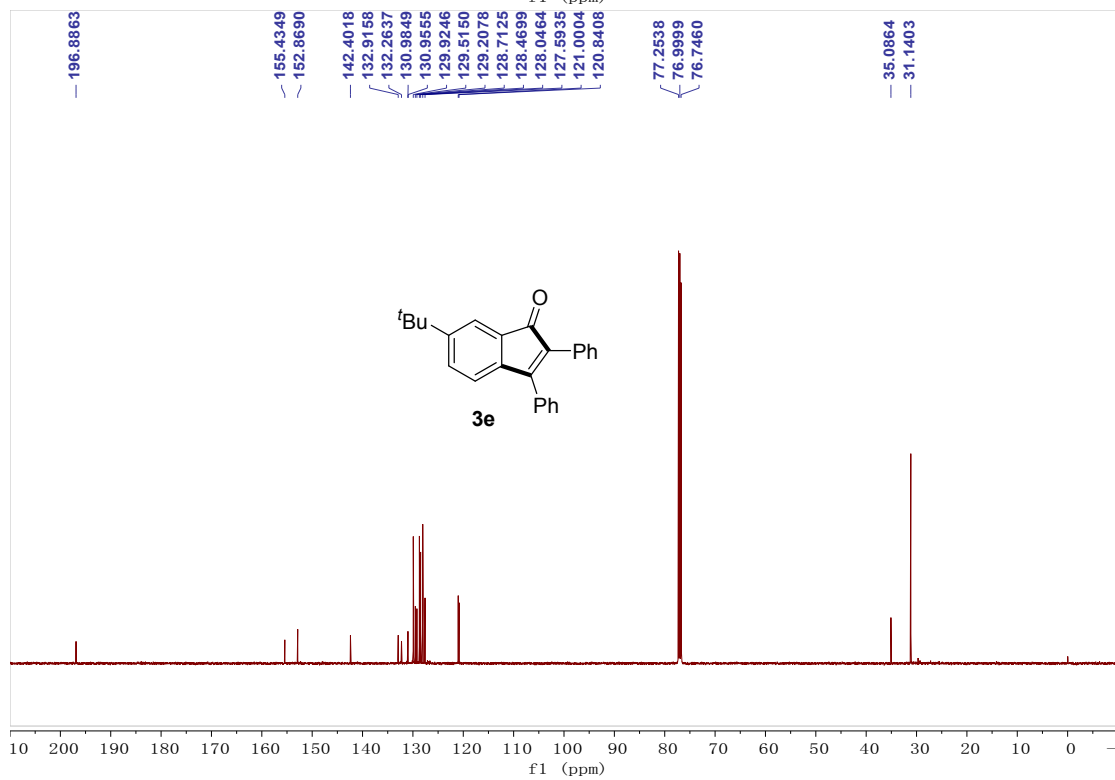

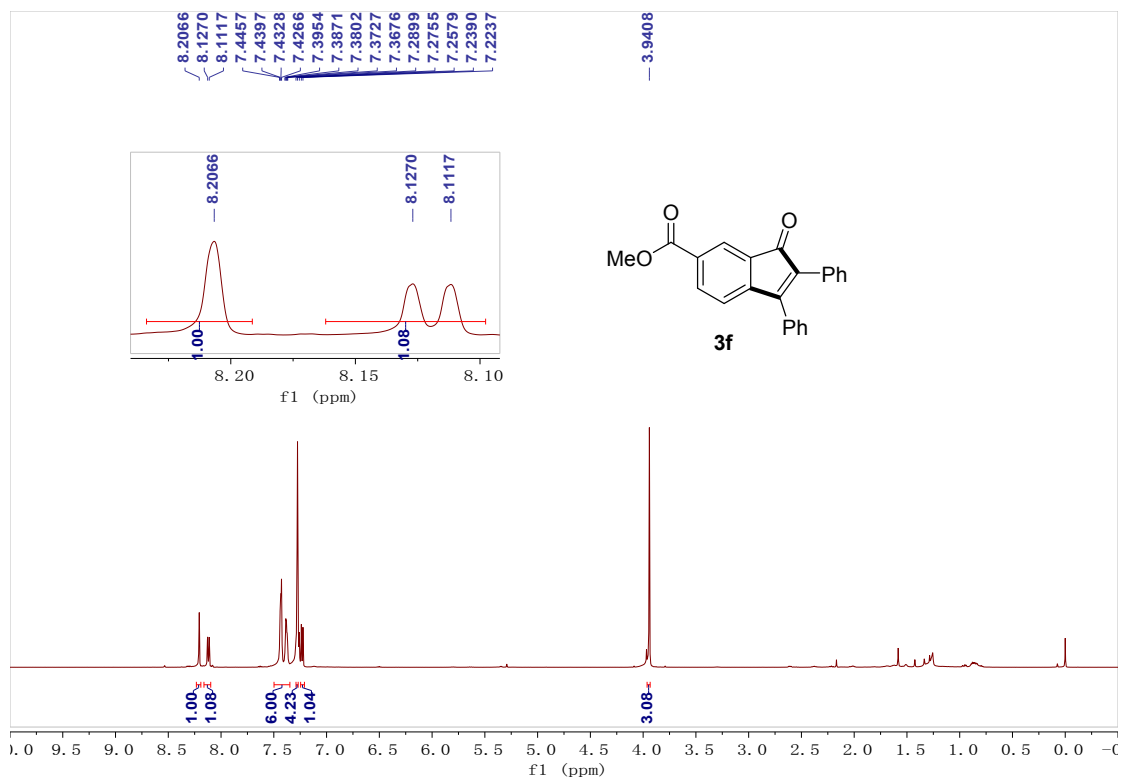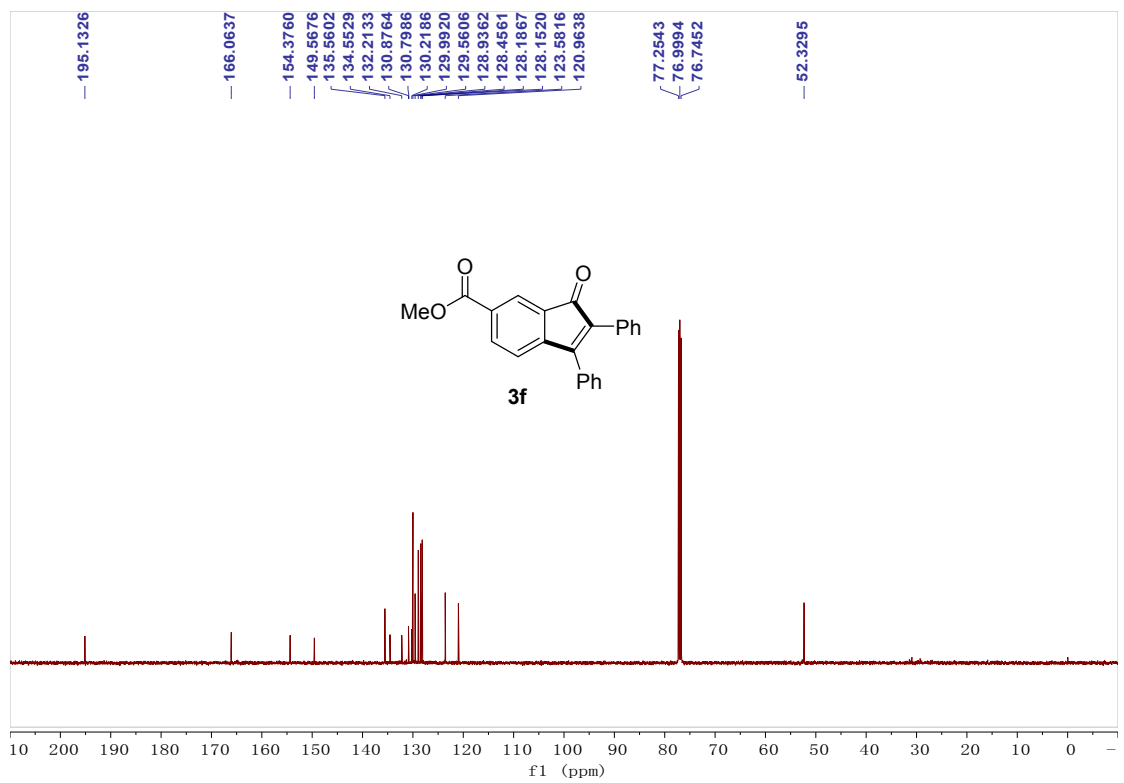

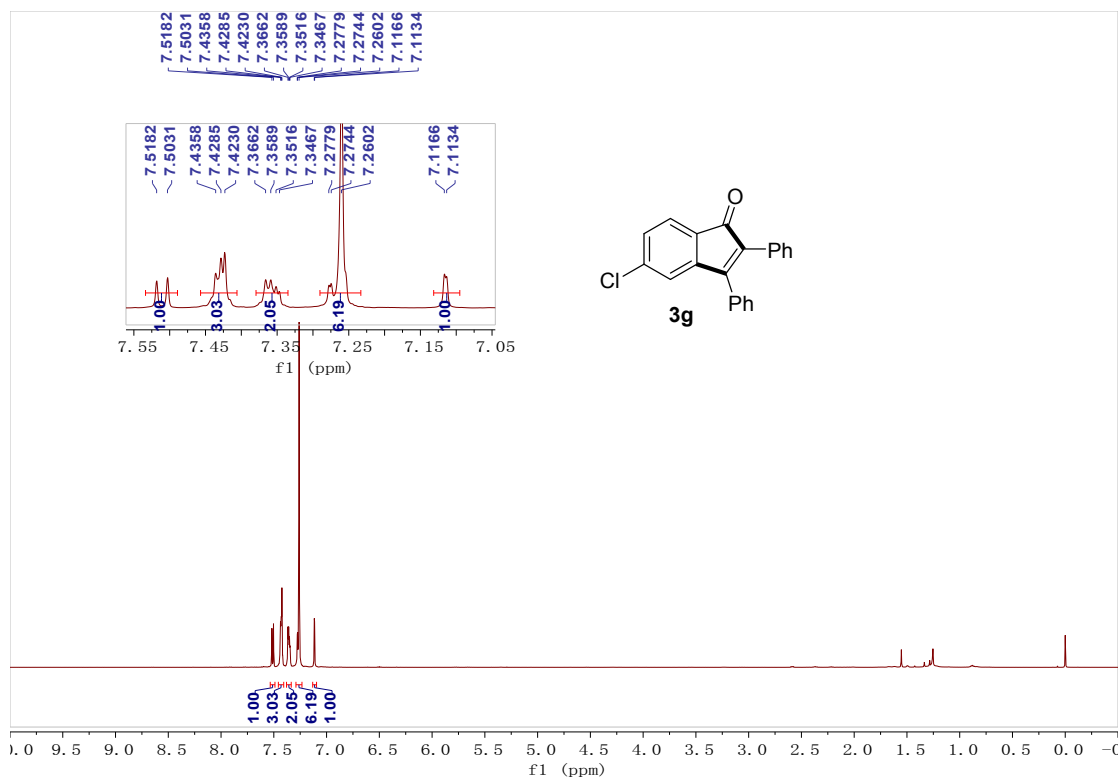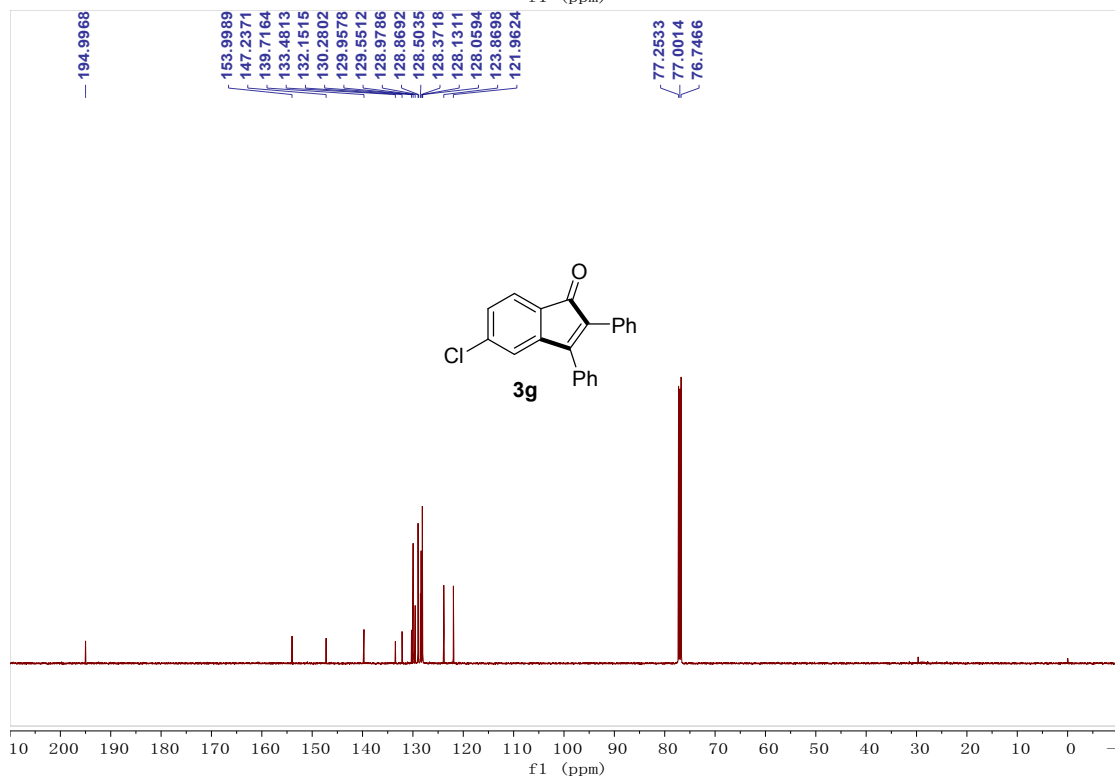

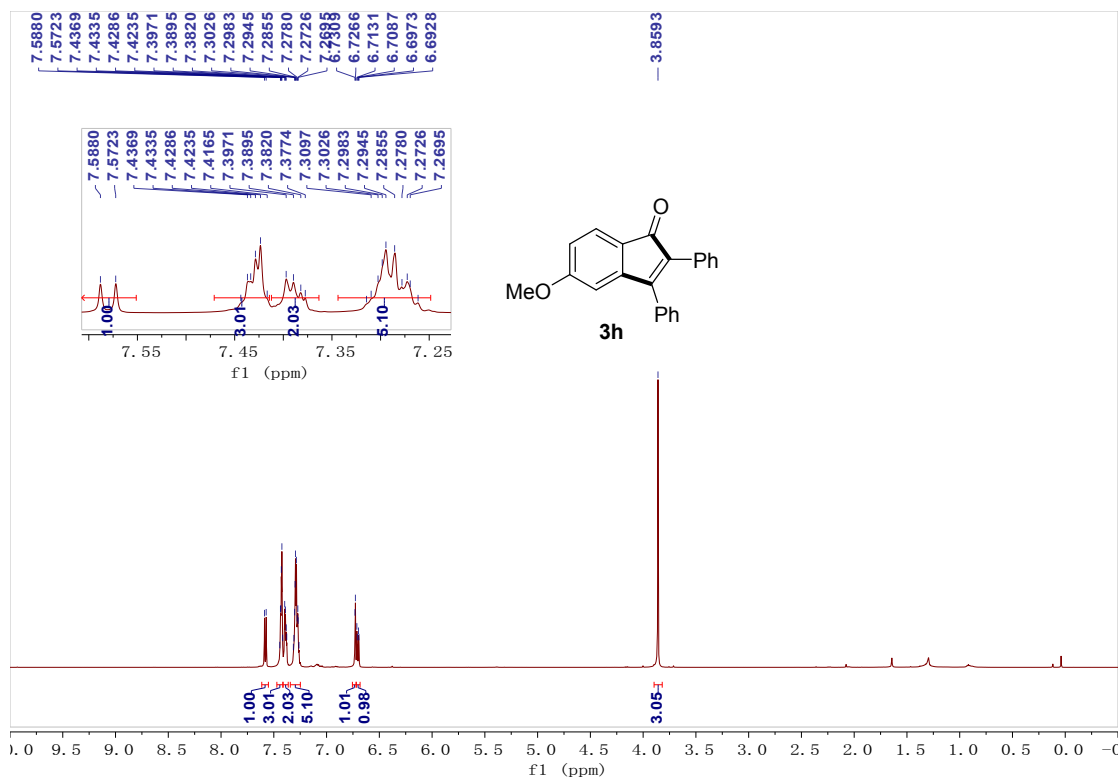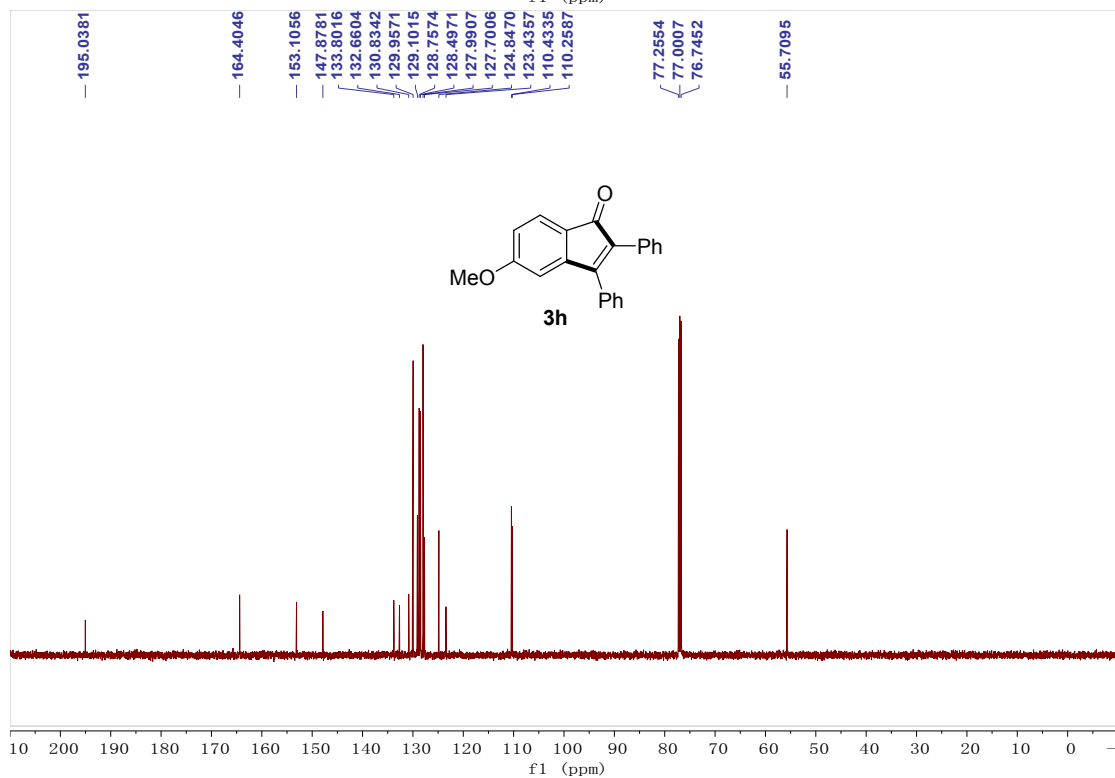

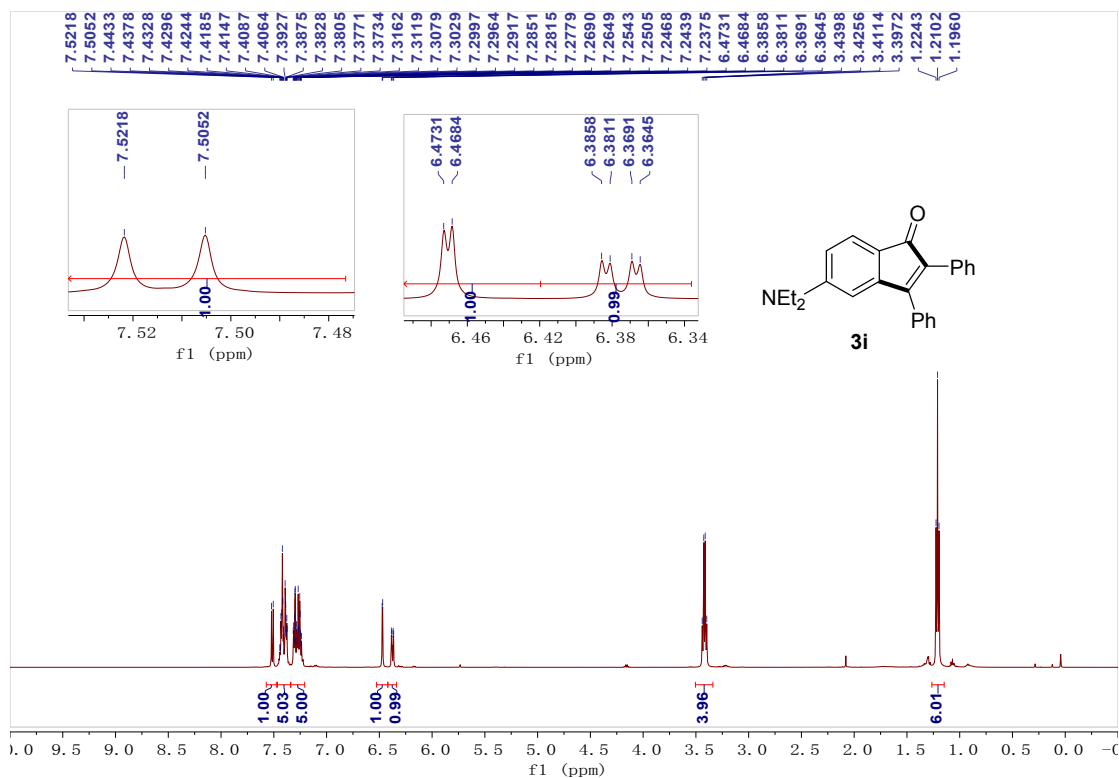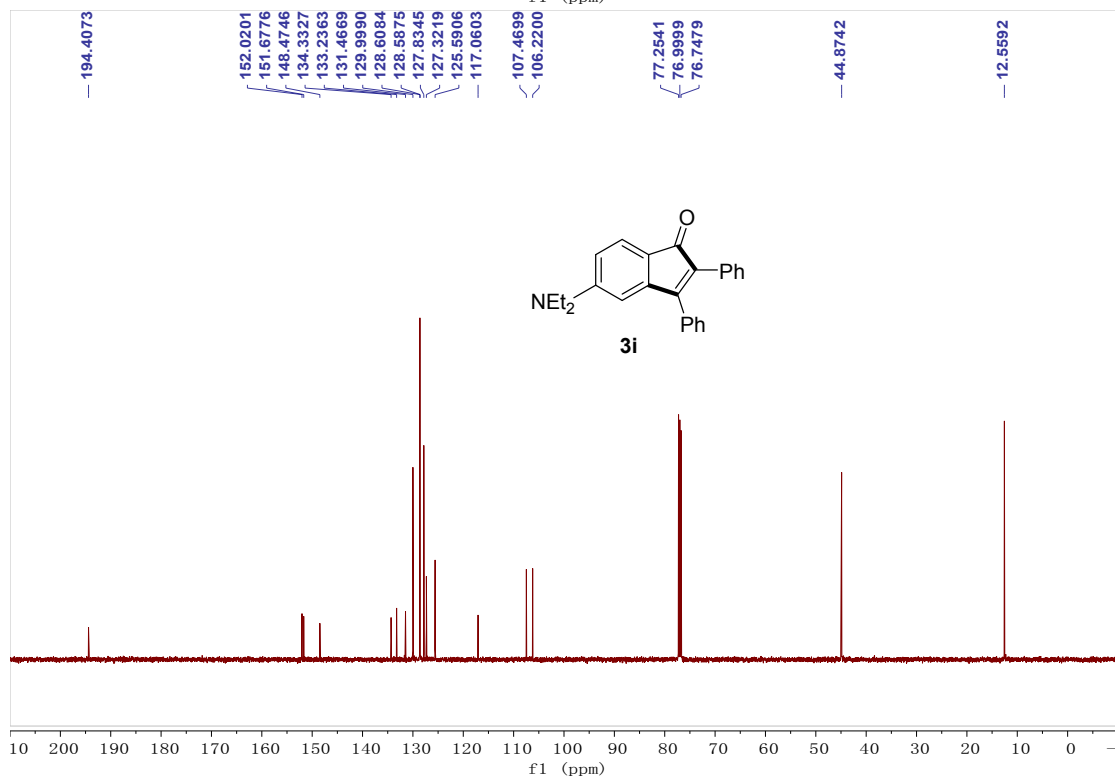

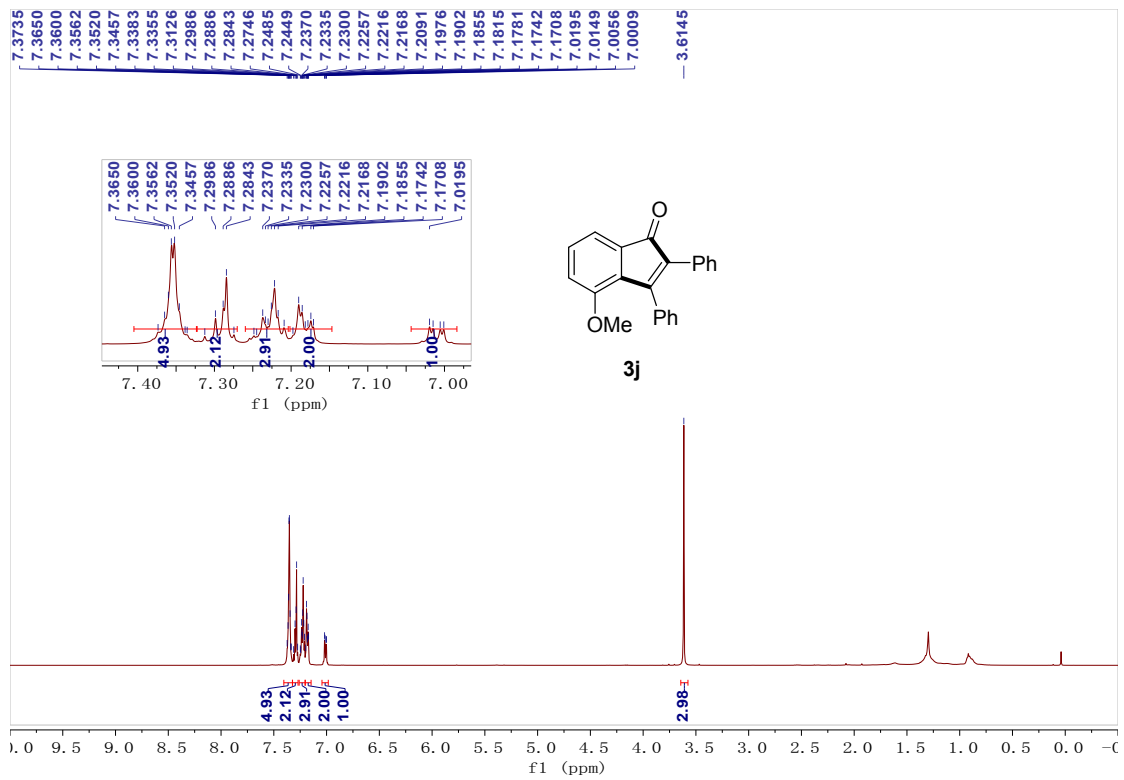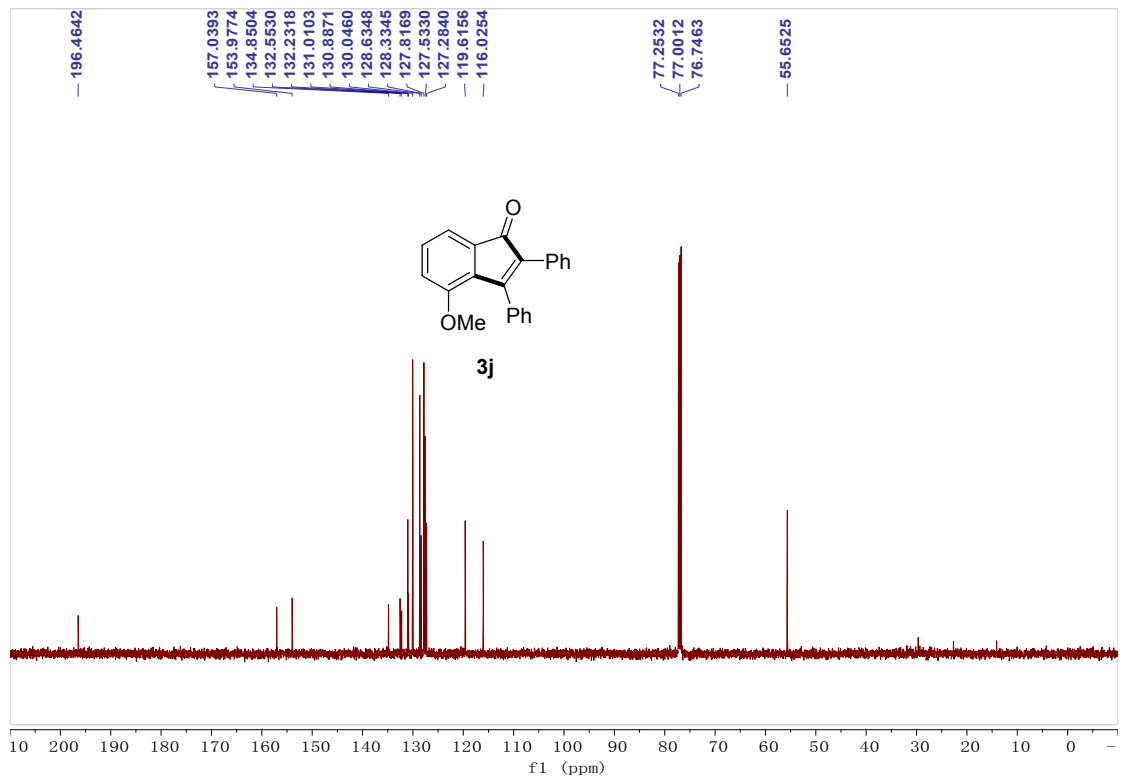

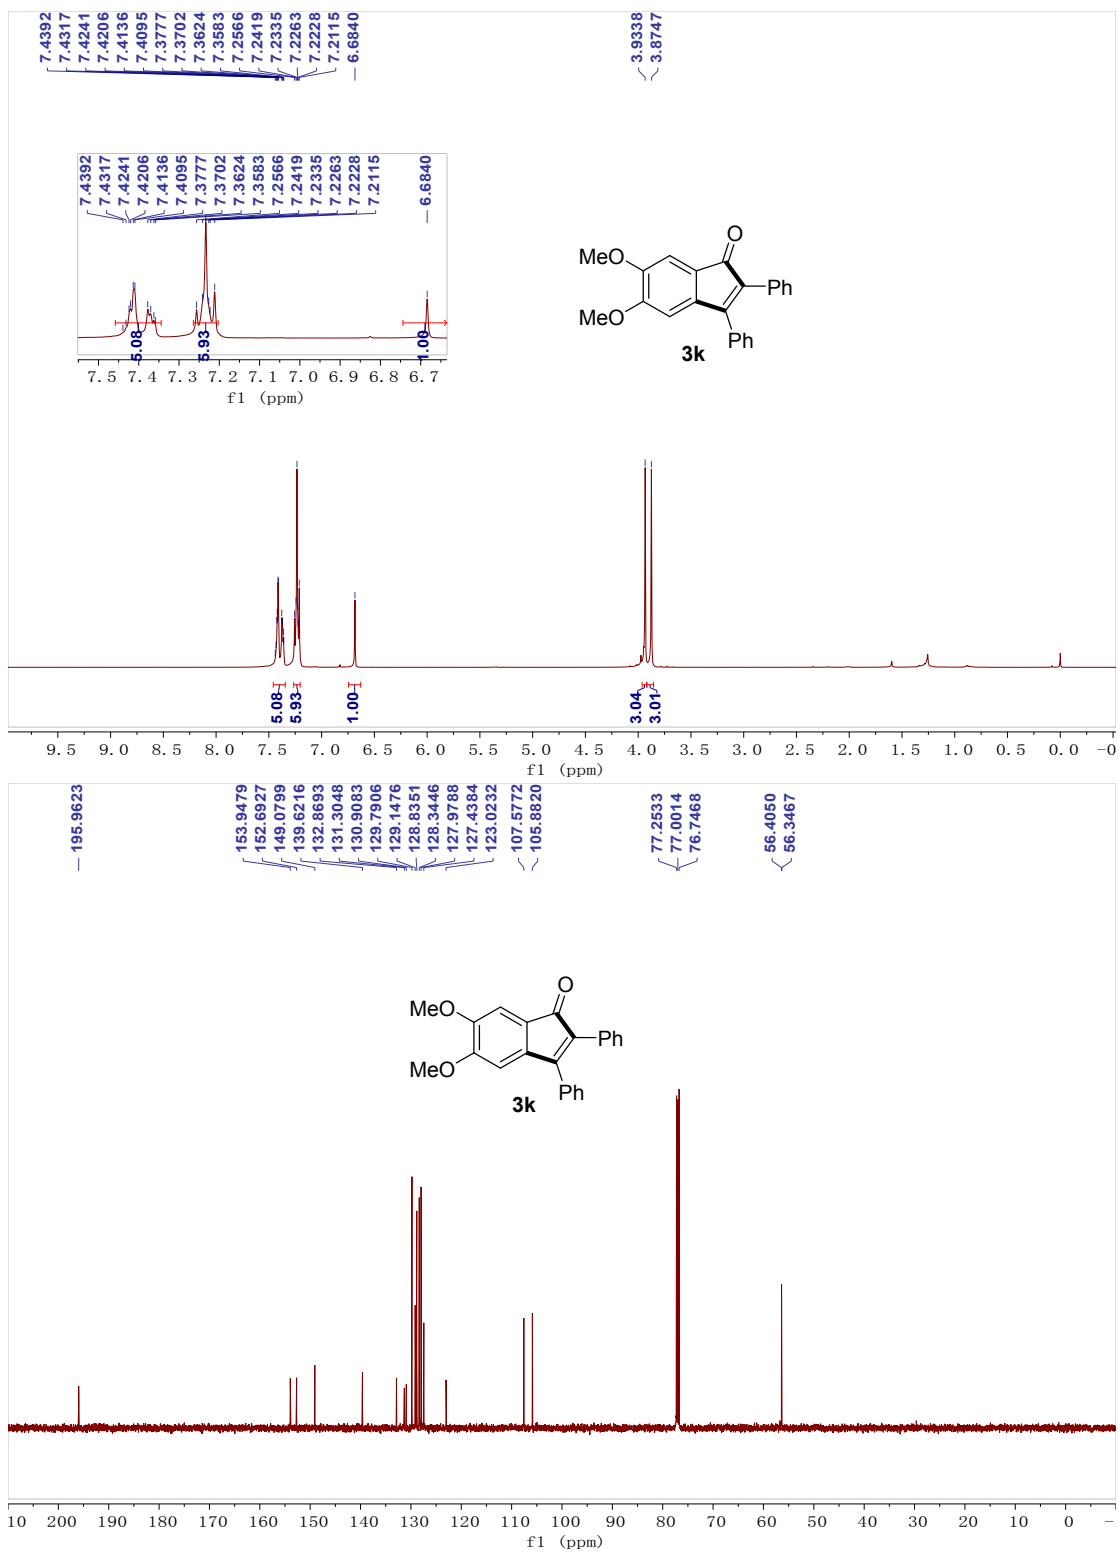

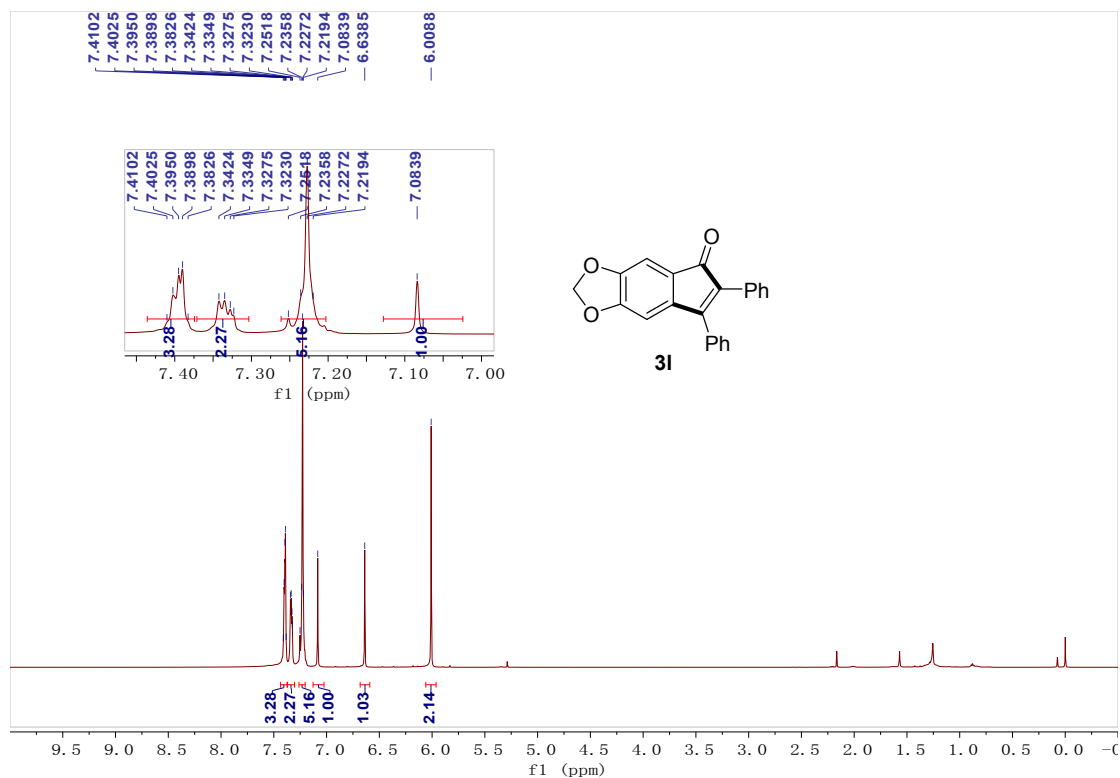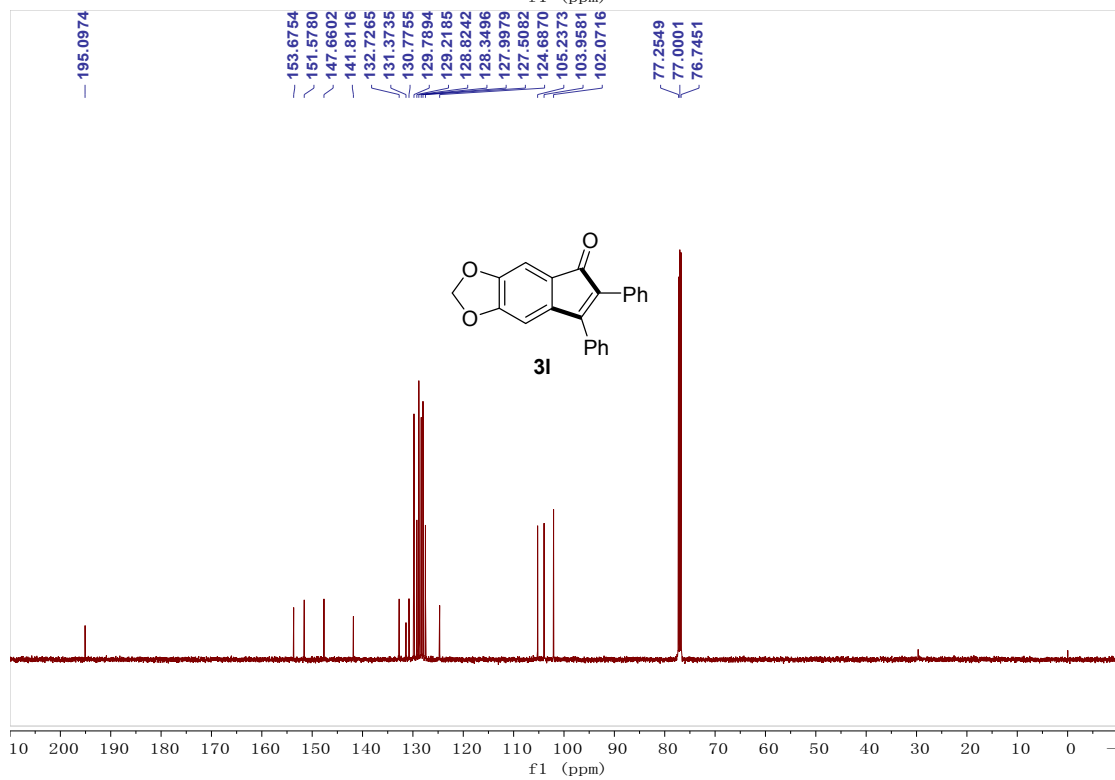



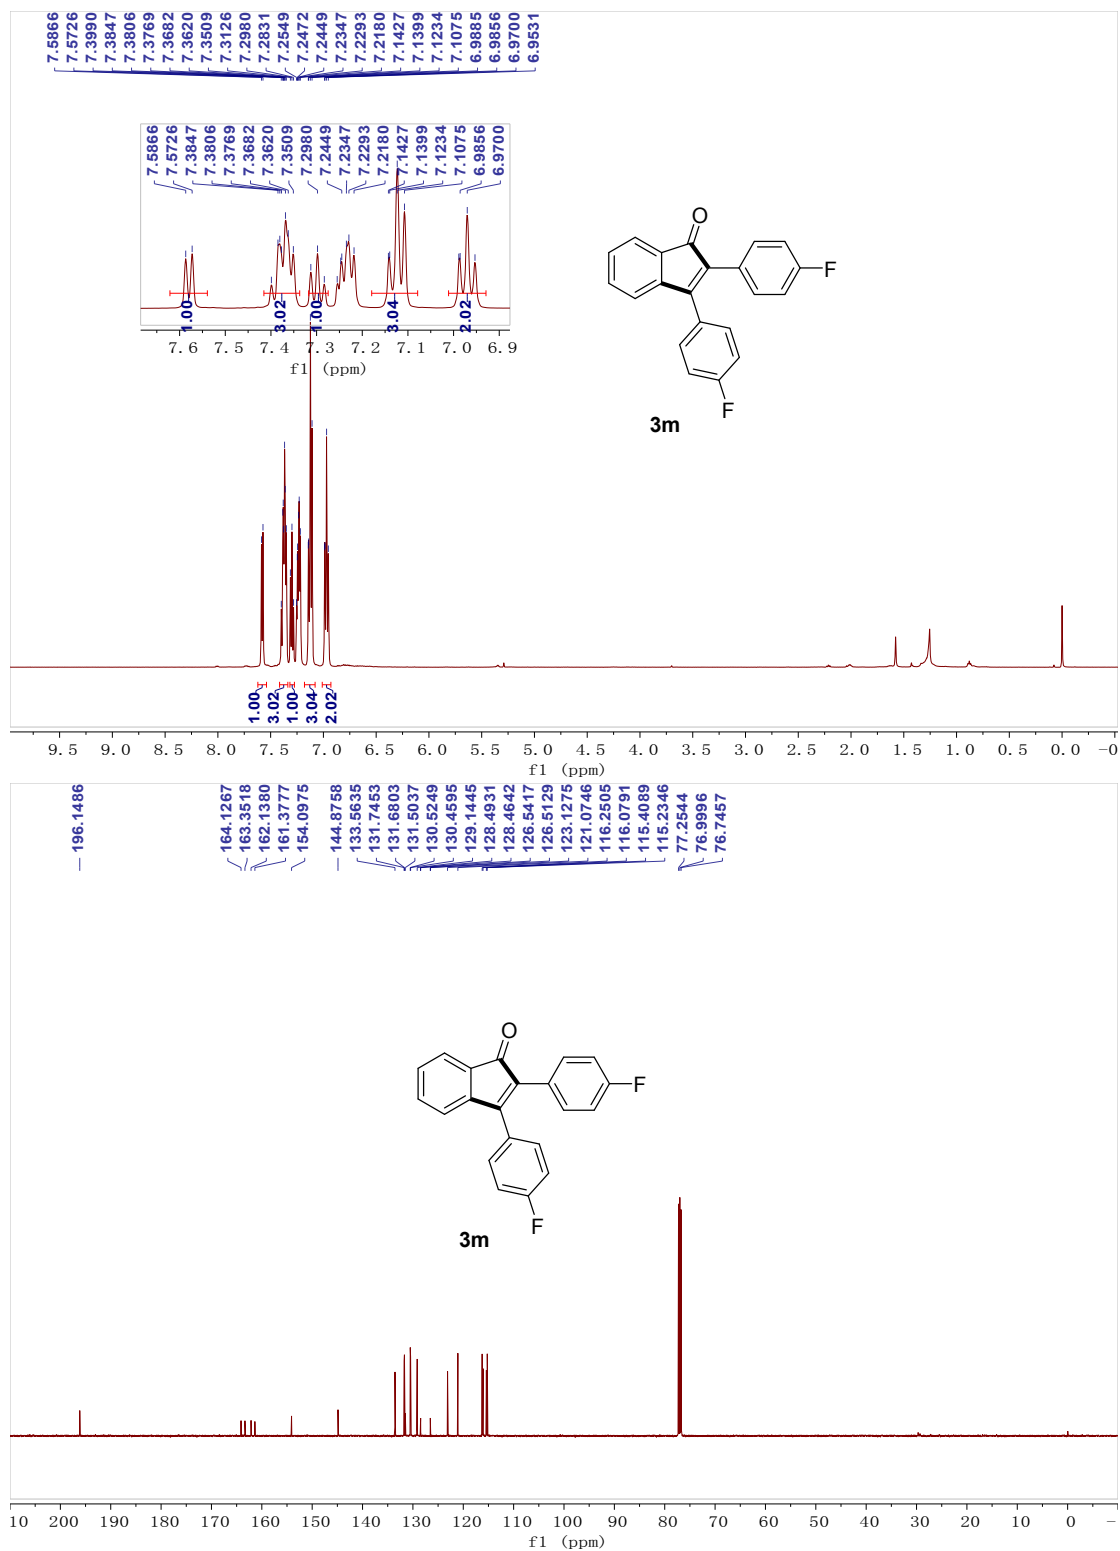

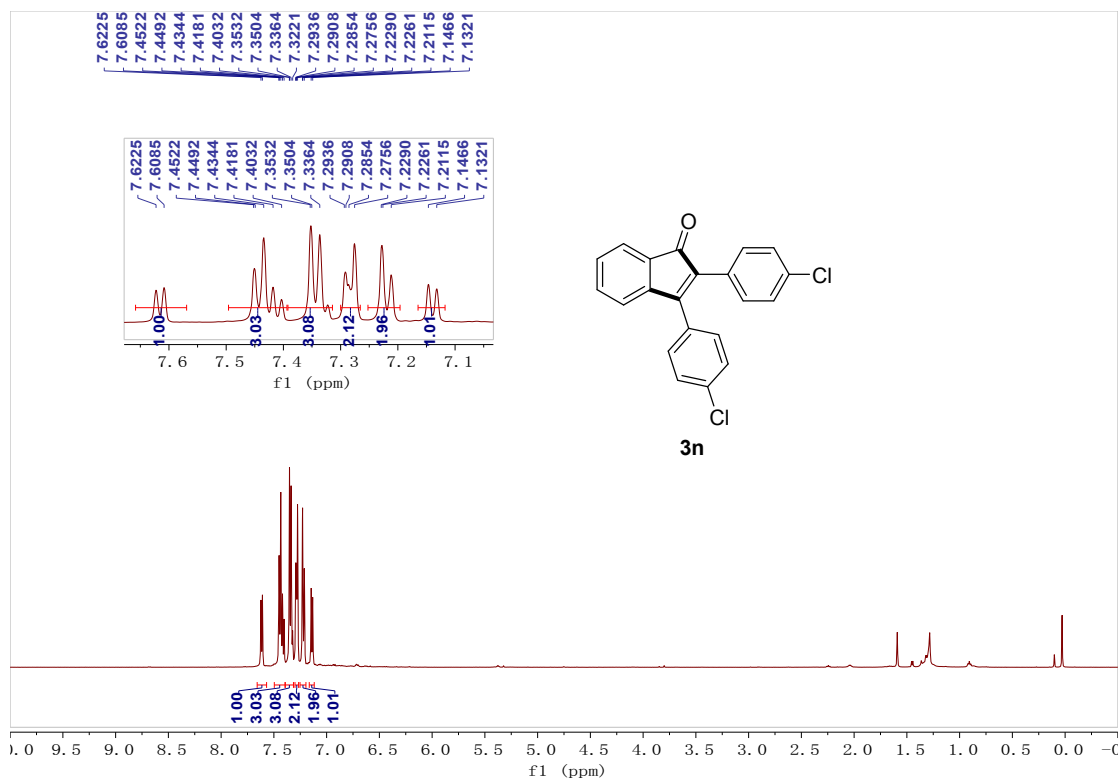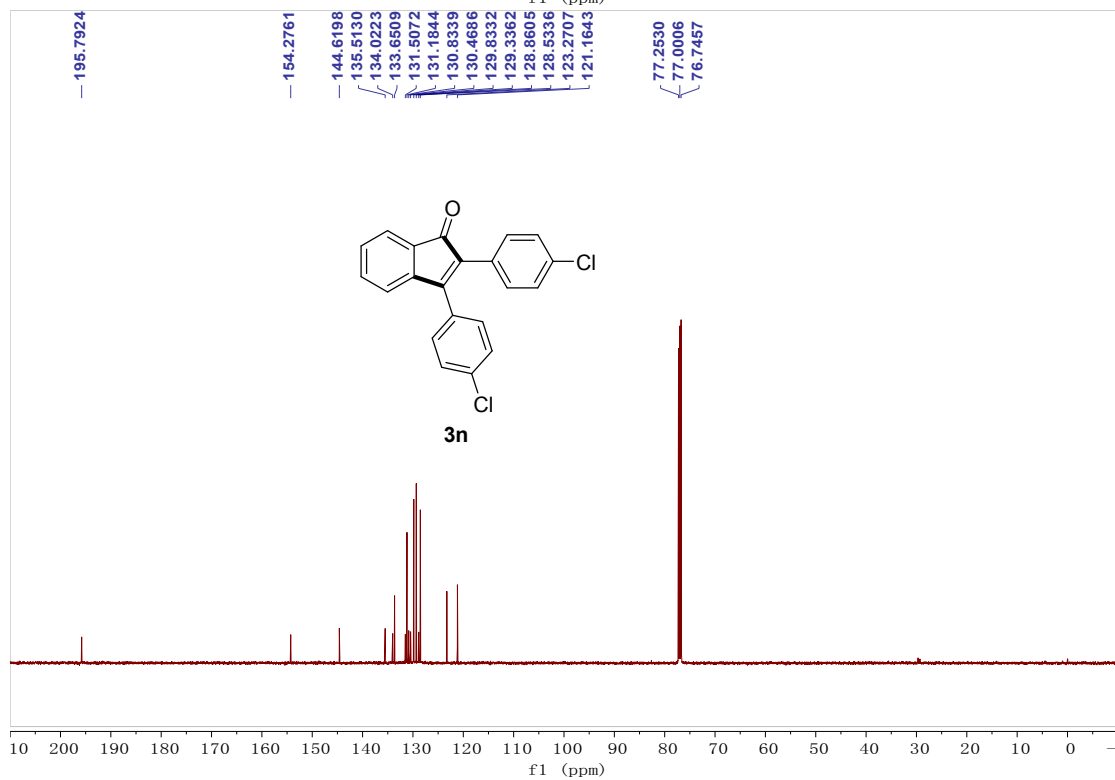

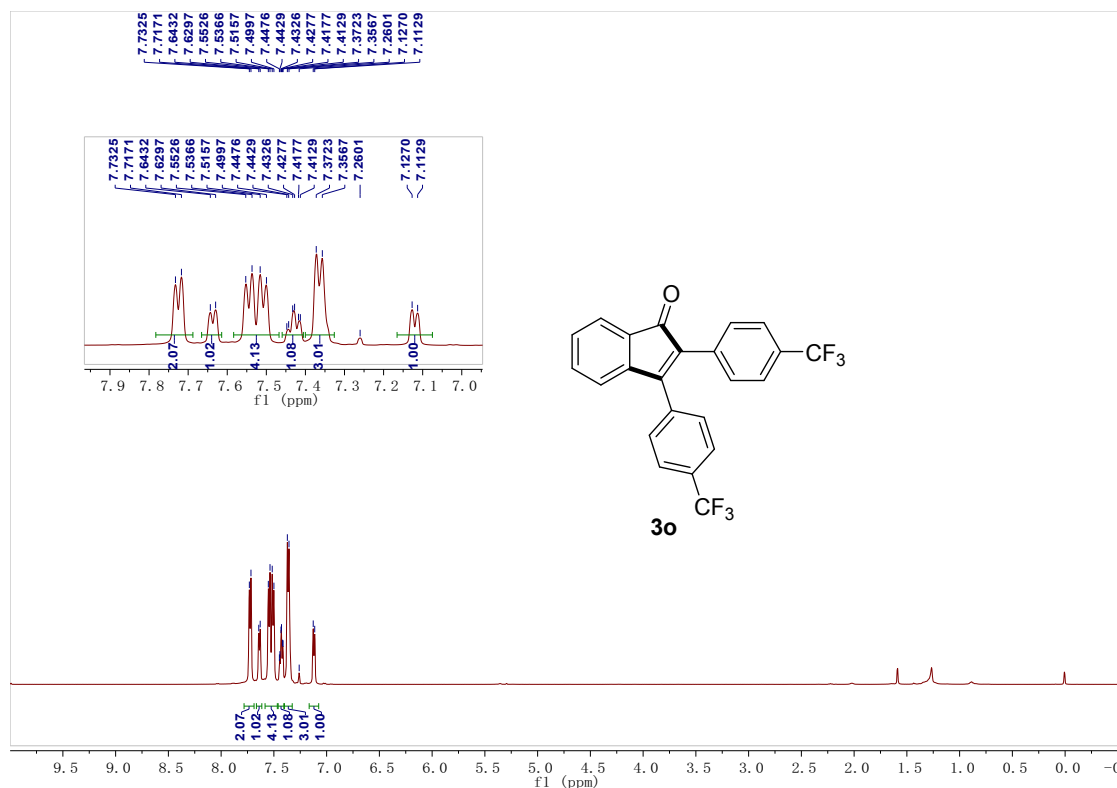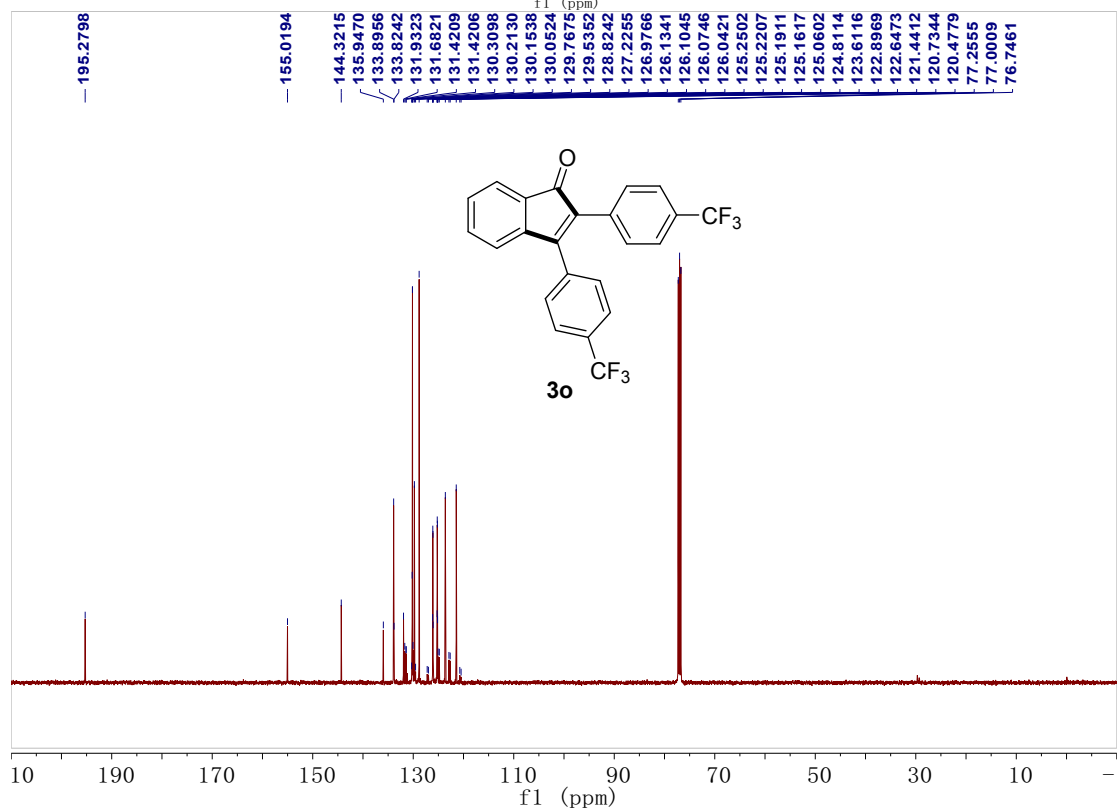

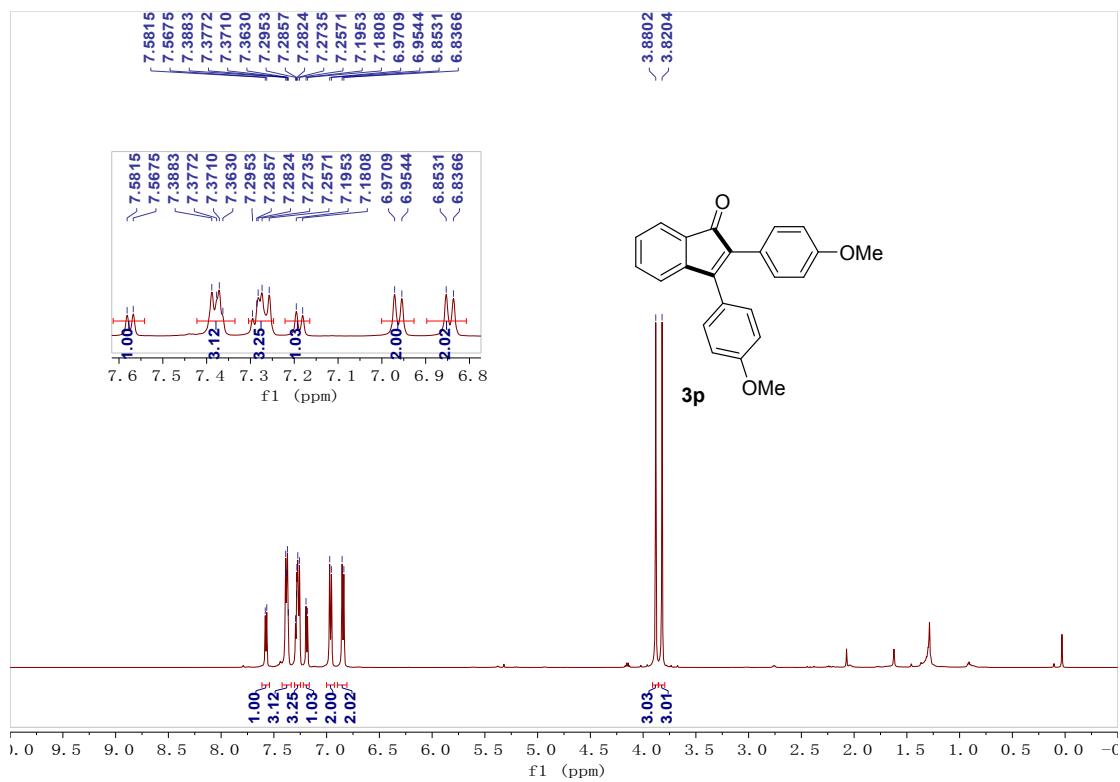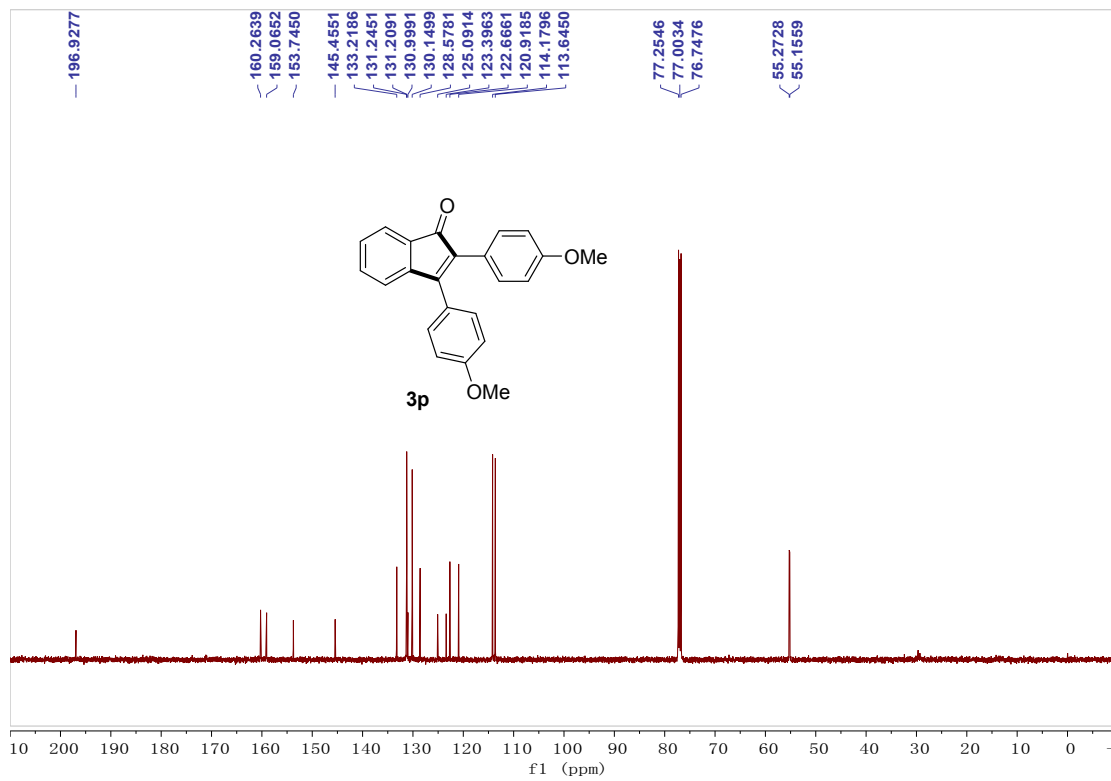

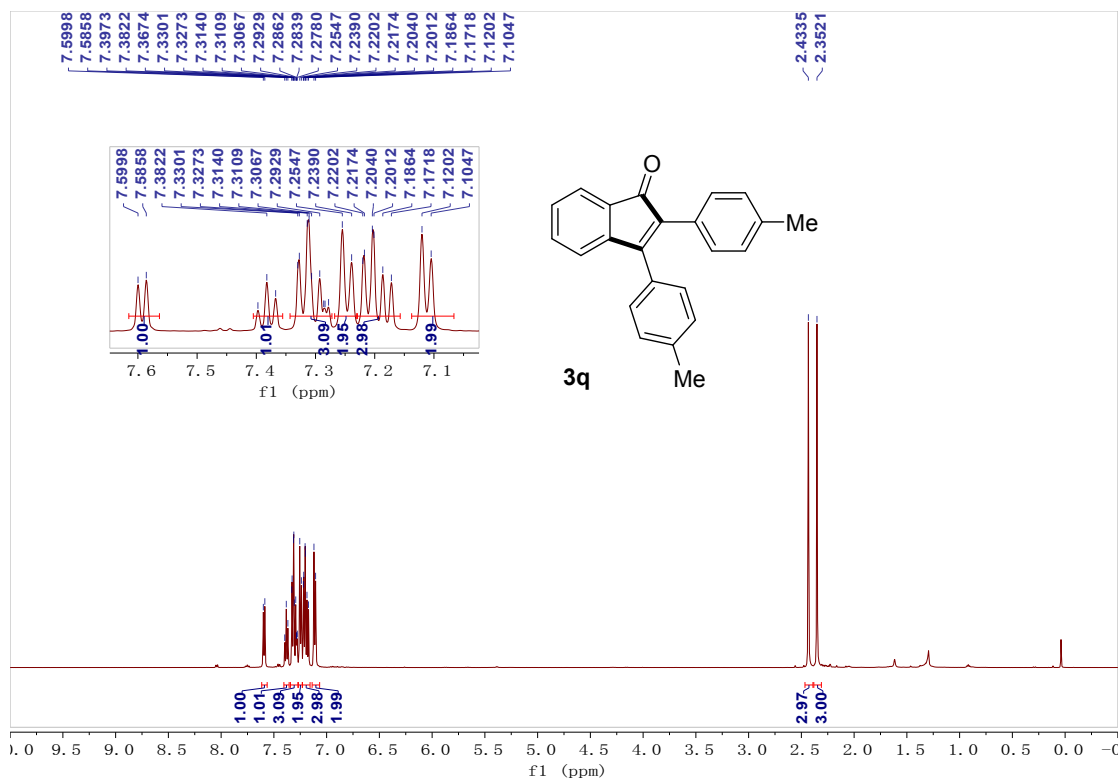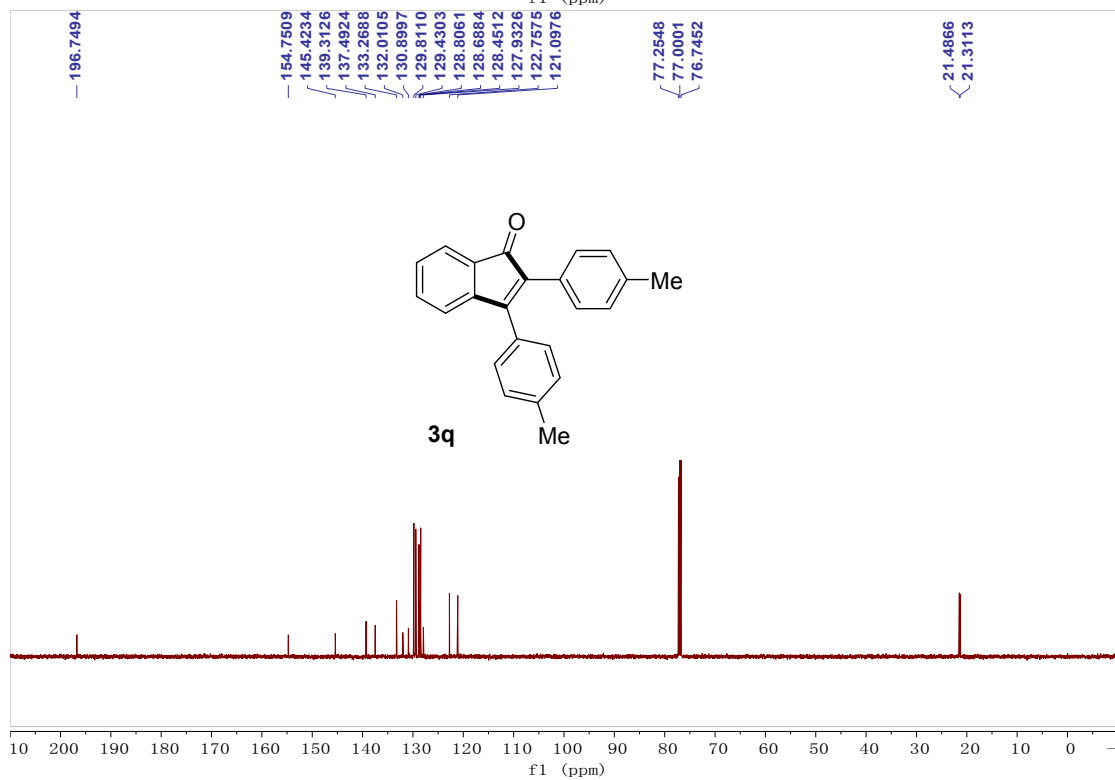

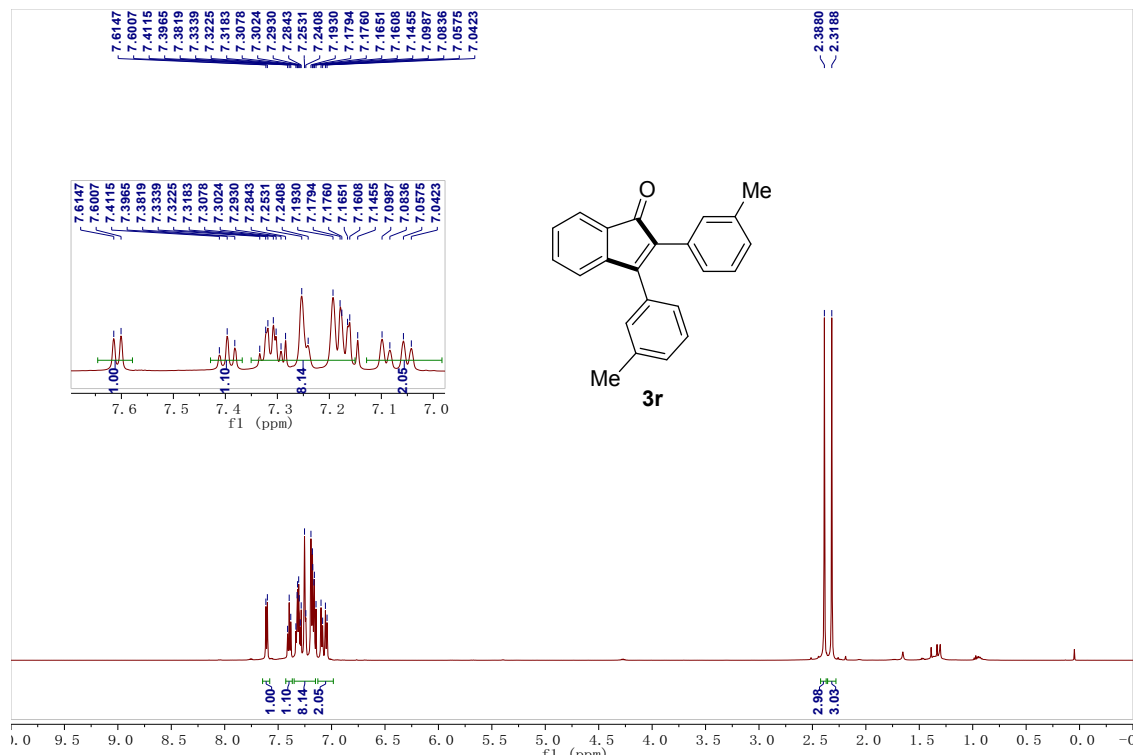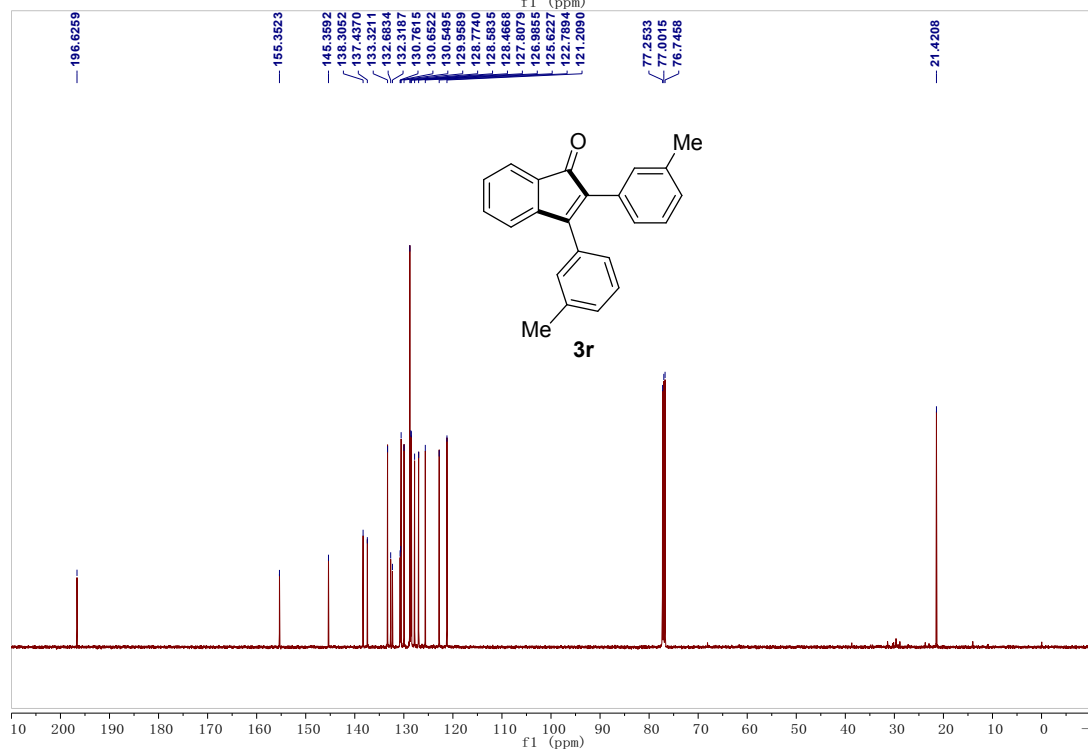

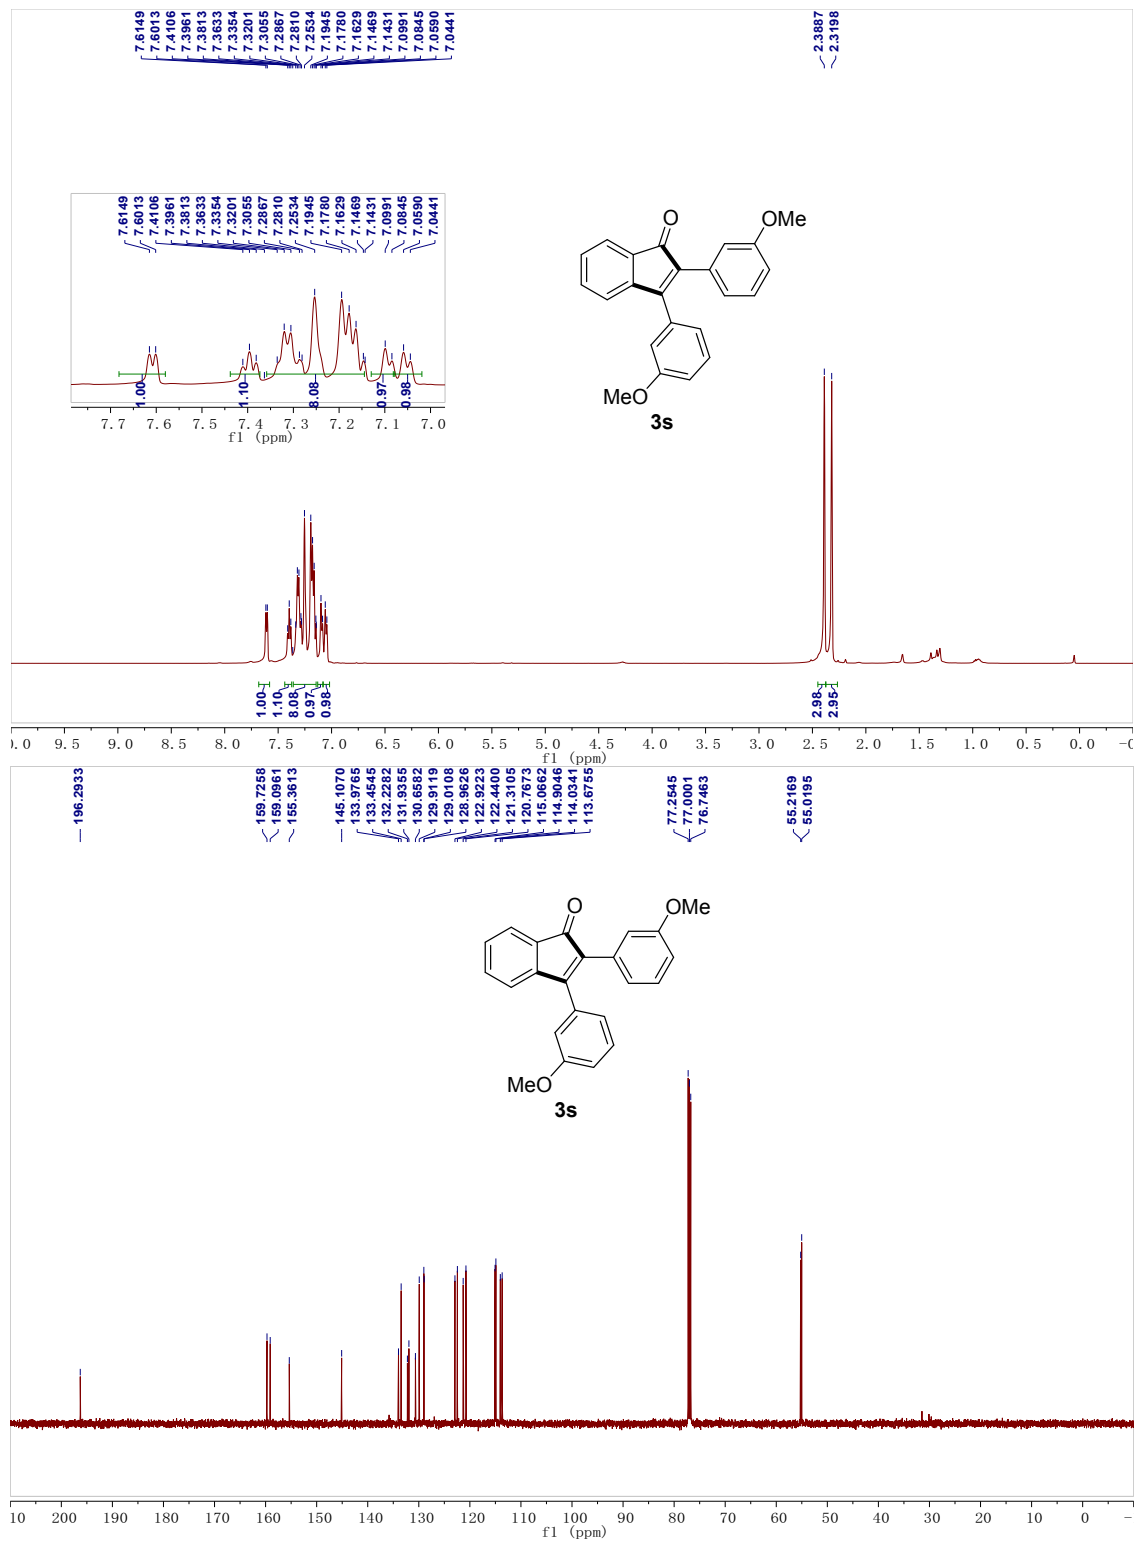

7.6132  
7.5993  
7.3874  
7.3725  
7.3579  
7.3226  
7.3080  
7.2931  
7.2841  
7.2690  
7.2309  
7.2159  
7.2004  
7.1846  
7.1735  
7.0845  
7.0710  
7.0573  
6.9675  
6.9522  
6.9109  
6.8966

2.1698  
2.1145

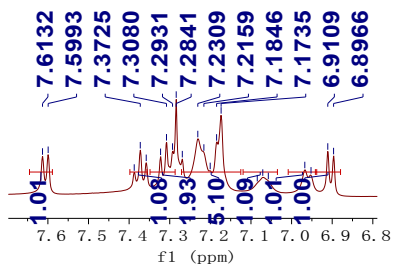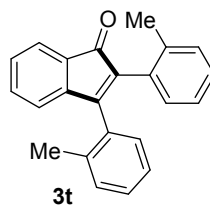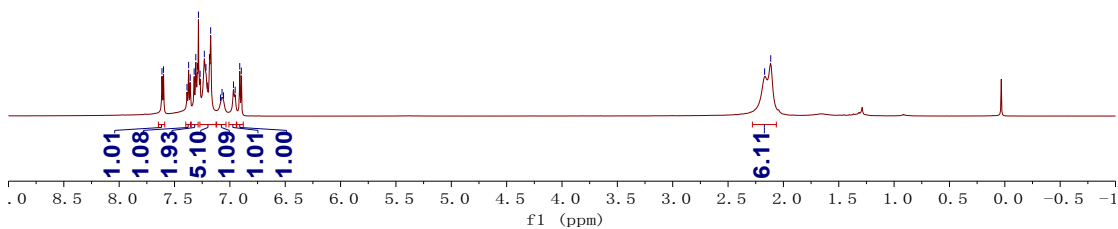

196.2565  
157.5945  
145.9095  
137.1021  
135.9393  
135.8369  
133.5223  
130.9999  
130.7370  
130.5606  
130.2793  
128.8937  
128.8690  
128.1525  
125.8165  
125.4031  
122.8924  
121.4967

20.6639  
20.1842

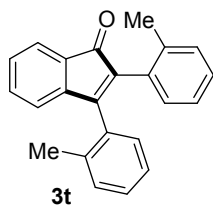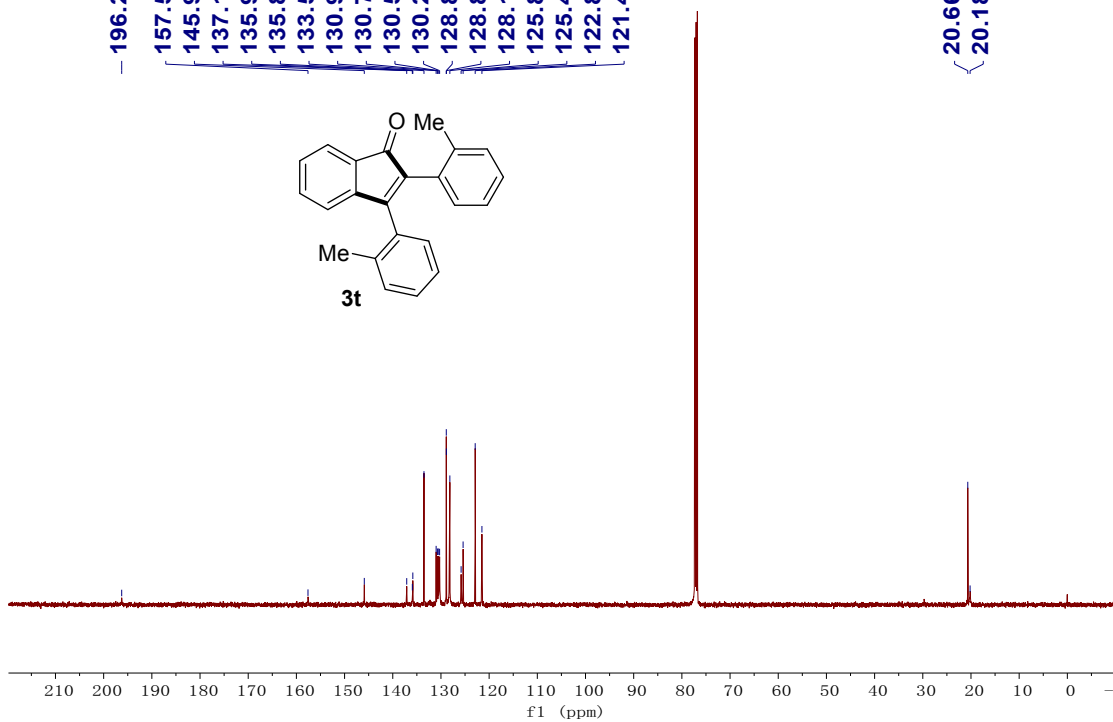



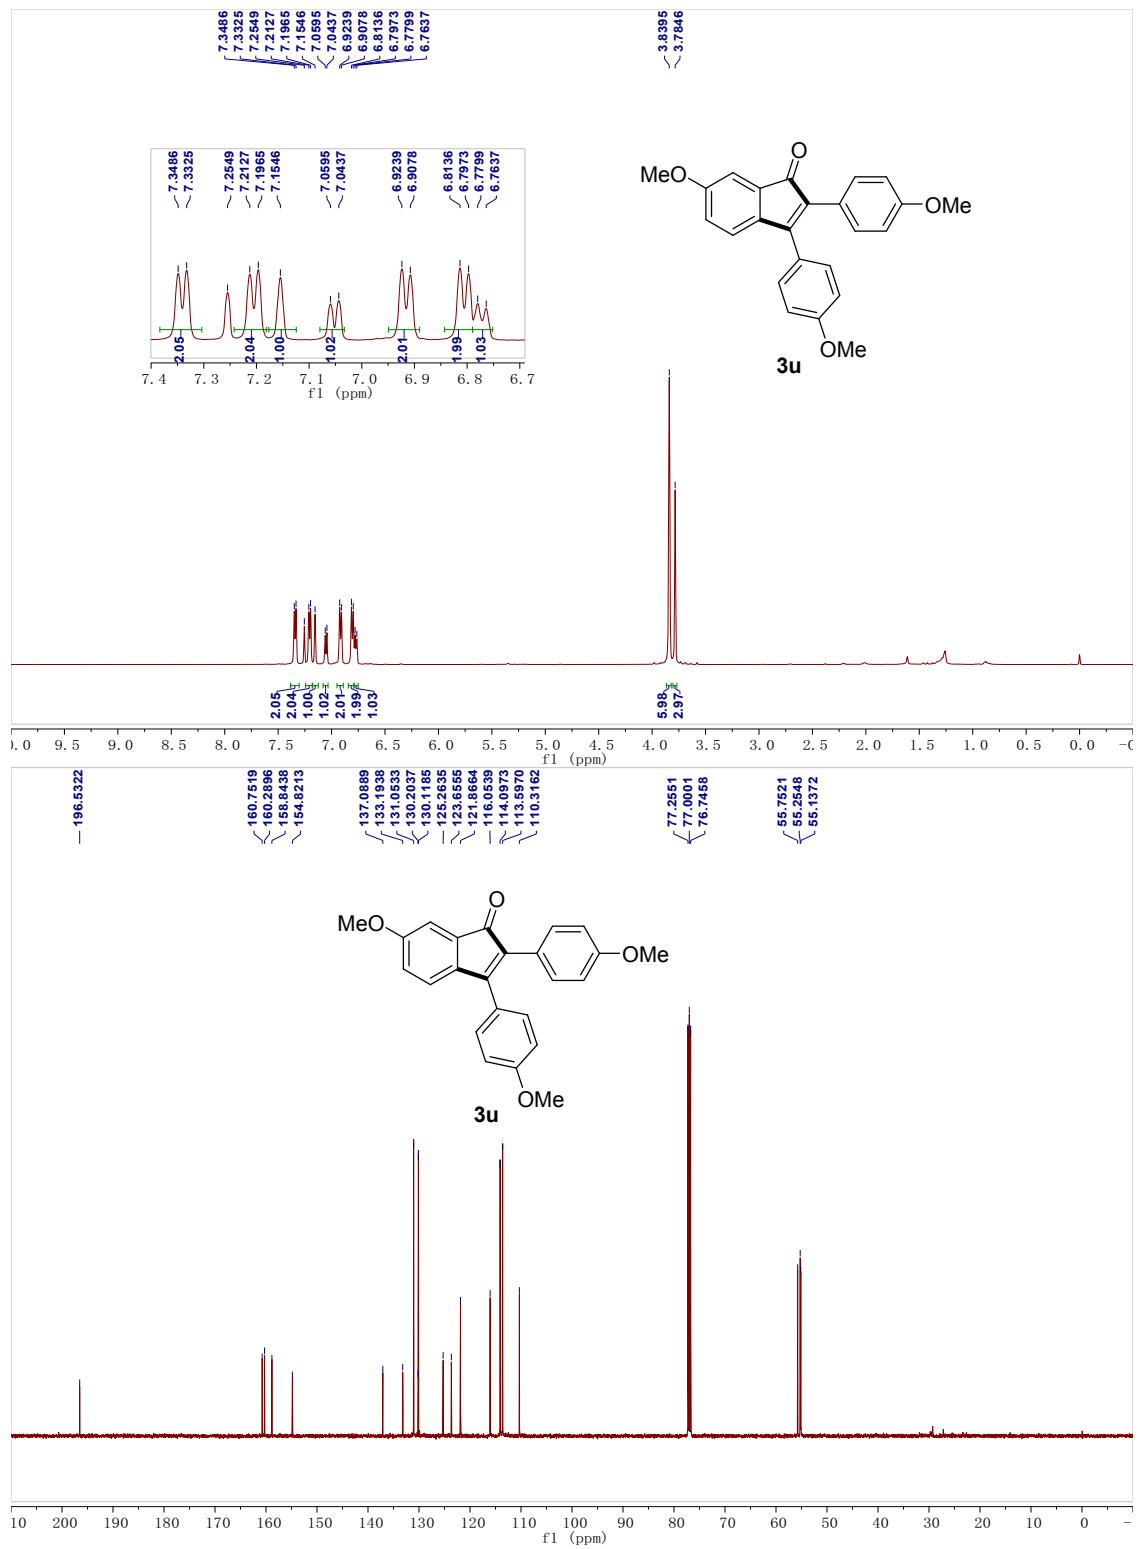

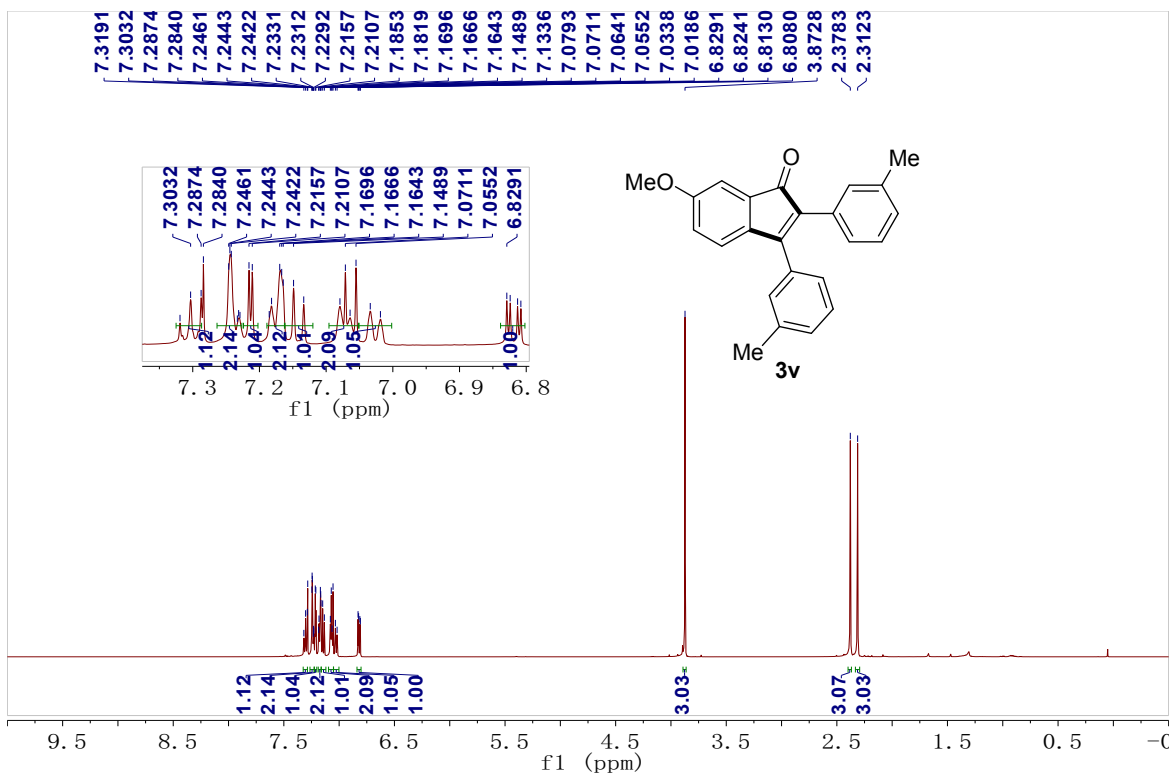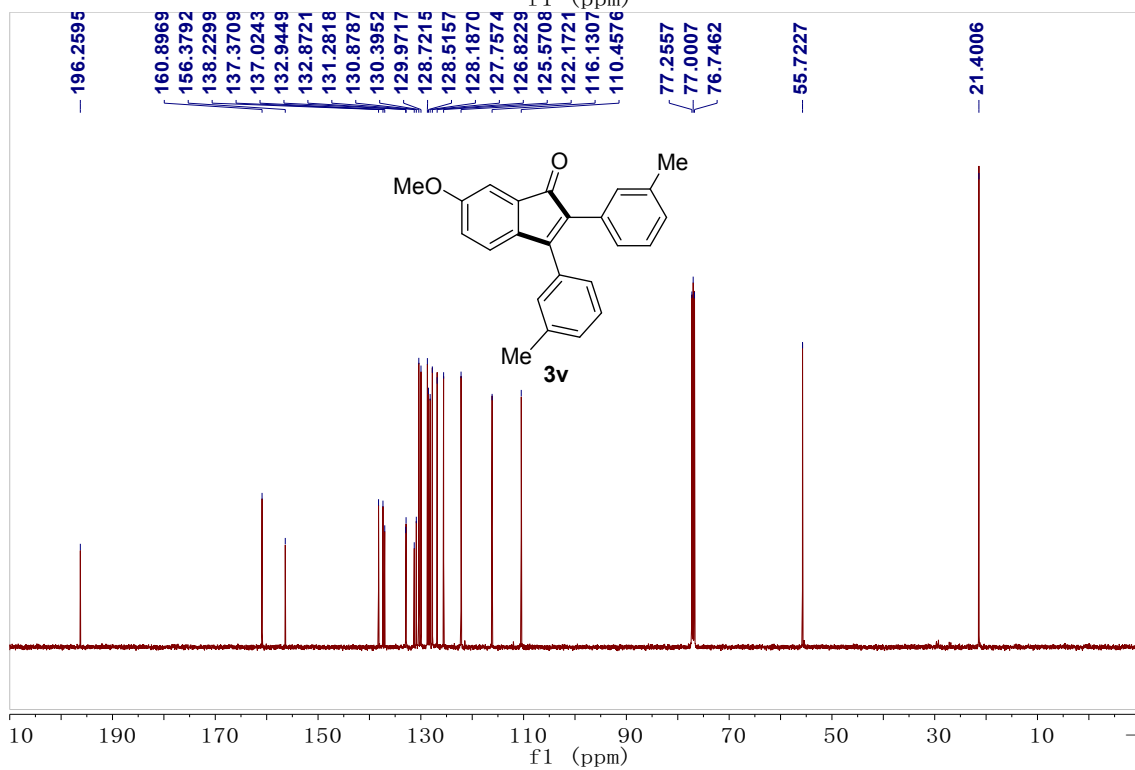

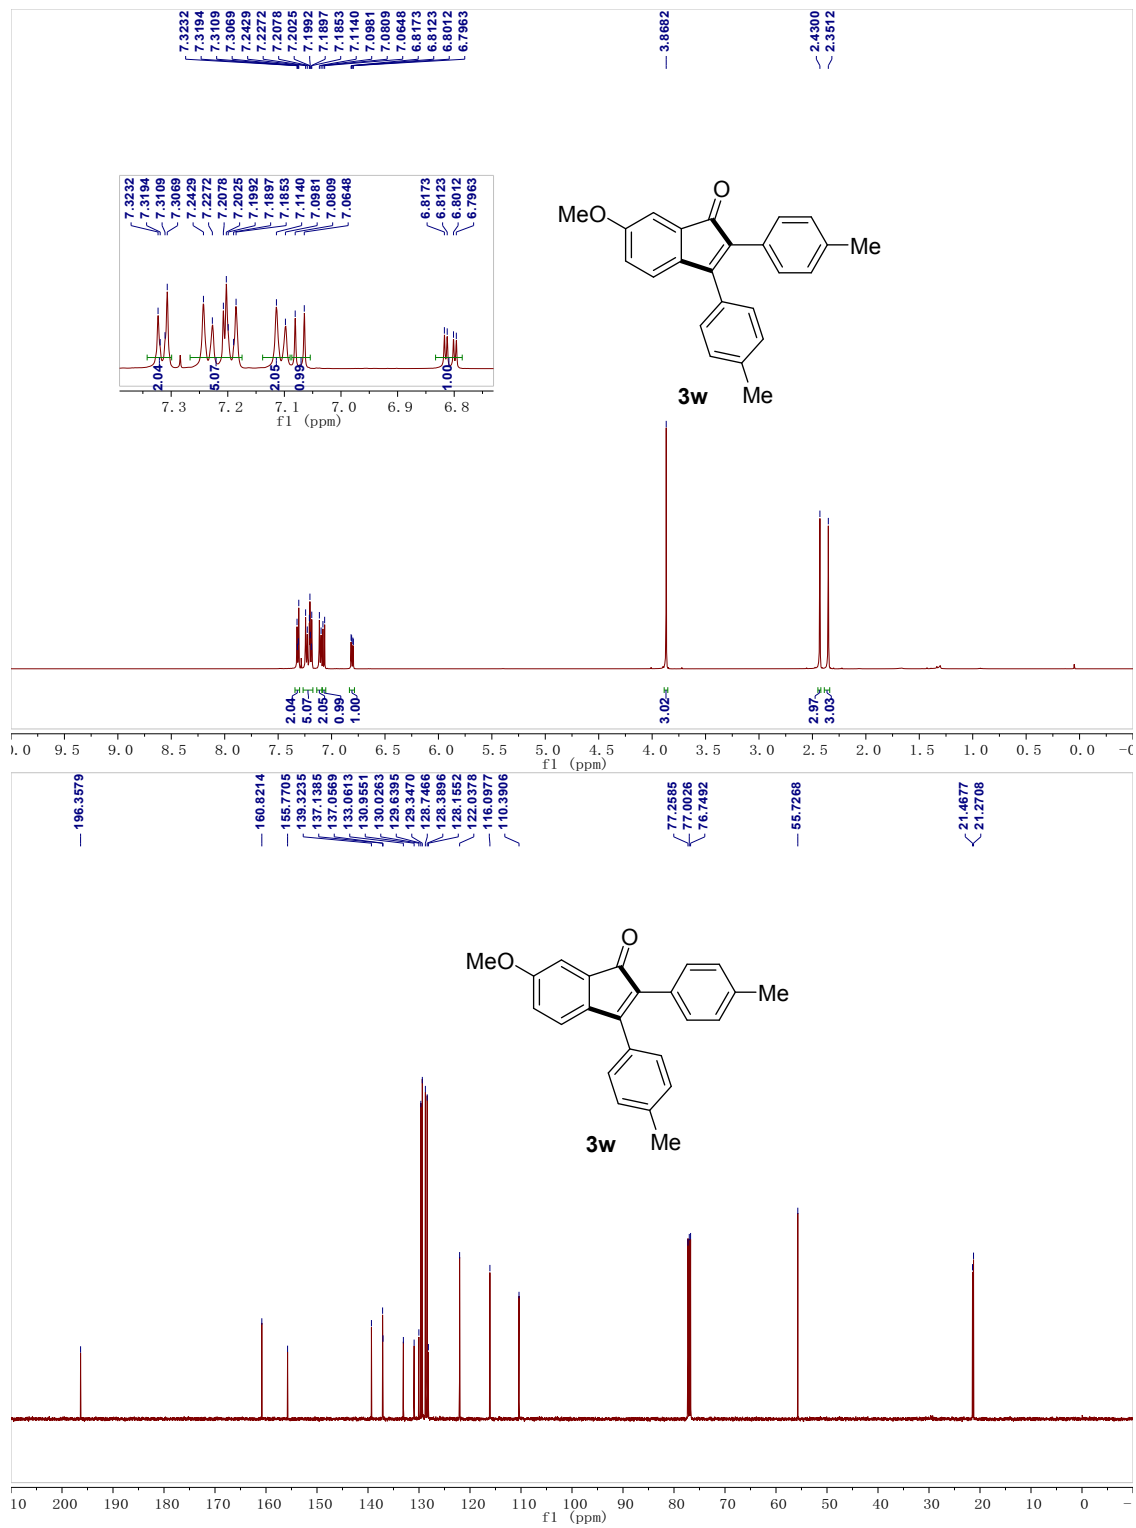

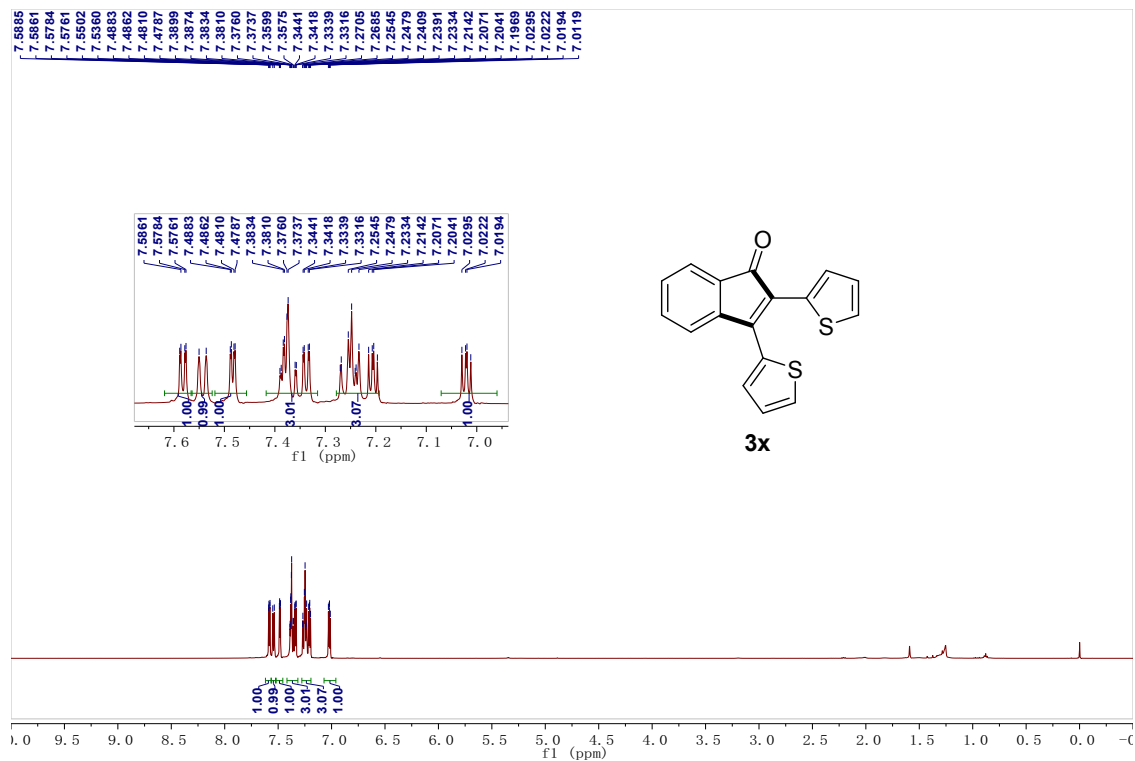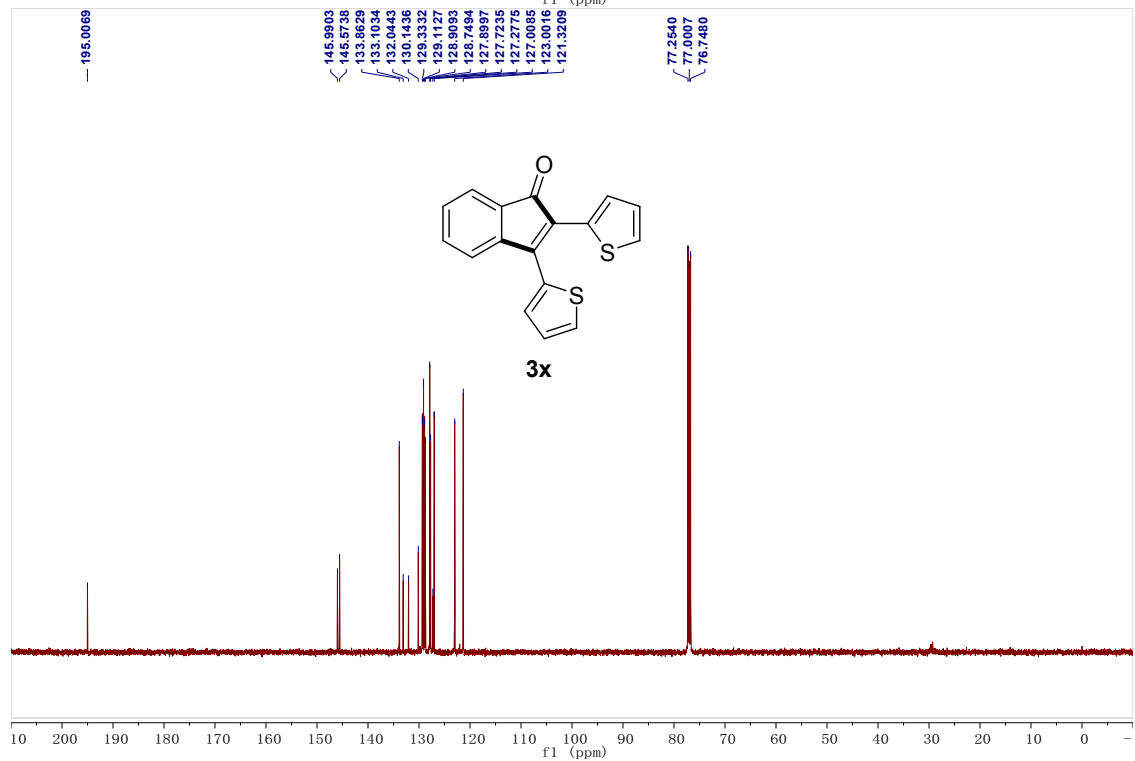

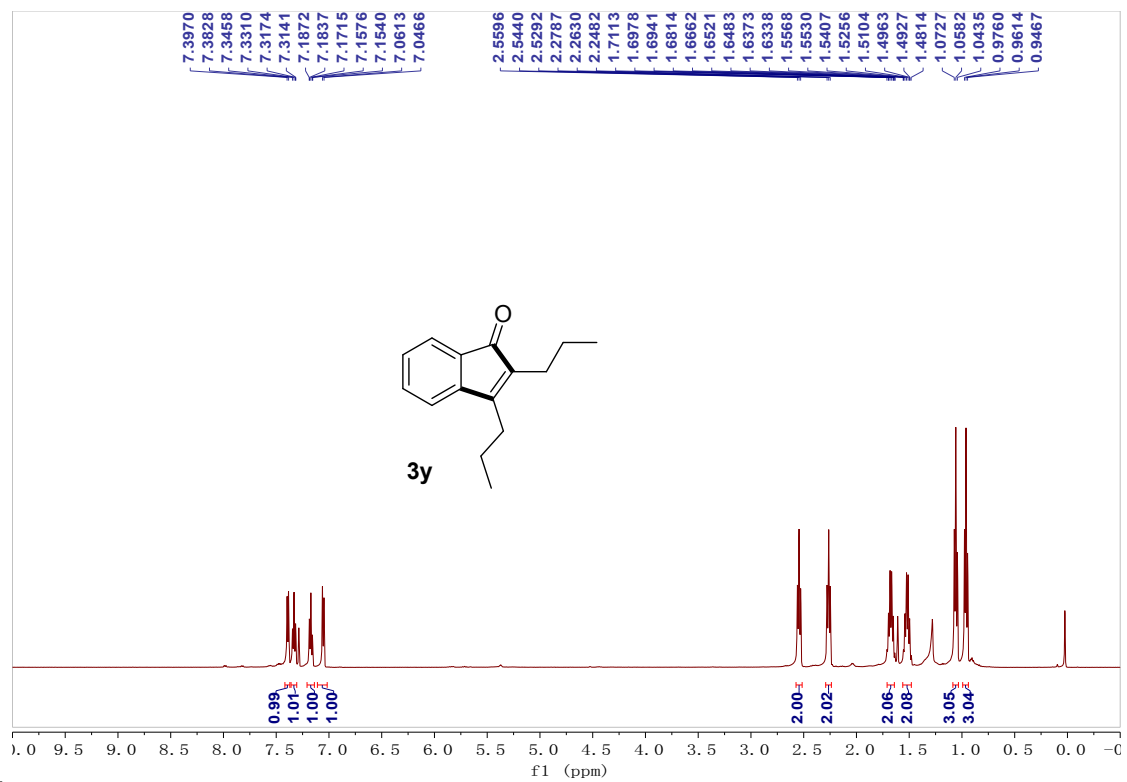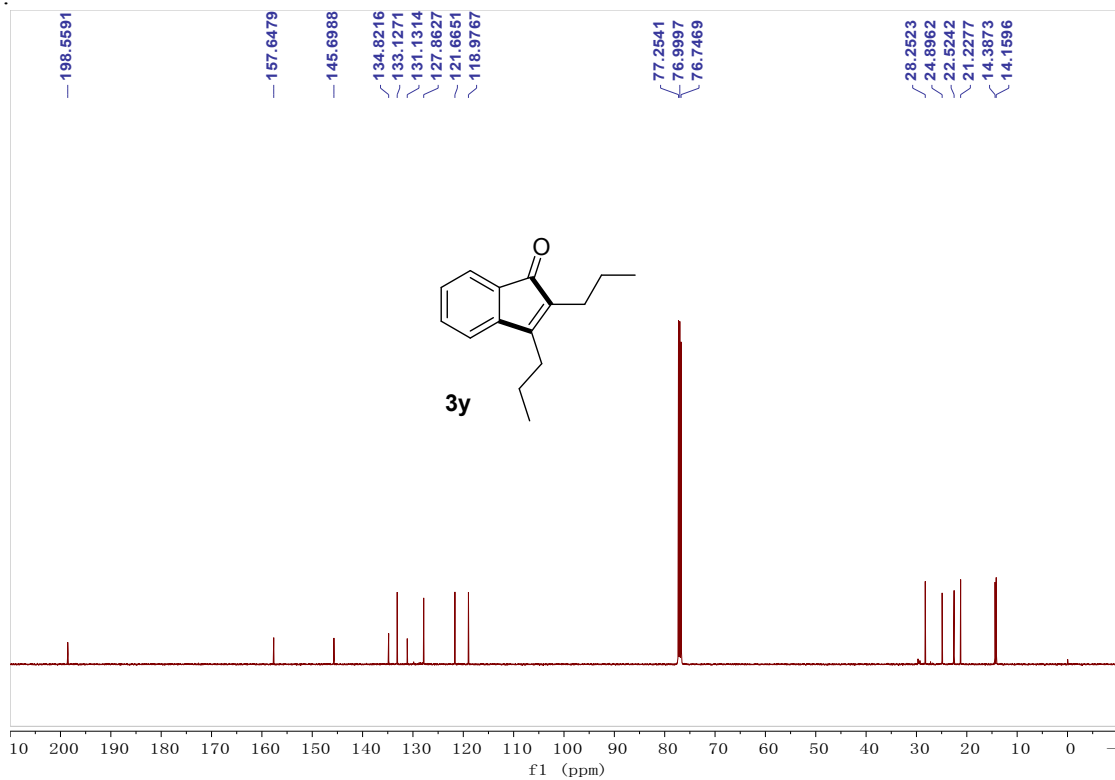

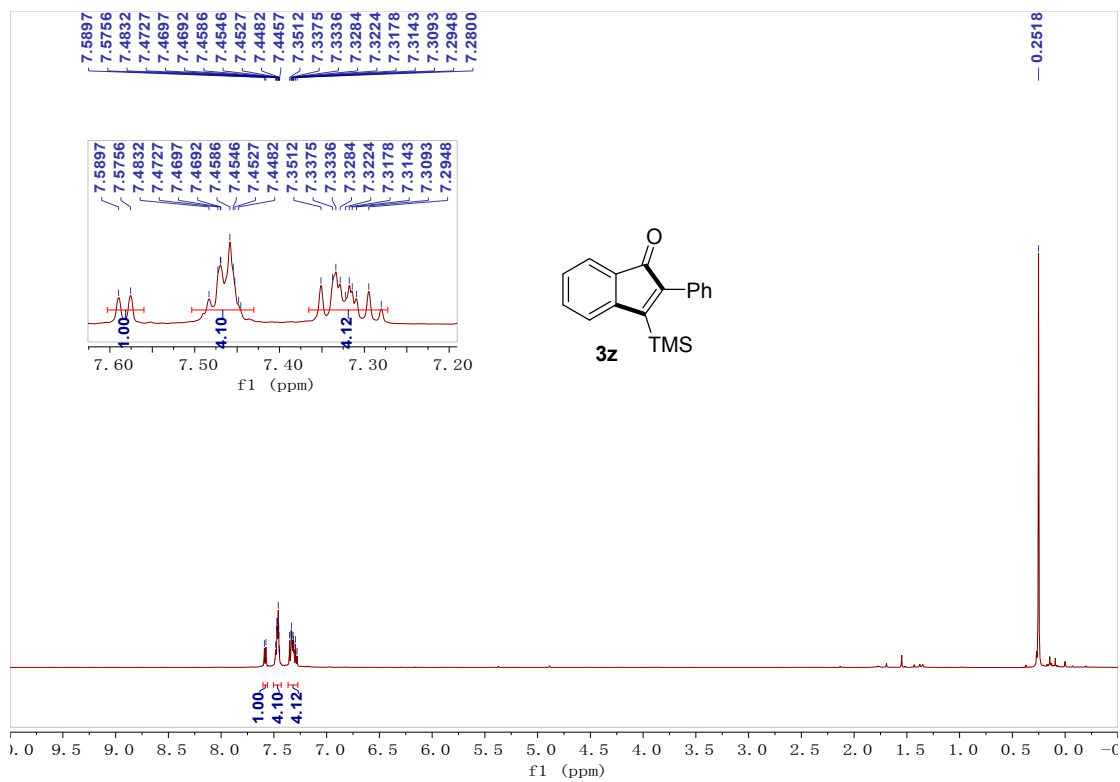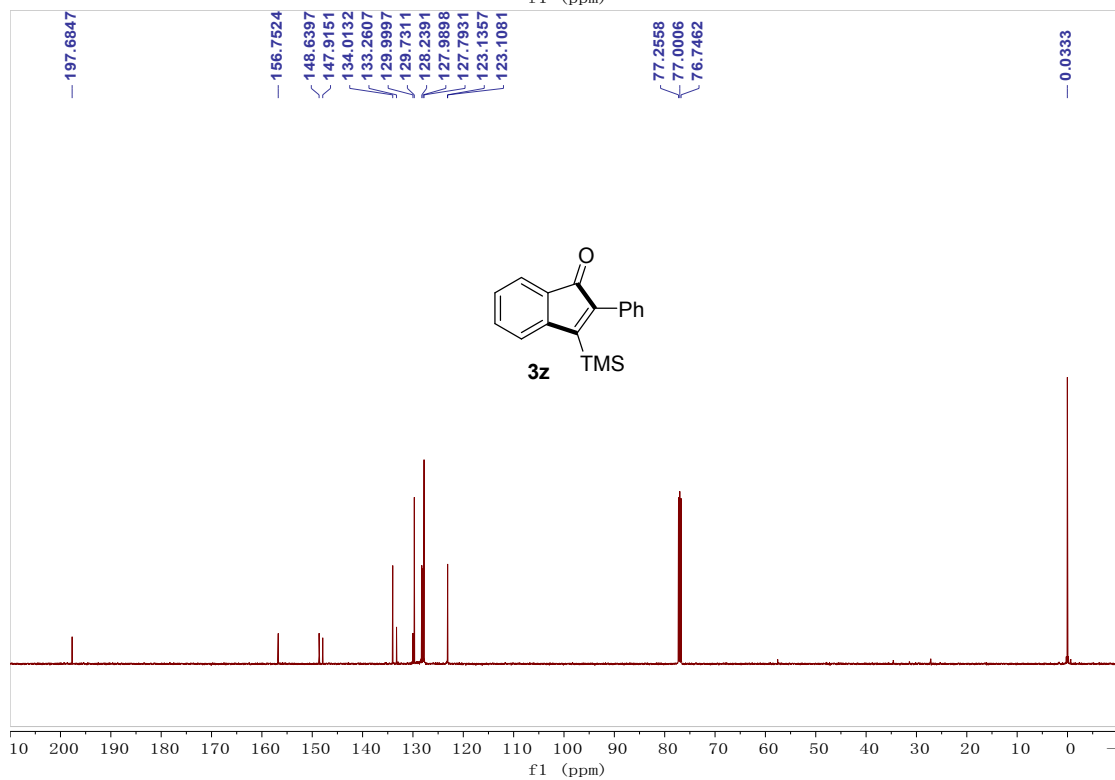

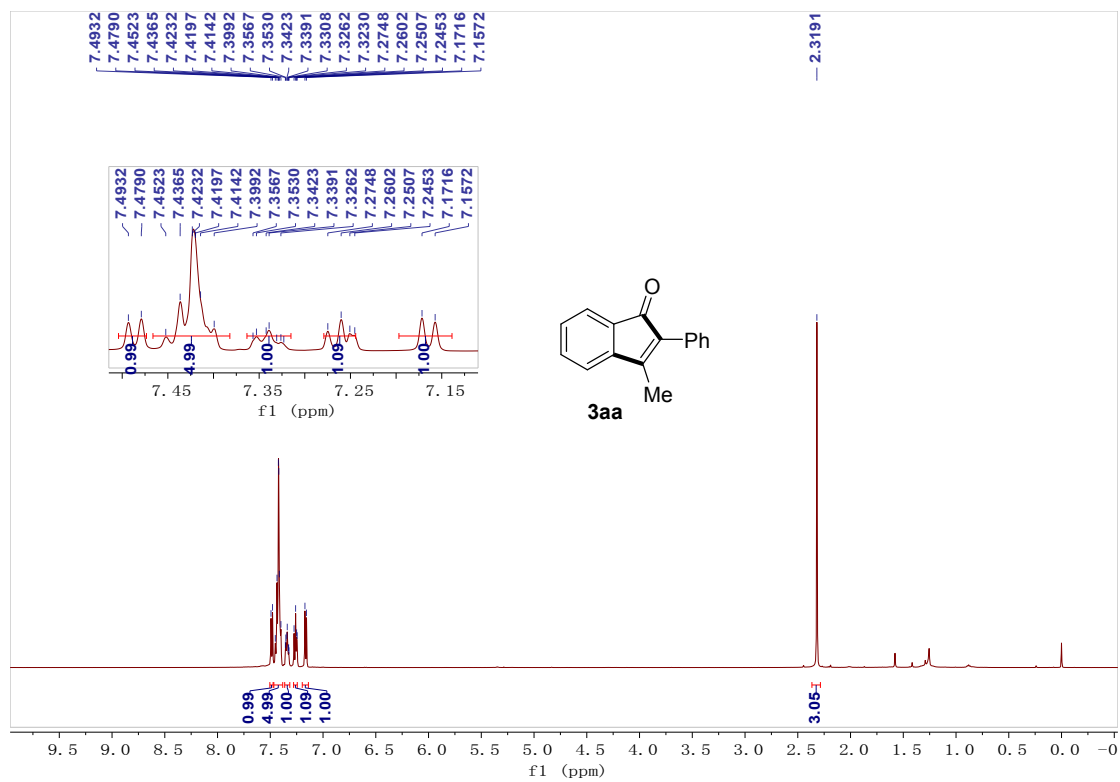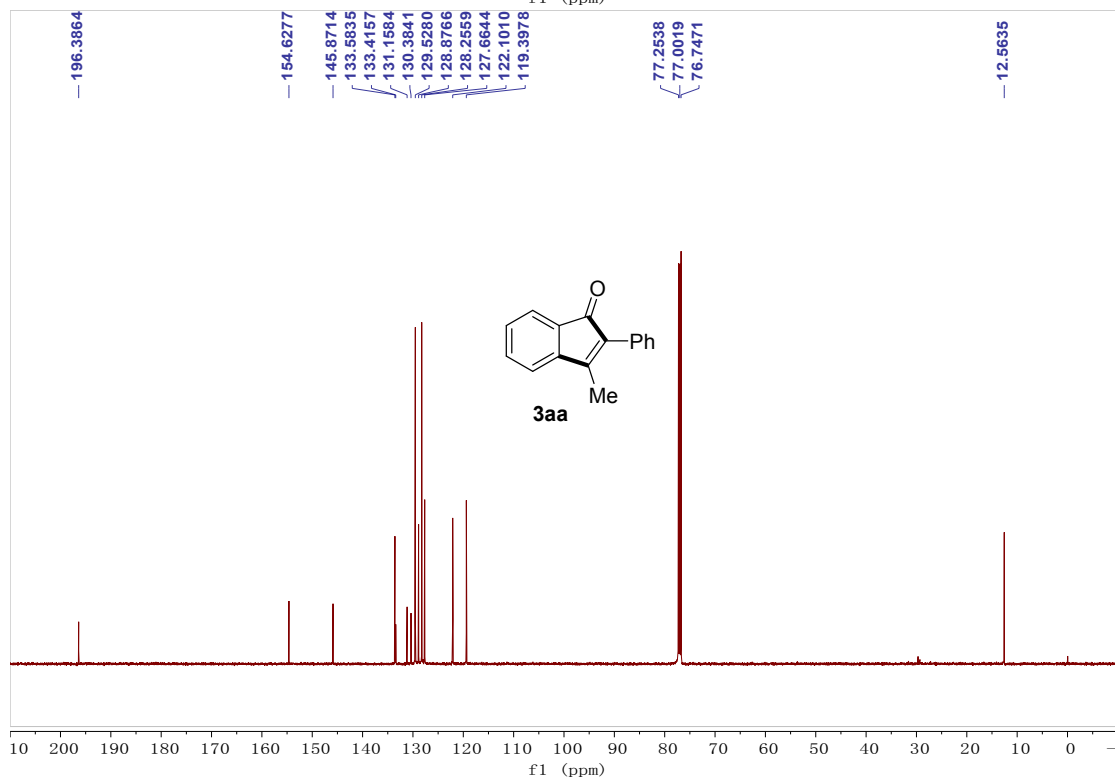

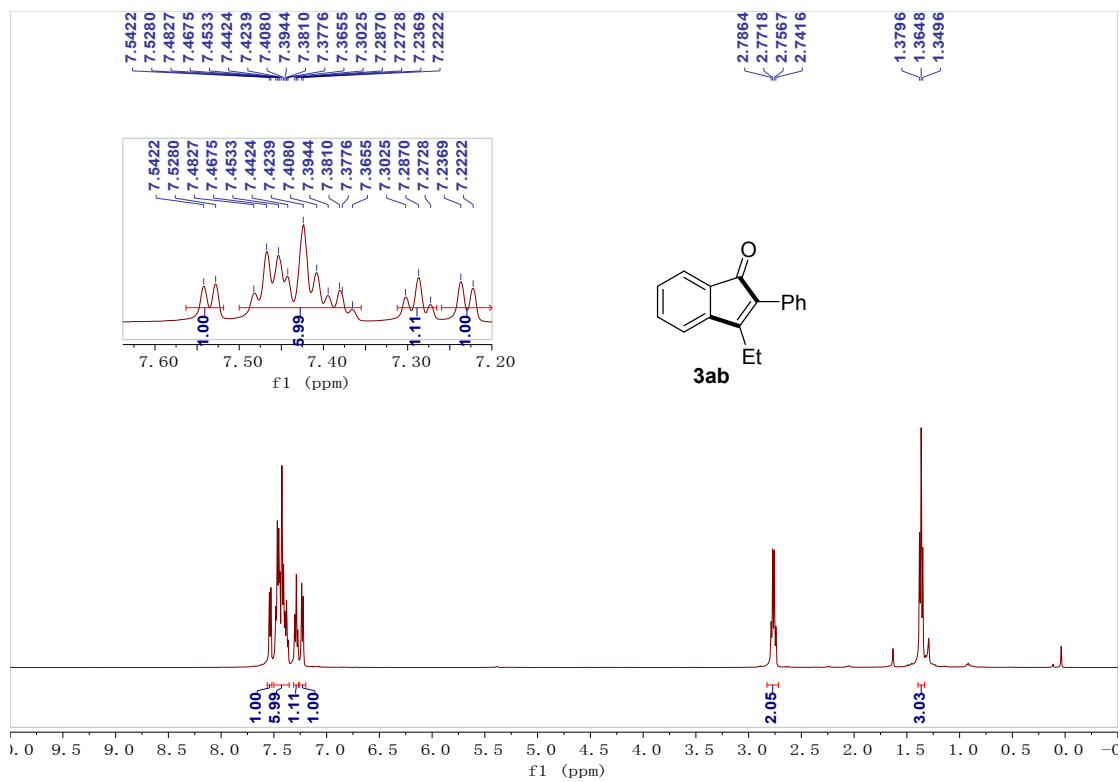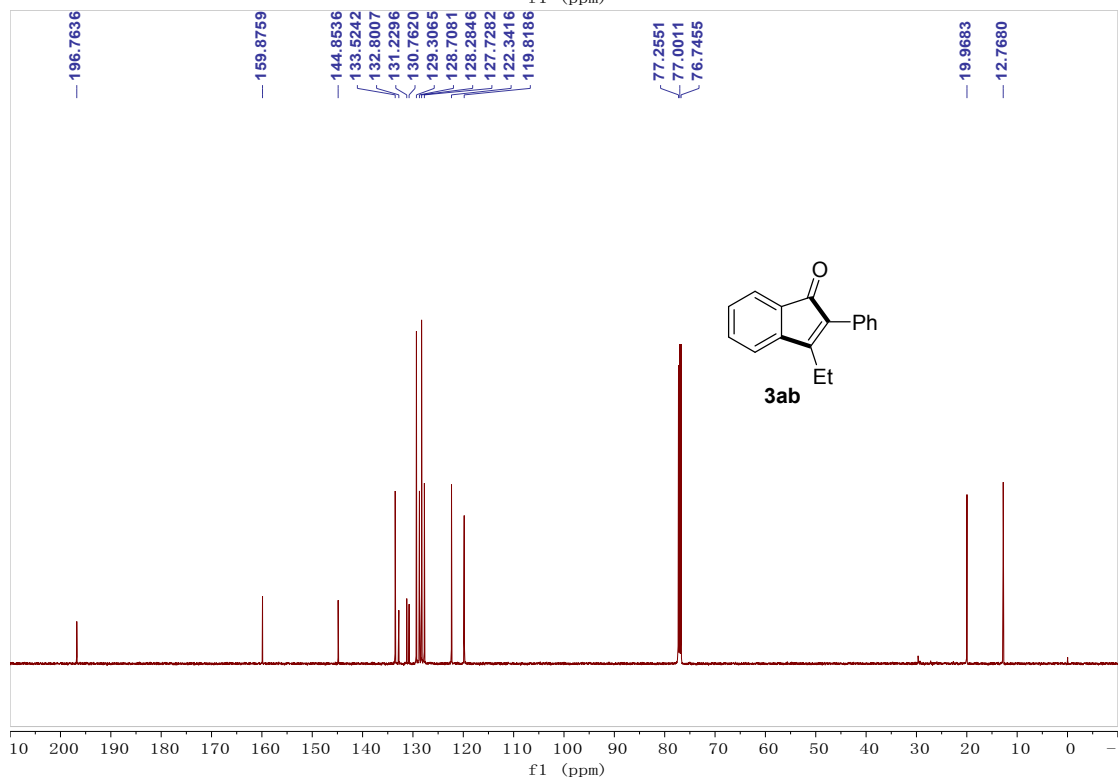



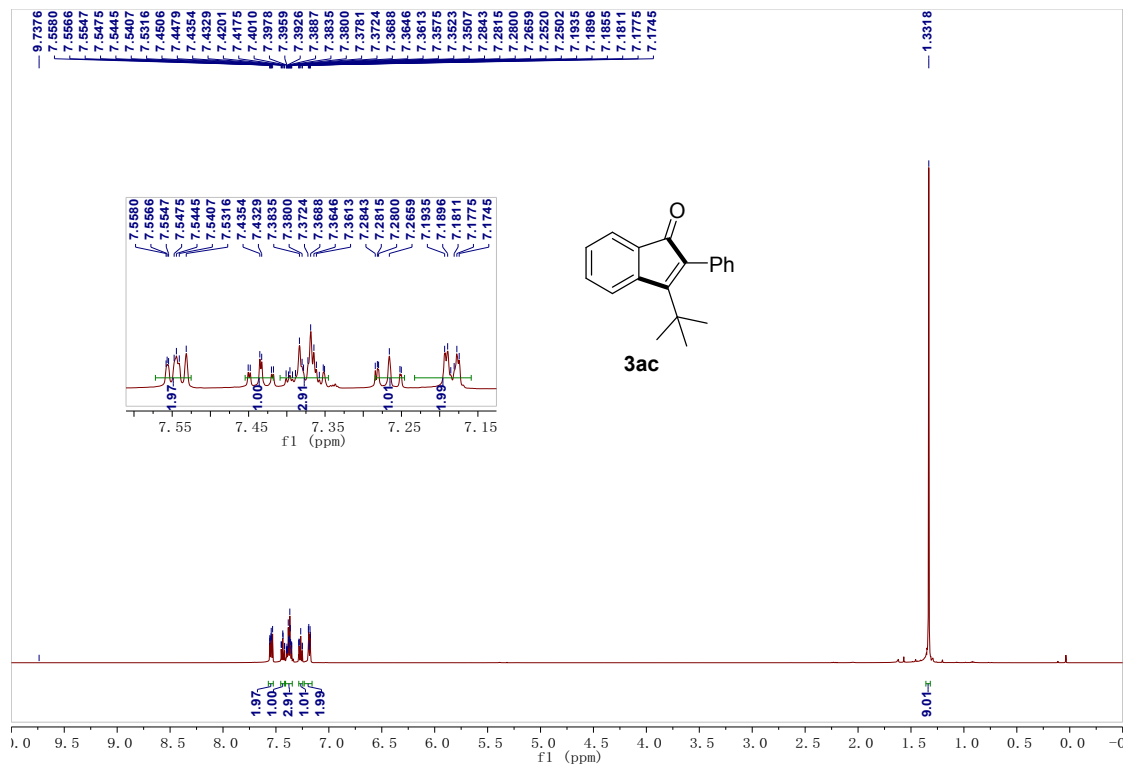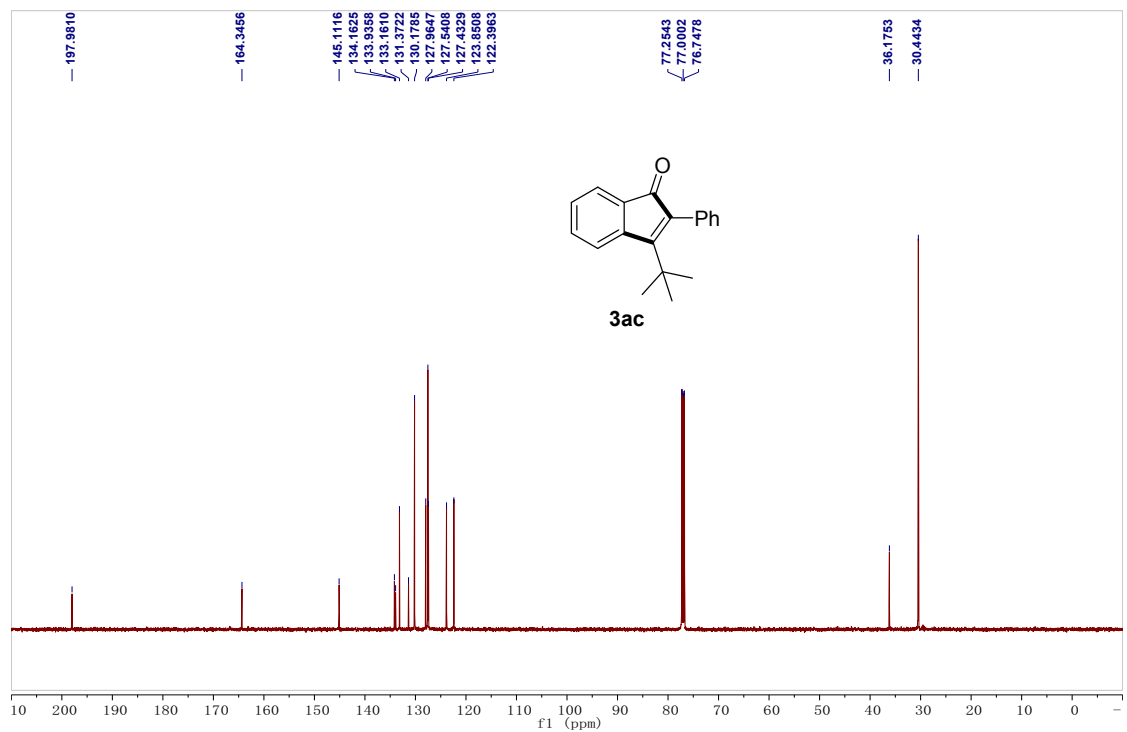

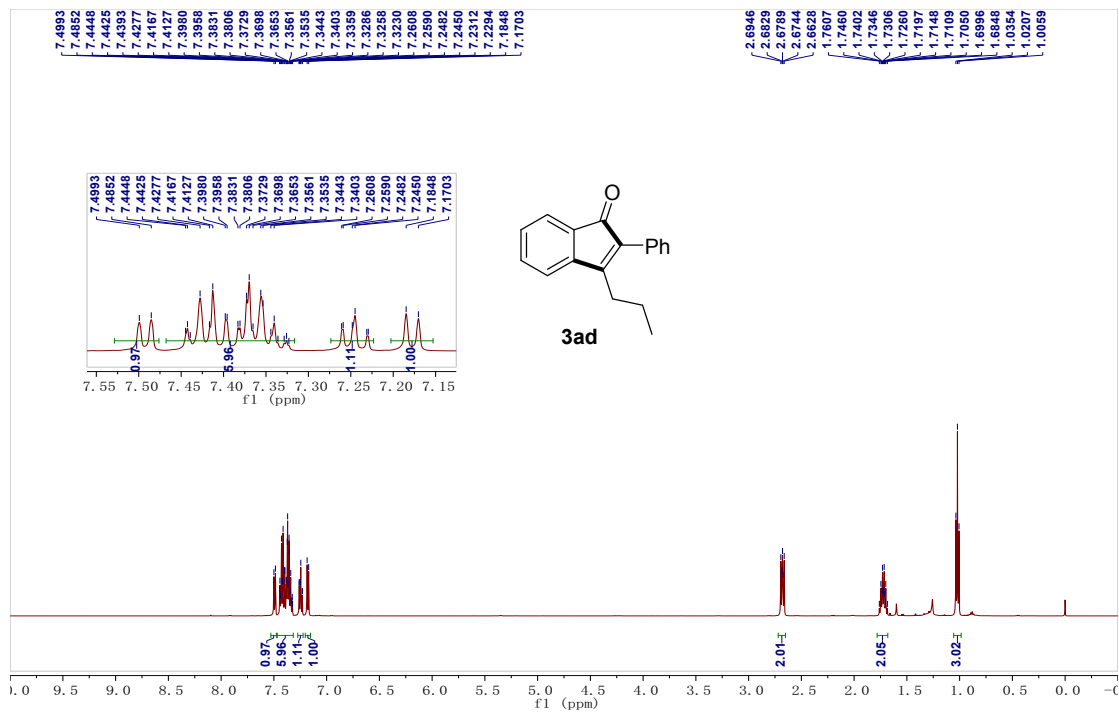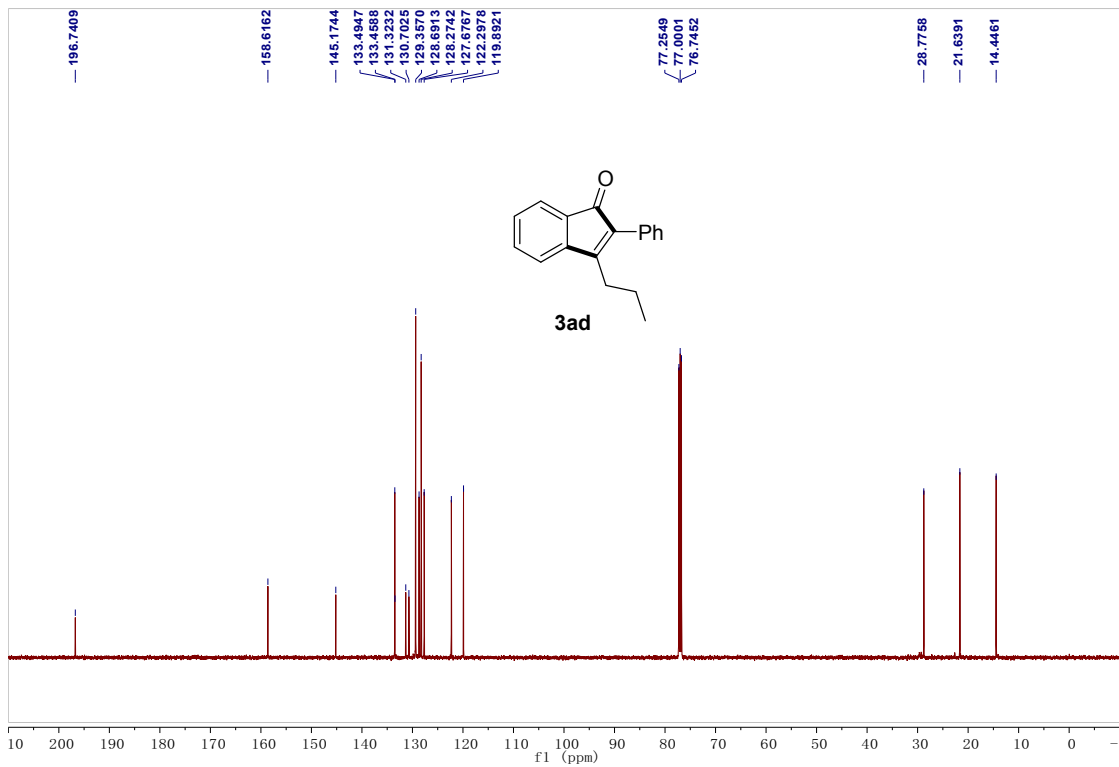

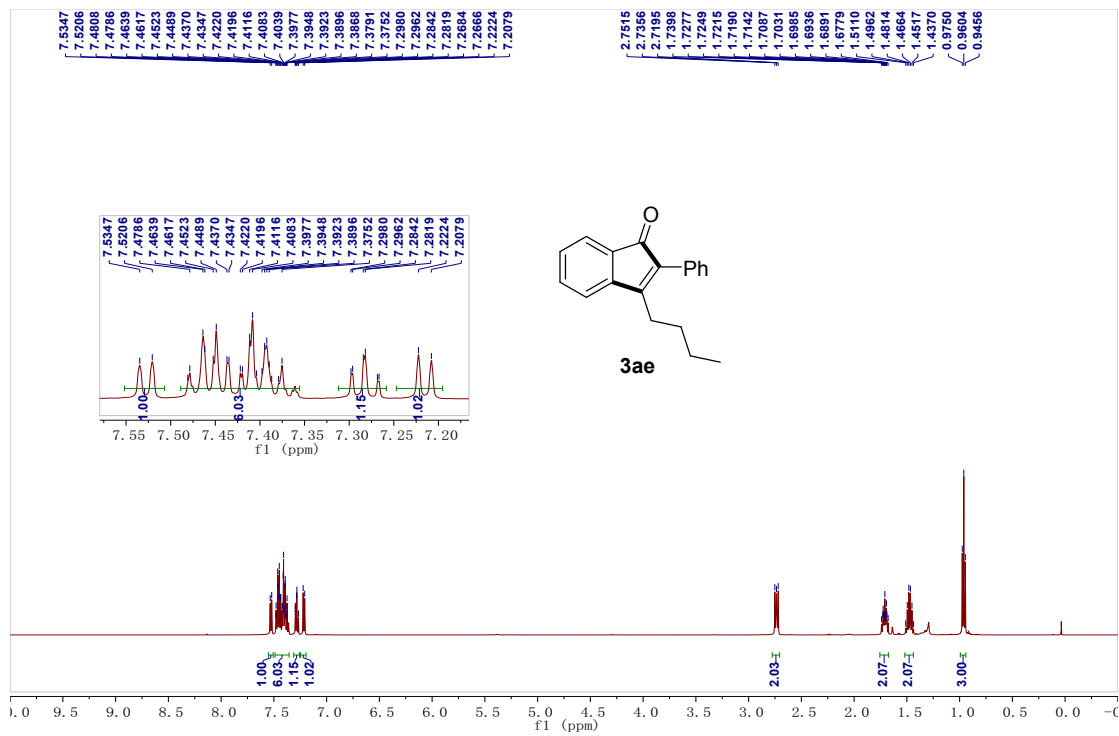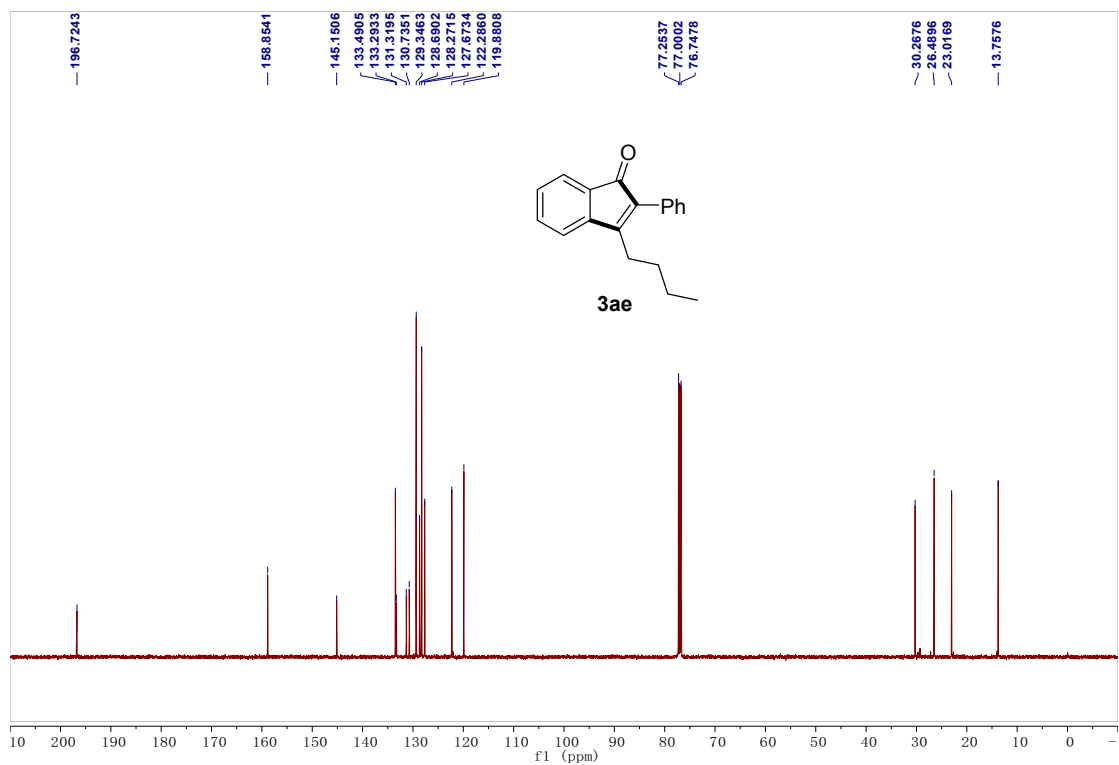

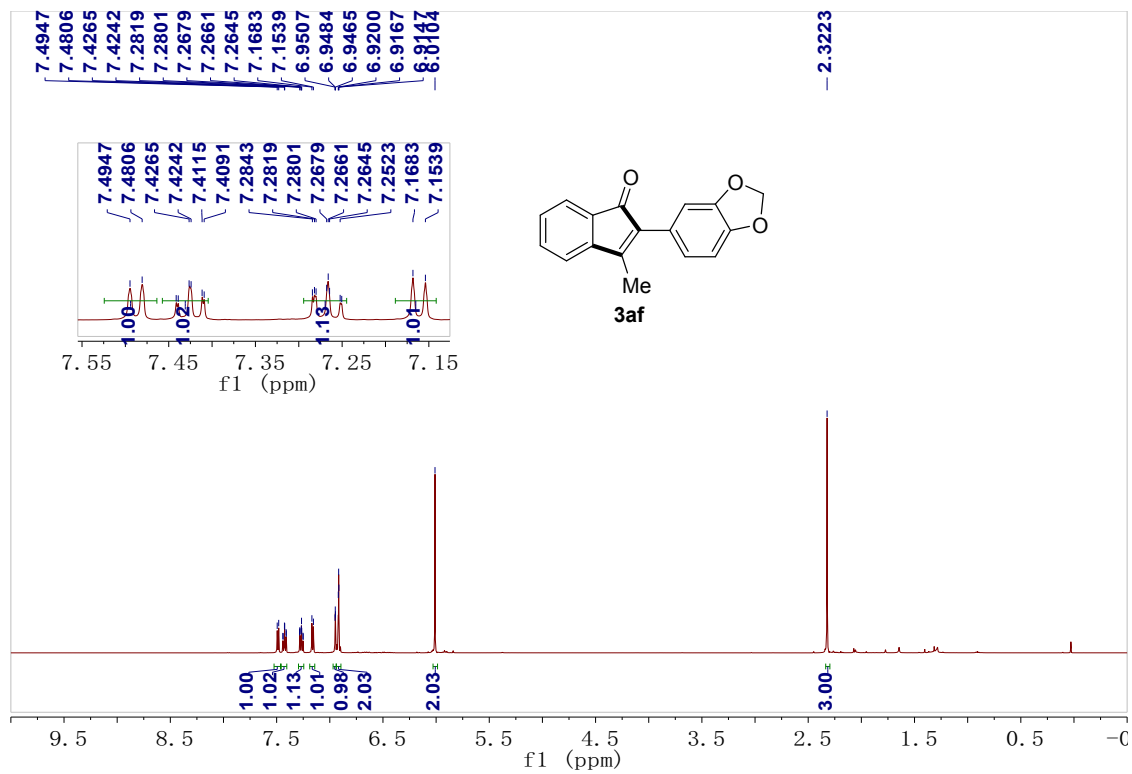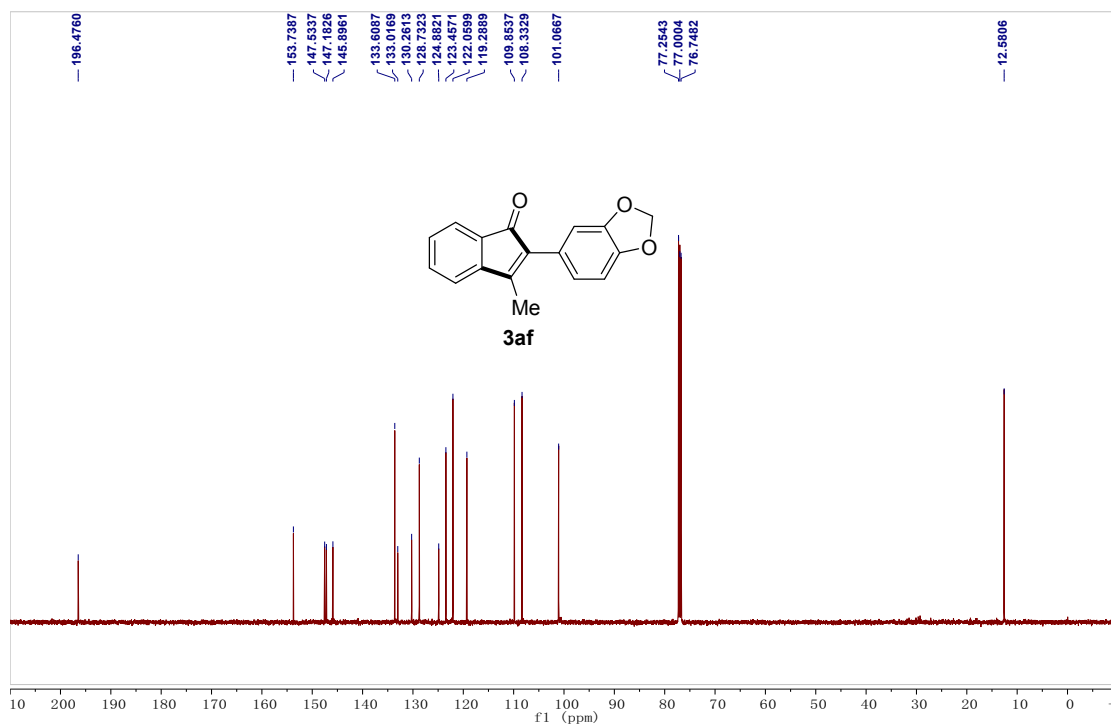

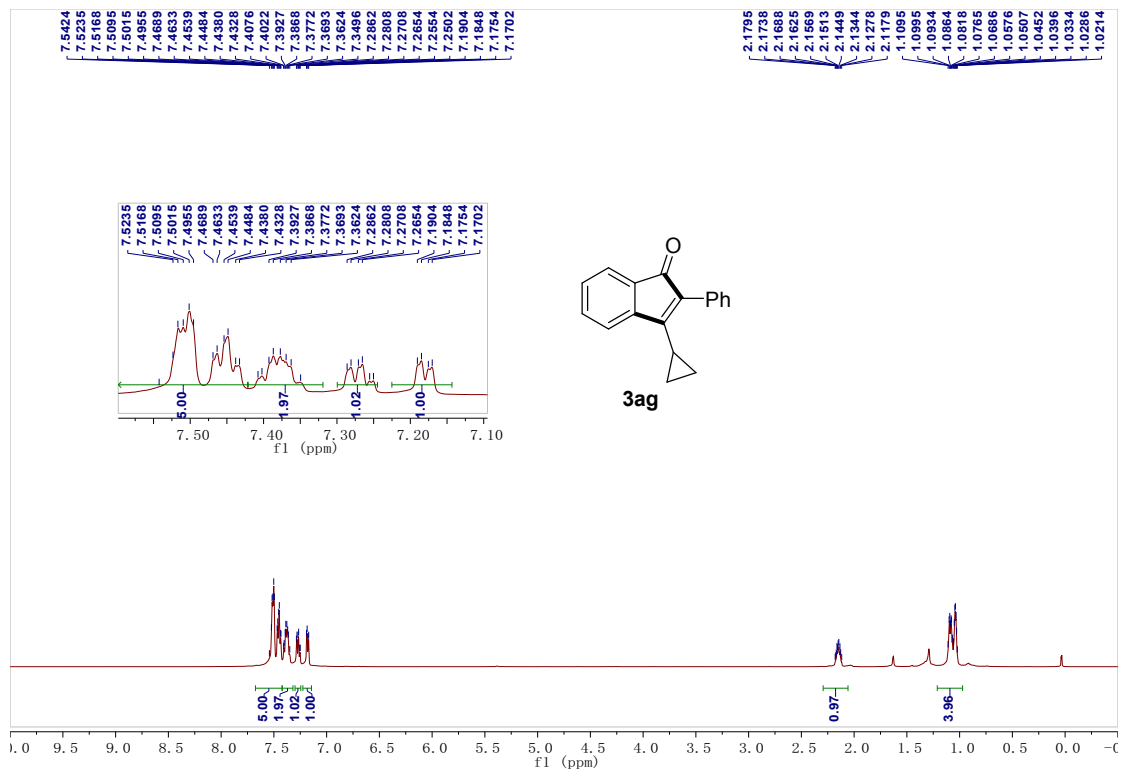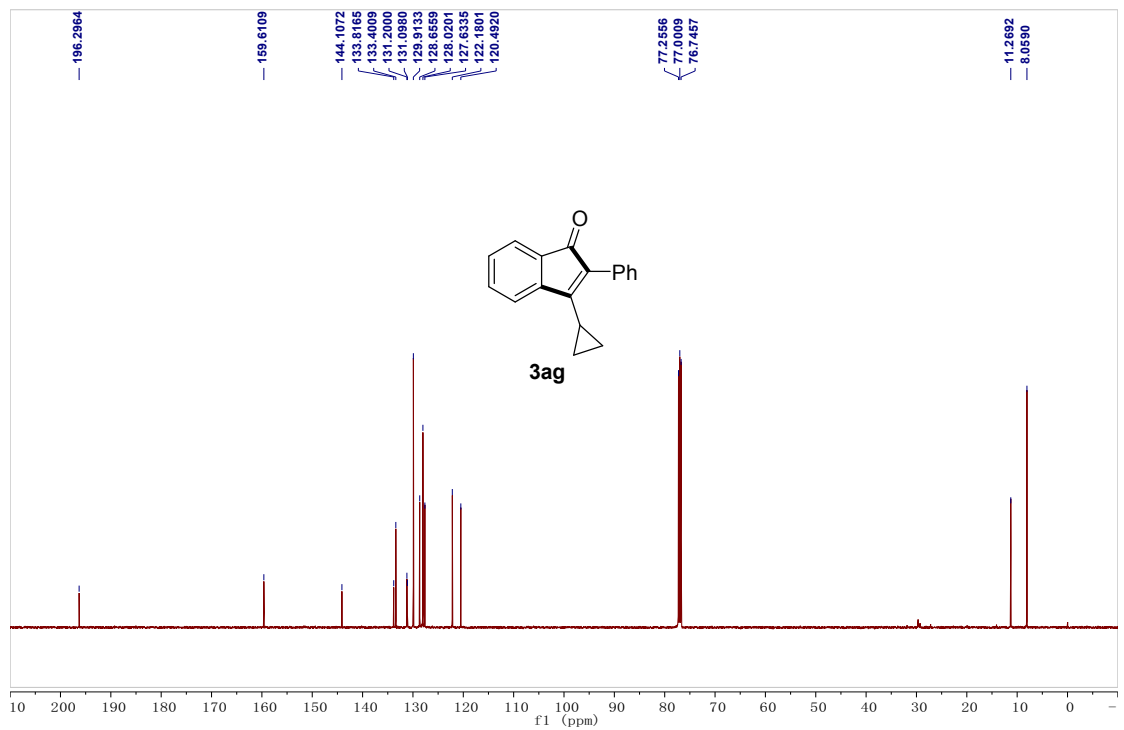

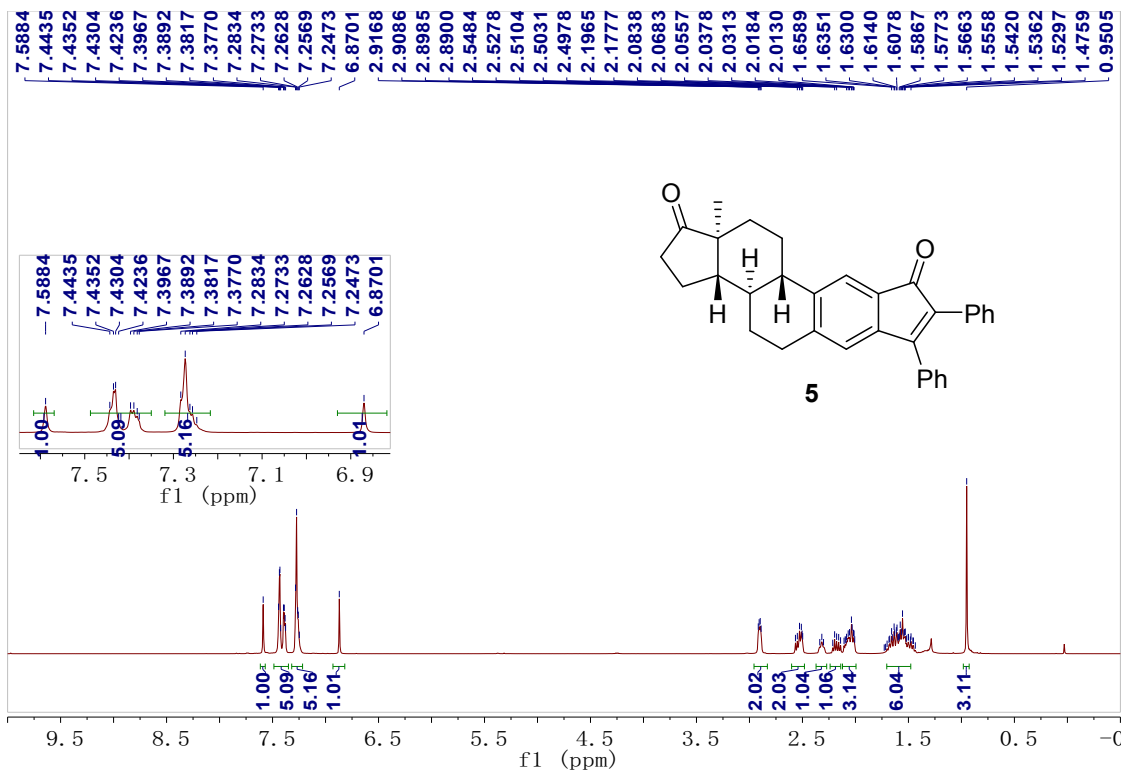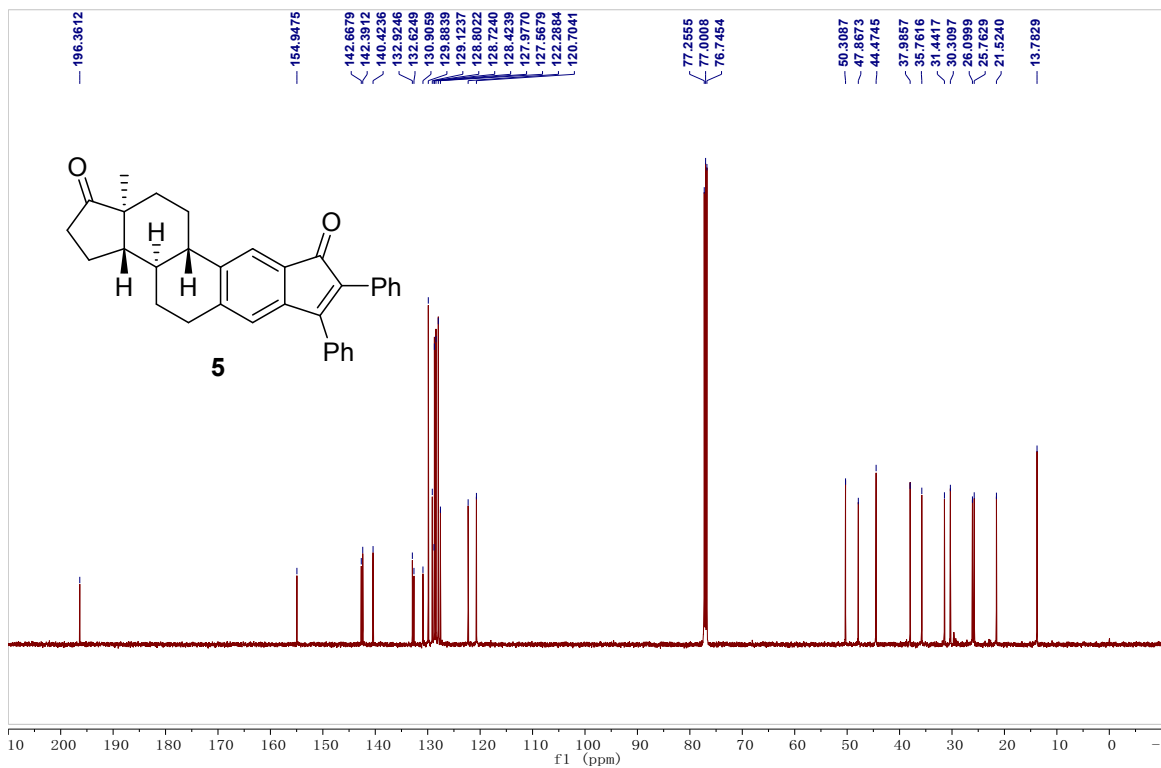

Supplement: d1qo00487e1.pdf [file d1qo00487e1.pdf]
